# Supplementary material for: Theoretical design of tetra(arenediyl)bis(allyl) derivatives as model compounds for Cope rearrangement transition states
Source: Royal Society of Chemistry journal article supplement (doi:10.1039/c4ra16381h), 2015-01-01
Supplement: c4ra16381h1.pdf [file c4ra16381h1.pdf]

*Electronic Supplementary Information for*

# Theoretical Design of Tetra(arenediyl)bis(allyl) Derivatives as Model Compounds for Cope Rearrangement Transition States

L. Salvatella

Instituto de Síntesis Química y Catálisis Homogénea–ISQCH,  
CSIC–Universidad de Zaragoza, Pedro Cerbuna 12, 50009 Zaragoza, Spain  
[lsalvate@unizar.es](mailto:lsalvate@unizar.es)

## Table of contents

|                                                                                                               |     |
|---------------------------------------------------------------------------------------------------------------|-----|
| Gaussian09 full reference .....                                                                               | S4  |
| Theoretical procedure .....                                                                                   | S4  |
| Tables.....                                                                                                   | S5  |
| Table S1. RB3LYP/6-311+G(d) electronic energies. ....                                                         | S5  |
| Table S2. RB3LYP/6-311+G(d) Gibbs free energies.....                                                          | S6  |
| Table S3. Singlet-state UB3LYP/6-311+G(d)//RB3LYP/6-311+G(d) electronic energies. ....                        | S7  |
| Table S4. Singlet-state UB3LYP/6-311+G(d)//RB3LYP/6-311+G(d) Gibbs free energies.....                         | S8  |
| Table S5. Triplet-state UB3LYP/6-311+G(d)//RB3LYP/6-311+G(d) electronic energies.....                         | S9  |
| Table S6. Pure singlet UB3LYP/6-311+G(d)//RB3LYP/6-311+G(d) electronic energies. ....                         | S10 |
| Table S7. Pure singlet UB3LYP/6-311+G(d)//RB3LYP/6-311+G(d) Gibbs free energies.....                          | S11 |
| Table S8. NICS values for delocalised structures. ....                                                        | S12 |
| Table S9. Isotropic magnetic susceptibilities.....                                                            | S13 |
| Selected properties of all structures.....                                                                    | S14 |
| 1,5-Hexadiene, boat-shaped Cope rearrangement TS.....                                                         | S14 |
| Ar = benzene-1,2-diyl, R <sup>1</sup> = R <sup>2</sup> = H, localised structure.....                          | S15 |
| Ar = benzene-1,2-diyl, R <sup>1</sup> = R <sup>2</sup> = H, delocalised structure.....                        | S16 |
| Ar = benzene-1,2-diyl, R <sup>1</sup> = R <sup>2</sup> = H, localised ⇌ delocalised TS.....                   | S17 |
| Ar = benzene-1,2-diyl, R <sup>1</sup> = F, R <sup>2</sup> = H, localised structure .....                      | S18 |
| Ar = benzene-1,2-diyl, R <sup>1</sup> = F, R <sup>2</sup> = H, delocalised structure .....                    | S19 |
| Ar = benzene-1,2-diyl, R <sup>1</sup> = F, R <sup>2</sup> = H, localised ⇌ delocalised TS .....               | S20 |
| Ar = benzene-1,2-diyl, R <sup>1</sup> = Me, R <sup>2</sup> = H, localised structure.....                      | S21 |
| Ar = benzene-1,2-diyl, R <sup>1</sup> = Me, R <sup>2</sup> = H, delocalised structure.....                    | S22 |
| Ar = benzene-1,2-diyl, R <sup>1</sup> = Me, R <sup>2</sup> = H, localised ⇌ delocalised TS.....               | S23 |
| Ar = benzene-1,2-diyl, R <sup>1</sup> = NO <sub>2</sub> , R <sup>2</sup> = H, localised structure .....       | S24 |
| Ar = benzene-1,2-diyl, R <sup>1</sup> = NO <sub>2</sub> , R <sup>2</sup> = H, delocalised structure.....      | S25 |
| Ar = benzene-1,2-diyl, R <sup>1</sup> = NO <sub>2</sub> , R <sup>2</sup> = H, localised ⇌ delocalised TS..... | S26 |
| Ar = benzene-1,2-diyl, R <sup>1</sup> = Cl, R <sup>2</sup> = H, localised structure .....                     | S27 |

|                                                                                                                |     |
|----------------------------------------------------------------------------------------------------------------|-----|
| Ar = benzene-1,2-diyl, R <sup>1</sup> = Cl, R <sup>2</sup> = H, delocalised structure .....                    | S28 |
| Ar = benzene-1,2-diyl, R <sup>1</sup> = Cl, R <sup>2</sup> = H, localised ⇌ delocalised TS .....               | S29 |
| Ar = benzene-1,2-diyl, R <sup>1</sup> = F, R <sup>2</sup> = F, localised structure.....                        | S30 |
| Ar = benzene-1,2-diyl, R <sup>1</sup> = F, R <sup>2</sup> = F, delocalised structure.....                      | S31 |
| Ar = benzene-1,2-diyl, R <sup>1</sup> = F, R <sup>2</sup> = F, localised ⇌ delocalised TS.....                 | S32 |
| Ar = benzene-1,2-diyl, R <sup>1</sup> = CN, R <sup>2</sup> = H, localised structure .....                      | S33 |
| Ar = benzene-1,2-diyl, R <sup>1</sup> = CN, R <sup>2</sup> = H, delocalised structure .....                    | S34 |
| Ar = benzene-1,2-diyl, R <sup>1</sup> = CN, R <sup>2</sup> = H, localised ⇌ delocalised TS.....                | S35 |
| Ar = benzene-1,2-diyl, R <sup>1</sup> = C≡C-H, R <sup>2</sup> = H, localised structure .....                   | S36 |
| Ar = benzene-1,2-diyl, R <sup>1</sup> = C≡C-H, R <sup>2</sup> = H, delocalised structure .....                 | S37 |
| Ar = benzene-1,2-diyl, R <sup>1</sup> = C≡C-H, R <sup>2</sup> = H, localised ⇌ delocalised TS.....             | S38 |
| Ar = benzene-1,2-diyl, R <sup>1</sup> = R <sup>2</sup> = Me, localised structure .....                         | S39 |
| Ar = benzene-1,2-diyl, R <sup>1</sup> = R <sup>2</sup> = Me, delocalised structure.....                        | S40 |
| Ar = benzene-1,2-diyl, R <sup>1</sup> = R <sup>2</sup> = Me, localised ⇌ delocalised TS.....                   | S41 |
| Ar = benzene-1,2-diyl, R <sup>1</sup> = NH <sub>2</sub> , R <sup>2</sup> = H, localised structure.....         | S42 |
| Ar = benzene-1,2-diyl, R <sup>1</sup> = NH <sub>2</sub> , R <sup>2</sup> = H, delocalised structure.....       | S43 |
| Ar = benzene-1,2-diyl, R <sup>1</sup> = R <sup>2</sup> = Cl, localised structure .....                         | S44 |
| Ar = benzene-1,2-diyl, R <sup>1</sup> = R <sup>2</sup> = Cl, delocalised structure .....                       | S45 |
| Ar = benzene-1,2-diyl, R <sup>1</sup> = R <sup>2</sup> = CN, localised structure .....                         | S46 |
| Ar = benzene-1,2-diyl, R <sup>1</sup> = R <sup>2</sup> = CN, delocalised structure .....                       | S47 |
| Ar = benzene-1,2-diyl, R <sup>1</sup> = R <sup>2</sup> = C≡C-H, localised structure.....                       | S48 |
| Ar = benzene-1,2-diyl, R <sup>1</sup> = R <sup>2</sup> = C≡C-H, delocalised structure.....                     | S49 |
| Ar = benzene-1,2-diyl, R <sup>1</sup> = -COCH=CHCO-, R <sup>2</sup> = -, localised structure .....             | S50 |
| Ar = benzene-1,2-diyl, R <sup>1</sup> = -COCH=CHCO-, R <sup>2</sup> = -, delocalised structure.....            | S51 |
| Ar = benzene-1,2-diyl, R <sup>1</sup> = -COCH=CHCO-, R <sup>2</sup> = -, localised ⇌ delocalised TS.....       | S52 |
| Ar = benzene-1,2-diyl, R <sup>1</sup> = -NHCONH-, R <sup>2</sup> = -, localised structure .....                | S53 |
| Ar = benzene-1,2-diyl, R <sup>1</sup> = -NHCONH-, R <sup>2</sup> = -, delocalised structure .....              | S54 |
| Ar = benzene-1,2-diyl, R <sup>1</sup> = naphthalene-1,8-diyl, R <sup>2</sup> = -, localised structure .....    | S55 |
| Ar = benzene-1,2-diyl, R <sup>1</sup> = naphthalene-1,8-diyl, R <sup>2</sup> = -, delocalised structure .....  | S56 |
| Ar = benzene-1,2-diyl, R <sup>1</sup> = -COOCO-, R <sup>2</sup> = -, localised structure.....                  | S57 |
| Ar = benzene-1,2-diyl, R <sup>1</sup> = -COOCO-, R <sup>2</sup> = -, delocalised structure.....                | S58 |
| Ar = R <sup>1</sup> = benzene-1,2-diyl, R <sup>2</sup> = -, localised structure .....                          | S59 |
| Ar = R <sup>1</sup> = benzene-1,2-diyl, R <sup>2</sup> = -, delocalised structure .....                        | S60 |
| Ar = benzene-1,2-diyl, R <sup>1</sup> = phenanthrene-4,5-diyl, R <sup>2</sup> = -, localised structure .....   | S61 |
| Ar = benzene-1,2-diyl, R <sup>1</sup> = phenanthrene-4,5-diyl, R <sup>2</sup> = -, delocalised structure ..... | S62 |

|                                                                                                               |     |
|---------------------------------------------------------------------------------------------------------------|-----|
| Ar = naphthalene-1,8-diyl, $R^1 = R^2 = H$ , localised structure .....                                        | S63 |
| Ar = naphthalene-1,8-diyl, $R^1 = R^2 = H$ , delocalised structure .....                                      | S64 |
| Ar = naphthalene-2,3-diyl, $R^1 = R^2 = H$ , localised structure .....                                        | S65 |
| Ar = naphthalene-2,3-diyl, $R^1 = R^2 = H$ , delocalised structure .....                                      | S66 |
| Ar = naphthalene-2,3-diyl, $R^1 = R^2 = H$ , localised $\rightleftharpoons$ delocalised TS .....              | S67 |
| Ar = thiophene-3,4-diyl, $R^1 = R^2 = H$ , localised structure .....                                          | S68 |
| Ar = thiophene-3,4-diyl, $R^1 = R^2 = H$ , delocalised structure .....                                        | S69 |
| Ar = thiophene-3,4-diyl, $R^1 = R^2 = H$ , localised $\rightleftharpoons$ delocalised TS .....                | S70 |
| Ar = pyrrole-3,4-diyl, $R^1 = R^2 = H$ , delocalised structure .....                                          | S71 |
| Ar = furan-3,4-diyl, $R^1 = R^2 = H$ , delocalised structure .....                                            | S72 |
| Diazaderivative, Ar = benzene-1,2-diyl, $R^1 = R^2 = -$ , localised structure .....                           | S73 |
| Diazaderivative, Ar = benzene-1,2-diyl, $R^1 = R^2 = -$ , delocalised structure .....                         | S74 |
| Diazaderivative, Ar = benzene-1,2-diyl, $R^1 = R^2 = -$ , localised $\rightleftharpoons$ delocalised TS ..... | S75 |
| Azaderivative, Ar = furan-3,4-diyl, $R^1 = -$ , $R^2 = H$ , delocalised structure .....                       | S76 |
| Diazaderivative, Ar = furan-3,4-diyl, $R^1 = R^2 = -$ , localised structure .....                             | S77 |
| Diazaderivative, Ar = furan-3,4-diyl, $R^1 = R^2 = -$ , delocalised structure .....                           | S78 |
| Diazaderivative, Ar = furan-3,4-diyl, $R^1 = R^2 = -$ , localised $\rightleftharpoons$ delocalised TS .....   | S79 |
| Bisethanosemibullvalene, delocalised structure .....                                                          | S80 |
| Tetra(methylene)bis(allyl), delocalised structure .....                                                       | S81 |
| Tetra(ethylene)bis(allyl), localised structure .....                                                          | S82 |
| Tetra(ethylene)bis(allyl), delocalised structure .....                                                        | S83 |
| References .....                                                                                              | S84 |

## Gaussian09 full reference

Gaussian 09, Revision A.01, M. J. Frisch, G. W. Trucks, H. B. Schlegel, G. E. Scuseria, M. A. Robb, J. R. Cheeseman, G. Scalmani, V. Barone, B. Mennucci, G. A. Petersson, H. Nakatsuji, M. Caricato, X. Li, H. P. Hratchian, A. F. Izmaylov, J. Bloino, G. Zheng, J. L. Sonnenberg, M. Hada, M. Ehara, K. Toyota, R. Fukuda, J. Hasegawa, M. Ishida, T. Nakajima, Y. Honda, O. Kitao, H. Nakai, T. Vreven, J. A. Montgomery, Jr., J. E. Peralta, F. Ogliaro, M. Bearpark, J. J. Heyd, E. Brothers, K. N. Kudin, V. N. Staroverov, R. Kobayashi, J. Normand, K. Raghavachari, A. Rendell, J. C. Burant, S. S. Iyengar, J. Tomasi, M. Cossi, N. Rega, J. M. Millam, M. Klene, J. E. Knox, J. B. Cross, V. Bakken, C. Adamo, J. Jaramillo, R. Gomperts, R. E. Stratmann, O. Yazyev, A. J. Austin, R. Cammi, C. Pomelli, J. W. Ochterski, R. L. Martin, K. Morokuma, V. G. Zakrzewski, G. A. Voth, P. Salvador, J. J. Dannenberg, S. Dapprich, A. D. Daniels, O. Farkas, J. B. Foresman, J. V. Ortiz, J. Cioslowski, D. J. Fox, Gaussian, Inc., Wallingford CT, 2009.

## Theoretical procedure

All structures were optimised at RB3LYP/6-311+G(d) level by using very tight geometry convergence criteria (OPT=VERYTIGHT) at gas phase. Stationary points were characterised by the right number of negative eigenvalues (0 for energy minima; 1 for TS) for the analytical Hessian. UB3LYP/6-311+G(d) single-point calculations (for broken-symmetry singlet and triplet electronic states, GUESS=MIX) were carried out on RB3LYP/6-311+G(d)-optimised geometries. Electronic energies for pure singlet UB3LYP wavefunctions were estimated by means of the Kraka formula:<sup>S1</sup>

$$E_{\text{pure singlet}} = \frac{1}{x} E_{\text{singlet}} - \frac{1-x}{x} E_{\text{triplet}}$$

where  $x$  is defined as follows:

$$x = \frac{\langle S^2 \rangle_{\text{triplet}} - \langle S^2 \rangle_{\text{singlet}}}{\langle S^2 \rangle_{\text{triplet}} - \langle S^2 \rangle_{\text{pure singlet}}}$$

where  $\langle S^2 \rangle_{\text{pure singlet}} = 0$ .

Broken-symmetry singlet-state UB3LYP wavefunctions were used for calculations of Nucleus-Independent Chemical Shifts (NICS) and isotropic magnetic susceptibilities. NICS were calculated as the negative of the magnetic shielding computed at different points<sup>S2</sup> by using the Gauge-Independent Atomic Orbital (GIAO) method. Thus, NICS(0) values were computed at the centre of the localised or delocalised ring (by using Cartesian coordinates of all 6 heavy atoms). A "ring plane" was obtained for every structure by least-square fit in order to minimise the distances from that plane to all 6 heavy atoms. A straight passing through the ring centre was calculated as perpendicular to the "ring plane". Every NICS(1) value was calculated at a point placed in the concave ring side at 1 Å far from the ring centre by following the aforementioned straight. NICS(-1) values were analogously obtained for the convex ring side. Isotropic magnetic susceptibility was also calculated for each structure by using the GIAO method.

Gibbs free energies at three different levels (RB3LYP/6-311+G(d), singlet-state UB3LYP/6-311+G(d), and pure singlet UB3LYP/6-311+G(d)) for each stationary point were calculated from the electronic energy at the corresponding level as well as thermal corrections (at 25 °C) from non-scaled RB3LYP/6-311+G(d) analytical frequencies.

## Tables

**Table S1. RB3LYP/6-311+G(d) electronic energies.**

| Ar                   | R <sup>1</sup>        | R <sup>2</sup> | localised structure |                 | delocalised structure |                 | localised<br>delocalised TS |                  | ⇌ |
|----------------------|-----------------------|----------------|---------------------|-----------------|-----------------------|-----------------|-----------------------------|------------------|---|
|                      |                       |                | E <sup>a</sup>      | ΔE <sup>b</sup> | E <sup>a</sup>        | ΔE <sup>b</sup> | E <sup>a</sup>              | ΔE <sup>‡b</sup> |   |
| benzene-1,2-diyl     | H                     | H              | -1154.100892        | 0.0             | -1154.100103          | 0.5             | -1154.099587                | 0.8              |   |
| benzene-1,2-diyl     | F                     | H              | -1253.373035        | 0.0             | -1253.370720          | 1.5             | -1253.370480                | 1.6              |   |
| benzene-1,2-diyl     | Me                    | H              | -1193.421983        | 0.0             | -1193.419008          | 1.9             | -1193.419017                | 1.9              |   |
| benzene-1,2-diyl     | NO <sub>2</sub>       | H              | -1358.657686        | 0.0             | -1358.655707          | 1.2             | -1358.655406                | 1.4              |   |
| benzene-1,2-diyl     | Cl                    | H              | -1613.722788        | 0.0             | -1613.719739          | 1.9             | -1613.719687                | 1.9              |   |
| benzene-1,2-diyl     | F                     | F              | -1352.643144        | 0.0             | -1352.638730          | 2.8             | -1352.638834                | 2.7              |   |
| benzene-1,2-diyl     | CN                    | H              | -1246.365931        | 0.0             | -1246.362638          | 2.1             | -1246.362613                | 2.1              |   |
| benzene-1,2-diyl     | C≡CH                  | H              | -1230.261370        | 0.0             | -1230.257344          | 2.5             | -1230.257367                | 2.5              |   |
| benzene-1,2-diyl     | Me                    | Me             | -1232.742516        | 0.0             | -1232.736564          | 3.7             | -1232.736620                | 3.7              |   |
| benzene-1,2-diyl     | NH <sub>2</sub>       | H              | -1209.476524        | 0.0             | -1209.470861          | 3.6             | — <sup>c</sup>              | — <sup>c</sup>   |   |
| benzene-1,2-diyl     | Cl                    | Cl             | -2073.343216        | 0.0             | -2073.337536          | 3.6             | — <sup>c</sup>              | — <sup>c</sup>   |   |
| benzene-1,2-diyl     | CN                    | CN             | -1338.628064        | 0.0             | -1338.621755          | 4.0             | — <sup>c</sup>              | — <sup>c</sup>   |   |
| benzene-1,2-diyl     | C≡CH                  | C≡CH           | -1306.421201        | 0.0             | -1306.413482          | 4.8             | — <sup>c</sup>              | — <sup>c</sup>   |   |
| benzene-1,2-diyl     | —COCH=CHCO—           | —              | -1457.013067        | 0.0             | -1457.009247          | 2.4             | -1457.009230                | 2.4              |   |
| benzene-1,2-diyl     | —NHCONH—              | —              | -1376.997905        | 0.0             | -1376.993923          | 2.5             | — <sup>c</sup>              | — <sup>c</sup>   |   |
| benzene-1,2-diyl     | naphthalene-1,8-diyl  | —              | -1537.655178        | 0.0             | -1537.650608          | 2.9             | — <sup>c</sup>              | — <sup>c</sup>   |   |
| benzene-1,2-diyl     | —COOCO—               | —              | -1454.858697        | 0.0             | -1454.854174          | 2.8             | — <sup>c</sup>              | — <sup>c</sup>   |   |
| benzene-1,2-diyl     | benzene-1,2-diyl      | —              | -1383.955487        | 0.0             | -1383.950399          | 3.2             | — <sup>c</sup>              | — <sup>c</sup>   |   |
| benzene-1,2-diyl     | phenanthrene-4,5-diyl | —              | -1691.315812        | 0.0             | -1691.310281          | 3.5             | — <sup>c</sup>              | — <sup>c</sup>   |   |
| naphthalene-1,8-diyl | H                     | H              | -1768.901955        | 0.0             | -1768.890778          | 7.0             | — <sup>c</sup>              | — <sup>c</sup>   |   |
| naphthalene-2,3-diyl | H                     | H              | -1768.803499        | 0.0             | -1768.804786          | -0.8            | -1768.803050                | 0.3              |   |
| thiophene-3,4-diyl   | H                     | H              | -2437.134620        | 0.0             | -2437.139563          | -3.1            | -2437.134616                | 0.0              |   |
| pyrrole-3,4-diyl     | H                     | H              | — <sup>c</sup>      | — <sup>c</sup>  | -1065.726548          | —               | — <sup>c</sup>              | — <sup>c</sup>   |   |
| furan-3,4-diyl       | H                     | H              | — <sup>c</sup>      | — <sup>c</sup>  | -1145.172640          | —               | — <sup>c</sup>              | — <sup>c</sup>   |   |
| benzene-1,2-diyl     | aza                   | H              | -1170.140725        | 0.0             | -1170.138798          | 1.2             | -1170.138795                | 1.2              |   |
| benzene-1,2-diyl     | aza                   | aza            | -1186.177220        | 0.0             | -1186.174768          | 1.5             | -1186.174739                | 1.6              |   |
| furan-3,4-diyl       | aza                   | H              | — <sup>c</sup>      | — <sup>c</sup>  | -1161.207279          | —               | — <sup>c</sup>              | — <sup>c</sup>   |   |
| furan-3,4-diyl       | aza                   | aza            | -1177.235771        | 0.0             | -1177.239646          | -2.4            | -1177.235432                | 0.2              |   |

<sup>a</sup> Electronic energies (Hartrees). <sup>b</sup> Relative electronic energies (kcal mol<sup>-1</sup>). <sup>c</sup> Structure could not be obtained.

**Table S2. RB3LYP/6-311+G(d) Gibbs free energies.**

| Ar                   | R <sup>1</sup>        | R <sup>2</sup> | localised structure |                | delocalised structure |              | localised $\rightleftharpoons$ delocalised TS |                 |
|----------------------|-----------------------|----------------|---------------------|----------------|-----------------------|--------------|-----------------------------------------------|-----------------|
|                      |                       |                | G <sup>a</sup>      | $\Delta G^b$   | G <sup>a</sup>        | $\Delta G^b$ | G <sup>a</sup>                                | $\Delta G^{ib}$ |
| benzene-1,2-diyl     | H                     | H              | -1153.772854        | 0.0            | -1153.772324          | 0.3          | -1153.772399                                  | 0.3             |
| benzene-1,2-diyl     | F                     | H              | -1253.053910        | 0.0            | -1253.053148          | 0.5          | -1253.052563                                  | 0.8             |
| benzene-1,2-diyl     | Me                    | H              | -1193.067420        | 0.0            | -1193.066402          | 0.6          | -1193.065765                                  | 1.0             |
| benzene-1,2-diyl     | NO <sub>2</sub>       | H              | -1358.331719        | 0.0            | -1358.330828          | 0.6          | -1358.330239                                  | 0.9             |
| benzene-1,2-diyl     | Cl                    | H              | -1613.405981        | 0.0            | -1613.404768          | 0.8          | -1613.404060                                  | 1.2             |
| benzene-1,2-diyl     | F                     | F              | -1352.333029        | 0.0            | -1352.330327          | 1.7          | -1352.330261                                  | 1.7             |
| benzene-1,2-diyl     | CN                    | H              | -1246.041731        | 0.0            | -1246.040211          | 1.0          | -1246.039458                                  | 1.4             |
| benzene-1,2-diyl     | C $\equiv$ CH         | H              | -1229.927205        | 0.0            | -1229.925477          | 1.1          | -1229.924277                                  | 1.8             |
| benzene-1,2-diyl     | Me                    | Me             | -1232.361845        | 0.0            | -1232.358179          | 2.3          | -1232.358040                                  | 2.4             |
| benzene-1,2-diyl     | NH <sub>2</sub>       | H              | -1209.131918        | 0.0            | -1209.127315          | 2.9          | — <sup>c</sup>                                | — <sup>c</sup>  |
| benzene-1,2-diyl     | Cl                    | Cl             | -2073.037812        | 0.0            | -2073.032933          | 3.1          | — <sup>c</sup>                                | — <sup>c</sup>  |
| benzene-1,2-diyl     | CN                    | CN             | -1338.307696        | 0.0            | -1338.302170          | 3.5          | — <sup>c</sup>                                | — <sup>c</sup>  |
| benzene-1,2-diyl     | C $\equiv$ CH         | C $\equiv$ CH  | -1306.080894        | 0.0            | -1306.074109          | 4.3          | — <sup>c</sup>                                | — <sup>c</sup>  |
| benzene-1,2-diyl     | —COCH=CHCO—           | —              | -1456.659010        | 0.0            | -1456.656807          | 1.4          | -1456.656258                                  | 1.7             |
| benzene-1,2-diyl     | —NHCONH—              | —              | -1376.650074        | 0.0            | -1376.647414          | 1.7          | — <sup>c</sup>                                | — <sup>c</sup>  |
| benzene-1,2-diyl     | naphthalene-1,8-diyl  | —              | -1537.227713        | 0.0            | -1537.224130          | 2.2          | — <sup>c</sup>                                | — <sup>c</sup>  |
| benzene-1,2-diyl     | —COOCO—               | —              | -1454.531940        | 0.0            | -1454.528214          | 2.3          | — <sup>c</sup>                                | — <sup>c</sup>  |
| benzene-1,2-diyl     | benzene-1,2-diyl      | —              | -1383.572198        | 0.0            | -1383.567467          | 3.0          | — <sup>c</sup>                                | — <sup>c</sup>  |
| benzene-1,2-diyl     | phenanthrene-4,5-diyl | —              | -1690.845597        | 0.0            | -1690.840263          | 3.3          | — <sup>c</sup>                                | — <sup>c</sup>  |
| naphthalene-1,8-diyl | H                     | H              | -1768.396714        | 0.0            | -1768.386045          | 6.7          | — <sup>c</sup>                                | — <sup>c</sup>  |
| naphthalene-2,3-diyl | H                     | H              | -1768.303637        | 0.0            | -1768.304341          | -0.4         | -1768.303543                                  | 0.1             |
| thiophene-3,4-diyl   | H                     | H              | -2436.940774        | 0.0            | -2436.944656          | -2.4         | -2436.940197                                  | 0.4             |
| pyrrole-3,4-diyl     | H                     | H              | — <sup>c</sup>      | — <sup>c</sup> | -1065.467186          | —            | — <sup>c</sup>                                | — <sup>c</sup>  |
| furan-3,4-diyl       | H                     | H              | — <sup>c</sup>      | — <sup>c</sup> | -1145.016116          | —            | — <sup>c</sup>                                | — <sup>c</sup>  |
| benzene-1,2-diyl     | aza                   | H              | -1169.824730        | 0.0            | -1169.824248          | 0.3          | -1169.823826                                  | 0.6             |
| benzene-1,2-diyl     | aza                   | aza            | -1185.873497        | 0.0            | -1185.872330          | 0.7          | -1185.872147                                  | 0.8             |
| furan-3,4-diyl       | aza                   | H              | — <sup>c</sup>      | — <sup>c</sup> | -1161.008440          | —            | — <sup>c</sup>                                | — <sup>c</sup>  |
| furan-3,4-diyl       | aza                   | aza            | -1177.048379        | 0.0            | -1177.052693          | -2.7         | -1177.048552                                  | -0.1            |

<sup>a</sup> Sum of electronic and thermal free energies (Hartrees). <sup>b</sup> Relative Gibbs free energies (kcal mol<sup>-1</sup>).

<sup>c</sup> Structure could not be obtained.

**Table S3. Singlet-state UB3LYP/6-311+G(d)//RB3LYP/6-311+G(d) electronic energies.**

| Ar                   | R <sup>1</sup>        | R <sup>2</sup> | localised structure |                |                       | delocalised structure |              |                       | localised $\rightleftharpoons$ delocalised TS |                |                       |
|----------------------|-----------------------|----------------|---------------------|----------------|-----------------------|-----------------------|--------------|-----------------------|-----------------------------------------------|----------------|-----------------------|
|                      |                       |                | E <sup>a</sup>      | $\Delta E^b$   | $\langle S^2 \rangle$ | E <sup>a</sup>        | $\Delta E^b$ | $\langle S^2 \rangle$ | E <sup>a</sup>                                | $\Delta E^b$   | $\langle S^2 \rangle$ |
| benzene-1,2-diyl     | H                     | H              | -1154.100892        | 0.0            | 0.0000                | -1154.103588          | -1.7         | 0.5391                | -1154.099587                                  | 0.8            | 0.0000                |
| benzene-1,2-diyl     | F                     | H              | -1253.373035        | 0.0            | 0.0000                | -1253.373531          | -0.3         | 0.5067                | -1253.370914                                  | 1.3            | 0.2627                |
| benzene-1,2-diyl     | Me                    | H              | -1193.421983        | 0.0            | 0.0000                | -1193.421400          | 0.4          | 0.4676                | -1193.419442                                  | 1.6            | 0.2190                |
| benzene-1,2-diyl     | NO <sub>2</sub>       | H              | -1358.657686        | 0.0            | 0.0000                | -1358.657432          | 0.2          | 0.4310                | -1358.655410                                  | 1.4            | 0.0233                |
| benzene-1,2-diyl     | Cl                    | H              | -1613.722788        | 0.0            | 0.0000                | -1613.721798          | 0.6          | 0.4450                | -1613.720102                                  | 1.7            | 0.2164                |
| benzene-1,2-diyl     | F                     | F              | -1352.643144        | 0.0            | 0.0000                | -1352.642270          | 0.5          | 0.5382                | -1352.640327                                  | 1.8            | 0.3893                |
| benzene-1,2-diyl     | CN                    | H              | -1246.365931        | 0.0            | 0.0000                | -1246.364425          | 0.9          | 0.4159                | -1246.363087                                  | 1.8            | 0.2314                |
| benzene-1,2-diyl     | C $\equiv$ CH         | H              | -1230.261370        | 0.0            | 0.0000                | -1230.259339          | 1.3          | 0.4396                | -1230.258615                                  | 1.7            | 0.3613                |
| benzene-1,2-diyl     | Me                    | Me             | -1232.742516        | 0.0            | 0.0000                | -1232.739136          | 2.1          | 0.4884                | -1232.739008                                  | 2.2            | 0.4783                |
| benzene-1,2-diyl     | NH <sub>2</sub>       | H              | -1209.476524        | 0.0            | 0.0000                | -1209.473545          | 1.9          | 0.5032                | — <sup>c</sup>                                | — <sup>c</sup> | — <sup>c</sup>        |
| benzene-1,2-diyl     | Cl                    | Cl             | -2073.343216        | 0.0            | 0.0000                | -2073.339454          | 2.4          | 0.4176                | — <sup>c</sup>                                | — <sup>c</sup> | — <sup>c</sup>        |
| benzene-1,2-diyl     | CN                    | CN             | -1338.628064        | 0.0            | 0.0000                | -1338.622864          | 3.3          | 0.3233                | — <sup>c</sup>                                | — <sup>c</sup> | — <sup>c</sup>        |
| benzene-1,2-diyl     | C $\equiv$ CH         | C $\equiv$ CH  | -1306.421201        | 0.0            | 0.0000                | -1306.414974          | 3.9          | 0.4396                | — <sup>c</sup>                                | — <sup>c</sup> | — <sup>c</sup>        |
| benzene-1,2-diyl     | —COCH=CHCO—           | —              | -1457.013067        | 0.0            | 0.0000                | -1457.010276          | 1.8          | 0.3005                | -1457.010276                                  | 1.8            | 0.3005                |
| benzene-1,2-diyl     | —NHCONH—              | —              | -1376.997905        | 0.0            | 0.0000                | -1376.994387          | 2.2          | 0.1850                | — <sup>c</sup>                                | — <sup>c</sup> | — <sup>c</sup>        |
| benzene-1,2-diyl     | naphthalene-1,8-diyl  | —              | -1537.655178        | 0.0            | 0.0000                | -1537.650900          | 2.7          | 0.1810                | — <sup>c</sup>                                | — <sup>c</sup> | — <sup>c</sup>        |
| benzene-1,2-diyl     | —COOCO—               | —              | -1454.858697        | 0.0            | 0.0000                | -1454.854325          | 2.7          | 0.0866                | — <sup>c</sup>                                | — <sup>c</sup> | — <sup>c</sup>        |
| benzene-1,2-diyl     | benzene-1,2-diyl      | —              | -1383.955487        | 0.0            | 0.0000                | -1383.950600          | 3.1          | 0.0000                | — <sup>c</sup>                                | — <sup>c</sup> | — <sup>c</sup>        |
| benzene-1,2-diyl     | phenanthrene-4,5-diyl | —              | -1691.315812        | 0.0            | 0.0000                | -1691.310790          | 3.2          | 0.2052                | — <sup>c</sup>                                | — <sup>c</sup> | — <sup>c</sup>        |
| naphthalene-1,8-diyl | H                     | H              | -1768.901955        | 0.0            | 0.0000                | -1768.891065          | 6.8          | 0.0000                | — <sup>c</sup>                                | — <sup>c</sup> | — <sup>c</sup>        |
| naphthalene-2,3-diyl | H                     | H              | -1768.803499        | 0.0            | 0.0000                | -1768.809338          | -3.7         | 0.6128                | -1768.803050                                  | 0.3            | 0.0000                |
| thiophene-3,4-diyl   | H                     | H              | -2437.134620        | 0.0            | 0.0000                | -2437.157937          | -14.6        | 0.9879                | -2437.158508                                  | -15.0          | 0.9878                |
| pyrrole-3,4-diyl     | H                     | H              | — <sup>c</sup>      | — <sup>c</sup> | — <sup>c</sup>        | -1065.756895          | —            | 1.0634                | — <sup>c</sup>                                | — <sup>c</sup> | — <sup>c</sup>        |
| furan-3,4-diyl       | H                     | H              | — <sup>c</sup>      | — <sup>c</sup> | — <sup>c</sup>        | -1145.208567          | —            | 1.0699                | — <sup>c</sup>                                | — <sup>c</sup> | — <sup>c</sup>        |
| benzene-1,2-diyl     | aza                   | H              | -1170.140725        | 0.0            | 0.0000                | -1170.139737          | 0.6          | 0.2790                | -1170.138795                                  | 1.2            | 0.0000                |
| benzene-1,2-diyl     | aza                   | aza            | -1186.177220        | 0.0            | 0.0000                | -1186.174965          | 1.4          | 0.0777                | -1186.174965                                  | 1.4            | 0.0777                |
| furan-3,4-diyl       | aza                   | H              | — <sup>c</sup>      | — <sup>c</sup> | — <sup>c</sup>        | -1161.236655          | —            | 1.0570                | — <sup>c</sup>                                | — <sup>c</sup> | — <sup>c</sup>        |
| furan-3,4-diyl       | aza                   | aza            | -1177.235771        | 0.0            | 0.0000                | -1177.262602          | -16.8        | 1.0101                | -1177.235432                                  | 0.2            | 0.0000                |

<sup>a</sup> Electronic energies (Hartrees). <sup>b</sup> Relative electronic energies (kcal mol<sup>-1</sup>). <sup>c</sup> Structure could not be obtained.

**Table S4. Singlet-state UB3LYP/6-311+G(d)//RB3LYP/6-311+G(d) Gibbs free energies.**

| Ar                   | R <sup>1</sup>        | R <sup>2</sup> | localised structure |                | delocalised structure |              | localised $\rightleftharpoons$ delocalised TS |                 |
|----------------------|-----------------------|----------------|---------------------|----------------|-----------------------|--------------|-----------------------------------------------|-----------------|
|                      |                       |                | G <sup>a</sup>      | $\Delta G^b$   | E <sup>a</sup>        | $\Delta G^b$ | G <sup>a</sup>                                | $\Delta G^{*b}$ |
| benzene-1,2-diyl     | H                     | H              | -1153.772854        | 0.0            | -1153.775808          | -1.9         | -1153.772399                                  | 0.3             |
| benzene-1,2-diyl     | F                     | H              | -1253.053910        | 0.0            | -1253.055959          | -1.3         | -1253.052563                                  | 0.8             |
| benzene-1,2-diyl     | Me                    | H              | -1193.067420        | 0.0            | -1193.068794          | -0.9         | -1193.065765                                  | 1.0             |
| benzene-1,2-diyl     | NO <sub>2</sub>       | H              | -1358.331719        | 0.0            | -1358.332553          | -0.5         | -1358.330239                                  | 0.9             |
| benzene-1,2-diyl     | Cl                    | H              | -1613.405981        | 0.0            | -1613.406827          | -0.5         | -1613.404060                                  | 1.2             |
| benzene-1,2-diyl     | F                     | F              | -1352.333029        | 0.0            | -1352.333867          | -0.5         | -1352.330261                                  | 1.7             |
| benzene-1,2-diyl     | CN                    | H              | -1246.041731        | 0.0            | -1246.041998          | -0.2         | -1246.039458                                  | 1.4             |
| benzene-1,2-diyl     | C $\equiv$ CH         | H              | -1229.927205        | 0.0            | -1229.927472          | -0.2         | -1229.924277                                  | 1.8             |
| benzene-1,2-diyl     | Me                    | Me             | -1232.361845        | 0.0            | -1232.360751          | 0.7          | -1232.358040                                  | 2.4             |
| benzene-1,2-diyl     | NH <sub>2</sub>       | H              | -1209.131918        | 0.0            | -1209.129999          | 1.2          | – <sup>c</sup>                                | – <sup>c</sup>  |
| benzene-1,2-diyl     | Cl                    | Cl             | -2073.037812        | 0.0            | -2073.034851          | 1.9          | – <sup>c</sup>                                | – <sup>c</sup>  |
| benzene-1,2-diyl     | CN                    | CN             | -1338.307696        | 0.0            | -1338.303279          | 2.8          | – <sup>c</sup>                                | – <sup>c</sup>  |
| benzene-1,2-diyl     | C $\equiv$ CH         | C $\equiv$ CH  | -1306.080894        | 0.0            | -1306.075601          | 3.3          | – <sup>c</sup>                                | – <sup>c</sup>  |
| benzene-1,2-diyl     | –<br>COCH=CHCO–       | –              | -1456.659010        | 0.0            | -1456.657837          | 0.7          | -1456.656258                                  | 1.7             |
| benzene-1,2-diyl     | –NHCONH–              | –              | -1376.650074        | 0.0            | -1376.647879          | 1.4          | – <sup>c</sup>                                | – <sup>c</sup>  |
| benzene-1,2-diyl     | naphthalene-1,8-diyl  | –              | -1537.227713        | 0.0            | -1537.224422          | 2.1          | – <sup>c</sup>                                | – <sup>c</sup>  |
| benzene-1,2-diyl     | –COOCO–               | –              | -1454.531940        | 0.0            | -1454.528365          | 2.2          | – <sup>c</sup>                                | – <sup>c</sup>  |
| benzene-1,2-diyl     | benzene-1,2-diyl      | –              | -1383.572198        | 0.0            | -1383.567668          | 2.8          | – <sup>c</sup>                                | – <sup>c</sup>  |
| benzene-1,2-diyl     | phenanthrene-4,5-diyl | –              | -1690.845597        | 0.0            | -1690.840771          | 3.0          | – <sup>c</sup>                                | – <sup>c</sup>  |
| naphthalene-1,8-diyl | H                     | H              | -1768.396714        | 0.0            | -1768.386332          | 6.5          | – <sup>c</sup>                                | – <sup>c</sup>  |
| naphthalene-2,3-diyl | H                     | H              | -1768.303637        | 0.0            | -1768.308892          | -3.3         | -1768.303543                                  | 0.1             |
| thiophene-3,4-diyl   | H                     | H              | -2436.940774        | 0.0            | -2436.963030          | -14.0        | -2436.940197                                  | 0.4             |
| pyrrole-3,4-diyl     | H                     | H              | – <sup>c</sup>      | – <sup>c</sup> | -1065.497533          | –            | – <sup>c</sup>                                | – <sup>c</sup>  |
| furan-3,4-diyl       | H                     | H              | – <sup>c</sup>      | – <sup>c</sup> | -1145.052043          | –            | – <sup>c</sup>                                | – <sup>c</sup>  |
| benzene-1,2-diyl     | aza                   | H              | -1169.824730        | 0.0            | -1169.825187          | -0.3         | -1169.823826                                  | 0.6             |
| benzene-1,2-diyl     | aza                   | aza            | -1185.873497        | 0.0            | -1185.872527          | 0.6          | -1185.872147                                  | 0.8             |
| furan-3,4-diyl       | aza                   | H              | – <sup>c</sup>      | – <sup>c</sup> | -1161.037816          | –            | – <sup>c</sup>                                | – <sup>c</sup>  |
| furan-3,4-diyl       | aza                   | aza            | -1177.048379        | 0.0            | -1177.075649          | -17.1        | -1177.048552                                  | -0.1            |

<sup>a</sup> Sum of electronic and thermal free energies (Hartrees). <sup>b</sup> Relative Gibbs free energies (kcal mol<sup>-1</sup>).

<sup>c</sup> Structure could not be obtained.



**Table S5. Triplet-state UB3LYP/6-311+G(d)//RB3LYP/6-311+G(d) electronic energies.**

| Ar                   | R <sup>1</sup>        | R <sup>2</sup> | delocalised structure |                       | localised $\rightleftharpoons$ delocalised TS |                       |
|----------------------|-----------------------|----------------|-----------------------|-----------------------|-----------------------------------------------|-----------------------|
|                      |                       |                | E <sup>a</sup>        | $\langle S^2 \rangle$ | E <sup>a</sup>                                | $\langle S^2 \rangle$ |
| benzene-1,2-diyl     | H                     | H              | -1154.085367          | 2.0626                | -1154.056616                                  | 2.0519                |
| benzene-1,2-diyl     | F                     | H              | -1253.354546          | 2.0630                | -1253.343737                                  | 2.0519                |
| benzene-1,2-diyl     | Me                    | H              | -1193.400843          | 2.0649                | -1193.390507                                  | 2.0611                |
| benzene-1,2-diyl     | NO <sub>2</sub>       | H              | -1358.636064          | 2.0640                | -1358.620011                                  | 2.0580                |
| benzene-1,2-diyl     | Cl                    | H              | -1613.700472          | 2.0656                | -1613.690991                                  | 2.0621                |
| benzene-1,2-diyl     | F                     | F              | -1352.623950          | 2.0637                | -1352.617231                                  | 2.0613                |
| benzene-1,2-diyl     | CN                    | H              | -1246.341934          | 2.0700                | -1246.334382                                  | 2.0667                |
| benzene-1,2-diyl     | C $\equiv$ CH         | H              | -1230.237478          | 2.0732                | -1230.234114                                  | 2.0718                |
| benzene-1,2-diyl     | Me                    | Me             | -1232.719173          | 2.0672                | -1232.718758                                  | 2.0671                |
| benzene-1,2-diyl     | NH <sub>2</sub>       | H              | -1209.454598          | 2.0647                | – <sup>c</sup>                                | – <sup>c</sup>        |
| benzene-1,2-diyl     | Cl                    | Cl             | -2073.316784          | 2.0690                | – <sup>c</sup>                                | – <sup>c</sup>        |
| benzene-1,2-diyl     | CN                    | CN             | -1338.596647          | 2.0771                | – <sup>c</sup>                                | – <sup>c</sup>        |
| benzene-1,2-diyl     | C $\equiv$ CH         | C $\equiv$ CH  | -1306.389674          | 2.0833                | – <sup>c</sup>                                | – <sup>c</sup>        |
| benzene-1,2-diyl     | –COCH=CHCO–           | –              | -1456.983906          | 2.0625                | -1456.979787                                  | 2.0607                |
| benzene-1,2-diyl     | –NHCONH–              | –              | -1376.962508          | 2.0680                | – <sup>c</sup>                                | – <sup>c</sup>        |
| benzene-1,2-diyl     | naphthalene-1,8-diyl  | –              | -1537.619680          | 2.0654                | – <sup>c</sup>                                | – <sup>c</sup>        |
| benzene-1,2-diyl     | –COOCO–               | –              | -1454.819775          | 2.0647                | – <sup>c</sup>                                | – <sup>c</sup>        |
| benzene-1,2-diyl     | benzene-1,2-diyl      | –              | -1383.911798          | 2.0736                | – <sup>c</sup>                                | – <sup>c</sup>        |
| benzene-1,2-diyl     | phenanthrene-4,5-diyl | –              | -1691.280651          | 2.0635                | – <sup>c</sup>                                | – <sup>c</sup>        |
| naphthalene-1,8-diyl | H                     | H              | -1768.793522          | 2.0635                | – <sup>c</sup>                                | – <sup>c</sup>        |
| naphthalene-2,3-diyl | H                     | H              | -1768.793970          | 2.0628                | -1768.744474                                  | 2.0437                |
| thiophene-3,4-diyl   | H                     | H              | -2437.155377          | 2.0644                | -2437.06124                                   | 2.0255                |
| pyrrole-3,4-diyl     | H                     | H              | -1065.756693          | 2.0649                | – <sup>c</sup>                                | – <sup>c</sup>        |
| furan-3,4-diyl       | H                     | H              | -1145.208434          | 2.0661                | – <sup>c</sup>                                | – <sup>c</sup>        |
| benzene-1,2-diyl     | aza                   | H              | -1170.112278          | 2.0578                | -1170.097276                                  | 2.0526                |
| benzene-1,2-diyl     | aza                   | aza            | -1186.139607          | 2.0537                | -1186.133714                                  | 2.0518                |
| furan-3,4-diyl       | aza                   | H              | – <sup>d</sup>        | – <sup>d</sup>        | – <sup>c</sup>                                | – <sup>c</sup>        |
| furan-3,4-diyl       | aza                   | aza            | -1177.260914          | 2.0575                | -1177.181762                                  | 2.0333                |

<sup>a</sup> Electronic energies (Hartrees). <sup>b</sup> Relative electronic energies (kcal mol<sup>-1</sup>). <sup>c</sup> Structure could not be obtained. <sup>d</sup> SCF convergence not achieved.

**Table S6. Pure singlet UB3LYP/6-311+G(d)//RB3LYP/6-311+G(d) electronic energies.**

| Ar                   | R <sup>1</sup>        | R <sup>2</sup> | localised structure |                | delocalised structure |              | localised $\rightleftharpoons$ delocalised TS |                         |
|----------------------|-----------------------|----------------|---------------------|----------------|-----------------------|--------------|-----------------------------------------------|-------------------------|
|                      |                       |                | E <sup>a</sup>      | $\Delta E^b$   | E <sup>a</sup>        | $\Delta E^b$ | E <sup>a</sup>                                | $\Delta E^{\ddagger b}$ |
| benzene-1,2-diyl     | H                     | H              | -1154.100892        | 0.0            | -1154.110035          | -5.7         | -1154.099587                                  | 0.8                     |
| benzene-1,2-diyl     | F                     | H              | -1253.373035        | 0.0            | -1253.379712          | -4.2         | -1253.374904                                  | -1.2                    |
| benzene-1,2-diyl     | Me                    | H              | -1193.421983        | 0.0            | -1193.427418          | -3.4         | -1193.422881                                  | -0.6                    |
| benzene-1,2-diyl     | NO <sub>2</sub>       | H              | -1358.657686        | 0.0            | -1358.663072          | -3.4         | -1358.655816                                  | 1.2                     |
| benzene-1,2-diyl     | Cl                    | H              | -1613.722788        | 0.0            | -1613.727654          | -3.1         | -1613.723515                                  | -0.5                    |
| benzene-1,2-diyl     | F                     | F              | -1352.643144        | 0.0            | -1352.648733          | -3.5         | -1352.645704                                  | -1.6                    |
| benzene-1,2-diyl     | CN                    | H              | -1246.365931        | 0.0            | -1246.370080          | -2.6         | -1246.366706                                  | -0.5                    |
| benzene-1,2-diyl     | C $\equiv$ CH         | H              | -1230.261370        | 0.0            | -1230.265222          | -2.4         | -1230.263790                                  | -1.5                    |
| benzene-1,2-diyl     | Me                    | Me             | -1232.742516        | 0.0            | -1232.745312          | -1.8         | -1232.745104                                  | -1.6                    |
| benzene-1,2-diyl     | NH <sub>2</sub>       | H              | -1209.476524        | 0.0            | -1209.479650          | -2.0         | – <sup>c</sup>                                | – <sup>c</sup>          |
| benzene-1,2-diyl     | Cl                    | Cl             | -2073.343216        | 0.0            | -2073.345187          | -1.2         | – <sup>c</sup>                                | – <sup>c</sup>          |
| benzene-1,2-diyl     | CN                    | CN             | -1338.628064        | 0.0            | -1338.627697          | 0.2          | – <sup>c</sup>                                | – <sup>c</sup>          |
| benzene-1,2-diyl     | C $\equiv$ CH         | C $\equiv$ CH  | -1306.421201        | 0.0            | -1306.421741          | -0.3         | – <sup>c</sup>                                | – <sup>c</sup>          |
| benzene-1,2-diyl     | –COCH=CHCO–           | –              | -1457.013067        | 0.0            | -1457.014774          | -1.1         | -1457.015482                                  | -1.5                    |
| benzene-1,2-diyl     | –NHCONH–              | –              | -1376.997905        | 0.0            | -1376.997520          | 0.2          | – <sup>c</sup>                                | – <sup>c</sup>          |
| benzene-1,2-diyl     | naphthalene-1,8-diyl  | –              | -1537.655178        | 0.0            | -1537.653899          | 0.8          | – <sup>c</sup>                                | – <sup>c</sup>          |
| benzene-1,2-diyl     | –COOCO–               | –              | -1454.858697        | 0.0            | -1454.855838          | 1.8          | – <sup>c</sup>                                | – <sup>c</sup>          |
| benzene-1,2-diyl     | benzene-1,2-diyl      | –              | -1383.955487        | 0.0            | -1383.950600          | 3.1          | – <sup>c</sup>                                | – <sup>c</sup>          |
| benzene-1,2-diyl     | phenanthrene-4,5-diyl | –              | -1691.315812        | 0.0            | -1691.314118          | 1.1          | – <sup>c</sup>                                | – <sup>c</sup>          |
| naphthalene-1,8-diyl | H                     | H              | -1768.901955        | 0.0            | -1768.891065          | 6.8          | – <sup>c</sup>                                | – <sup>c</sup>          |
| naphthalene-2,3-diyl | H                     | H              | -1768.803499        | 0.0            | -1768.815832          | -7.7         | -1768.803050                                  | 0.3                     |
| thiophene-3,4-diyl   | H                     | H              | -2437.134620        | 0.0            | -2437.160285          | -16.1        | -2437.251100                                  | -73.1                   |
| pyrrole-3,4-diyl     | H                     | H              | – <sup>c</sup>      | – <sup>c</sup> | -1065.757109          |              | – <sup>c</sup>                                | – <sup>c</sup>          |
| furan-3,4-diyl       | H                     | H              | – <sup>c</sup>      | – <sup>c</sup> | -1145.208709          |              | – <sup>c</sup>                                | – <sup>c</sup>          |
| benzene-1,2-diyl     | aza                   | H              | -1170.140725        | 0.0            | -1170.144044          | -2.1         | -1170.138795                                  | 1.2                     |
| benzene-1,2-diyl     | aza                   | aza            | -1186.177220        | 0.0            | -1186.176355          | 0.5          | -1186.176589                                  | 0.4                     |
| furan-3,4-diyl       | aza                   | H              | – <sup>c</sup>      | – <sup>c</sup> |                       | 0.0          | – <sup>c</sup>                                | – <sup>c</sup>          |
| furan-3,4-diyl       | aza                   | aza            | -1177.235771        | 0.0            | -1177.264230          | -17.9        | -1177.235432                                  | 0.2                     |

Calculations obtained by using the Kraka formula.<sup>S1</sup> <sup>a</sup> Electronic energies (Hartrees). <sup>b</sup> Relative electronic energies (kcal mol<sup>-1</sup>). <sup>c</sup> Structure could not be obtained.

**Table S7. Pure singlet UB3LYP/6-311+G(d)//RB3LYP/6-311+G(d) Gibbs free energies.**

| Ar                   | R <sup>1</sup>        | R <sup>2</sup> | localised structure |                | delocalised structure |                | localised $\rightleftharpoons$ delocalised TS |                 |
|----------------------|-----------------------|----------------|---------------------|----------------|-----------------------|----------------|-----------------------------------------------|-----------------|
|                      |                       |                | G <sup>a</sup>      | $\Delta G^b$   | G <sup>a</sup>        | $\Delta G^b$   | G <sup>a</sup>                                | $\Delta G^{*b}$ |
| benzene-1,2-diyl     | H                     | H              | -1153.772854        | 0.0            | -1153.782256          | -5.9           | -1153.771548                                  | 0.8             |
| benzene-1,2-diyl     | F                     | H              | -1253.053910        | 0.0            | -1253.062141          | -5.2           | -1253.055779                                  | -1.2            |
| benzene-1,2-diyl     | Me                    | H              | -1193.067420        | 0.0            | -1193.074812          | -4.6           | -1193.068319                                  | -0.6            |
| benzene-1,2-diyl     | NO <sub>2</sub>       | H              | -1358.331719        | 0.0            | -1358.338193          | -4.1           | -1358.329848                                  | 1.2             |
| benzene-1,2-diyl     | Cl                    | H              | -1613.405981        | 0.0            | -1613.412683          | -4.2           | -1613.406708                                  | -0.5            |
| benzene-1,2-diyl     | F                     | F              | -1352.333029        | 0.0            | -1352.340330          | -4.6           | -1352.335589                                  | -1.6            |
| benzene-1,2-diyl     | CN                    | H              | -1246.041731        | 0.0            | -1246.047653          | -3.7           | -1246.042507                                  | -0.5            |
| benzene-1,2-diyl     | C $\equiv$ CH         | H              | -1229.927205        | 0.0            | -1229.933355          | -3.9           | -1229.929625                                  | -1.5            |
| benzene-1,2-diyl     | Me                    | Me             | -1232.361845        | 0.0            | -1232.366927          | -3.2           | -1232.364433                                  | -1.6            |
| benzene-1,2-diyl     | NH <sub>2</sub>       | H              | -1209.131918        | 0.0            | -1209.136104          | -2.6           | – <sup>c</sup>                                | – <sup>c</sup>  |
| benzene-1,2-diyl     | Cl                    | Cl             | -2073.037812        | 0.0            | -2073.040584          | -1.7           | – <sup>c</sup>                                | – <sup>c</sup>  |
| benzene-1,2-diyl     | CN                    | CN             | -1338.307696        | 0.0            | -1338.308112          | -0.3           | – <sup>c</sup>                                | – <sup>c</sup>  |
| benzene-1,2-diyl     | C $\equiv$ CH         | C $\equiv$ CH  | -1306.080894        | 0.0            | -1306.082367          | -0.9           | – <sup>c</sup>                                | – <sup>c</sup>  |
| benzene-1,2-diyl     | –COCH=CHCO–           | –              | -1456.659010        | 0.0            | -1456.662334          | -2.1           | -1456.661425                                  | -1.5            |
| benzene-1,2-diyl     | –NHCONH–              | –              | -1376.650074        | 0.0            | -1376.651011          | -0.6           | – <sup>c</sup>                                | – <sup>c</sup>  |
| benzene-1,2-diyl     | naphthalene-1,8-diyl  | –              | -1537.227713        | 0.0            | -1537.227421          | 0.2            | – <sup>c</sup>                                | – <sup>c</sup>  |
| benzene-1,2-diyl     | –COOCO–               | –              | -1454.531940        | 0.0            | -1454.529878          | 1.3            | – <sup>c</sup>                                | – <sup>c</sup>  |
| benzene-1,2-diyl     | benzene-1,2-diyl      | –              | -1383.572198        | 0.0            | -1383.567668          | 2.8            | – <sup>c</sup>                                | – <sup>c</sup>  |
| benzene-1,2-diyl     | phenanthrene-4,5-diyl | –              | -1690.845597        | 0.0            | -1690.844099          | 0.9            | – <sup>c</sup>                                | – <sup>c</sup>  |
| naphthalene-1,8-diyl | H                     | H              | -1768.396714        | 0.0            | -1768.386332          | 6.5            | – <sup>c</sup>                                | – <sup>c</sup>  |
| naphthalene-2,3-diyl | H                     | H              | -1768.303637        | 0.0            | -1768.315387          | -7.4           | -1768.303188                                  | 0.3             |
| thiophene-3,4-diyl   | H                     | H              | -2436.940774        | 0.0            | -2436.965378          | -15.4          | -2437.057254                                  | -73.1           |
| pyrrole-3,4-diyl     | H                     | H              | – <sup>c</sup>      | – <sup>c</sup> | -1065.497747          | –              | – <sup>c</sup>                                | – <sup>c</sup>  |
| furan-3,4-diyl       | H                     | H              | – <sup>c</sup>      | – <sup>c</sup> | -1145.052186          | –              | – <sup>c</sup>                                | – <sup>c</sup>  |
| benzene-1,2-diyl     | aza                   | H              | -1169.824730        | 0.0            | -1169.829494          | -3.0           | -1169.822800                                  | 1.2             |
| benzene-1,2-diyl     | aza                   | aza            | -1185.873497        | 0.0            | -1185.873917          | -0.3           | -1185.872866                                  | 0.4             |
| furan-3,4-diyl       | aza                   | H              | – <sup>c</sup>      | – <sup>c</sup> | – <sup>d</sup>        | – <sup>d</sup> | – <sup>c</sup>                                | – <sup>c</sup>  |
| furan-3,4-diyl       | aza                   | aza            | -1177.048379        | 0.0            | -1177.077277          | -18.1          | -1177.048040                                  | 0.2             |

Calculations obtained by using the Kraka formula from singlet and triplet states for UB3LYP/6-311+G(d)//RB3LYP/6-311+G(d) calculations.<sup>S1</sup> <sup>a</sup> Sum of electronic and thermal free energies (Hartrees). <sup>b</sup> Relative Gibbs free energies (kcal mol<sup>-1</sup>). <sup>c</sup> Structure could not be obtained. <sup>d</sup> SCF convergence of the triplet-state UB3LYP wavefunction was not achieved.

**Table S8. NICS values for delocalised structures.**

| Ar                   | R <sup>1</sup>        | R <sup>2</sup> | NICS (0) | NICS (1) | NICS (-1) |
|----------------------|-----------------------|----------------|----------|----------|-----------|
| benzene-1,2-diyl     | H                     | H              | -7.8122  | -3.0651  | -7.4170   |
| benzene-1,2-diyl     | F                     | H              | -7.1746  | -1.2508  | -4.5096   |
| benzene-1,2-diyl     | Me                    | H              | -7.5722  | -0.7971  | -5.5466   |
| benzene-1,2-diyl     | NO <sub>2</sub>       | H              | -6.8963  | -1.1613  | -3.2201   |
| benzene-1,2-diyl     | Cl                    | H              | -7.0901  | -0.9187  | -4.7464   |
| benzene-1,2-diyl     | F                     | F              | -7.3036  | -1.7844  | -3.1360   |
| benzene-1,2-diyl     | CN                    | H              | -7.1148  | -1.1284  | -4.6230   |
| benzene-1,2-diyl     | C≡CH                  | H              | -6.9312  | -0.9293  | -4.6902   |
| benzene-1,2-diyl     | Me                    | Me             | -5.7726  | 0.2475   | -5.3664   |
| benzene-1,2-diyl     | NH <sub>2</sub>       | H              | -6.7001  | -0.5436  | -4.6734   |
| benzene-1,2-diyl     | Cl                    | Cl             | -6.4732  | -0.6133  | -3.7489   |
| benzene-1,2-diyl     | CN                    | CN             | -7.2010  | -1.4026  | -3.8219   |
| benzene-1,2-diyl     | C≡CH                  | C≡CH           | -6.7267  | -0.7125  | -4.2448   |
| benzene-1,2-diyl     | -COCH=CHCO-           | -              | -6.4489  | -1.5960  | -2.2645   |
| benzene-1,2-diyl     | -NHCONH-              | -              | -10.7371 | -2.0451  | -6.1570   |
| benzene-1,2-diyl     | naphthalene-1,8-diyl  | -              | -12.1676 | -1.6852  | -2.0465   |
| benzene-1,2-diyl     | -COOCO-               | -              | -12.8286 | -2.5498  | -6.2439   |
| benzene-1,2-diyl     | benzene-1,2-diyl      | -              | -15.6918 | -2.5996  | -10.0839  |
| benzene-1,2-diyl     | phenanthrene-4,5-diyl | -              | -8.1157  | -0.4546  | -2.4491   |
| naphthalene-1,8-diyl | H                     | H              | -15.3263 | -6.0956  | -10.3720  |
| naphthalene-2,3-diyl | H                     | H              | -4.9050  | -0.3774  | -4.8506   |
| thiophene-3,4-diyl   | H                     | H              | -3.6276  | -0.8905  | -2.8090   |
| pyrrole-3,4-diyl     | H                     | H              | -3.3994  | -0.8244  | -3.1432   |
| furan-3,4-diyl       | H                     | H              | -4.6707  | -2.1237  | -3.8957   |
| benzene-1,2-diyl     | aza                   | H              | -8.7797  | -0.7124  | -5.7872   |
| benzene-1,2-diyl     | aza                   | aza            | -10.8860 | -0.7230  | -6.9455   |
| furan-3,4-diyl       | aza                   | H              | -3.5243  | -2.3474  | -3.5716   |
| furan-3,4-diyl       | aza                   | aza            | -4.7020  | -0.6396  | -3.2132   |

Singlet-state UB3LYP/6-311+G(d)//RB3LYP/6-311+G(d) calculations.

**Table S9. Isotropic magnetic susceptibilities.**

| Ar                   | R <sup>1</sup>        | R <sup>2</sup> | localised structure | delocalised structure |               |
|----------------------|-----------------------|----------------|---------------------|-----------------------|---------------|
|                      |                       |                | $\chi$              | $\chi$                | $\Delta \chi$ |
| benzene-1,2-diyl     | H                     | H              | -115.9804           | -53.6717              | 62.3087       |
| benzene-1,2-diyl     | F                     | H              | -130.9474           | -97.1960              | 33.7514       |
| benzene-1,2-diyl     | Me                    | H              | -104.2974           | -99.7127              | 4.5847        |
| benzene-1,2-diyl     | NO <sub>2</sub>       | H              | -106.8726           | -162.9477             | -56.0751      |
| benzene-1,2-diyl     | Cl                    | H              | -126.6451           | -98.9107              | 27.7344       |
| benzene-1,2-diyl     | F                     | F              | -123.3006           | -47.8201              | 75.4805       |
| benzene-1,2-diyl     | CN                    | H              | -133.2188           | -163.7740             | -30.5552      |
| benzene-1,2-diyl     | C≡CH                  | H              | -187.3886           | -175.9505             | 11.4381       |
| benzene-1,2-diyl     | Me                    | Me             | -52.2288            | -13.6779              | 38.5509       |
| benzene-1,2-diyl     | NH <sub>2</sub>       | H              | -102.4002           | -58.5974              | 43.8028       |
| benzene-1,2-diyl     | Cl                    | Cl             | -58.5555            | -88.9214              | -30.3659      |
| benzene-1,2-diyl     | CN                    | CN             | -71.5685            | -138.8721             | -67.3036      |
| benzene-1,2-diyl     | C≡CH                  | C≡CH           | -106.1582           | -138.6201             | -32.4619      |
| benzene-1,2-diyl     | -COCH=CHCO-           | -              | -153.3849           | -14.1726              | 139.2123      |
| benzene-1,2-diyl     | -NHCONH-              | -              | -99.6966            | -118.2847             | -18.5881      |
| benzene-1,2-diyl     | naphthalene-1,8-diyl  | -              | -86.6448            | -8.0513               | 78.5935       |
| benzene-1,2-diyl     | -COOCO-               | -              | -57.4671            | -117.8085             | -60.3414      |
| benzene-1,2-diyl     | benzene-1,2-diyl      | -              | -44.1553            | 93.7166               | 137.8719      |
| benzene-1,2-diyl     | phenanthrene-4,5-diyl | -              | -190.8229           | -120.4407             | 70.3822       |
| naphthalene-1,8-diyl | H                     | H              | -91.6831            | -101.6509             | -9.9678       |
| naphthalene-2,3-diyl | H                     | H              | -193.0071           | -146.2267             | 46.7804       |
| thiophene-3,4-diyl   | H                     | H              | -126.0942           | -147.1796             | -21.0854      |
| pyrrole-3,4-diyl     | H                     | H              | - <sup>a</sup>      | -127.6876             | -127.6876     |
| furan-3,4-diyl       | H                     | H              | - <sup>a</sup>      | -109.2152             | -109.2152     |
| benzene-1,2-diyl     | aza                   | H              | -142.0743           | -108.7806             | 33.2937       |
| benzene-1,2-diyl     | aza                   | aza            | -140.6809           | -147.1611             | -6.4802       |
| furan-3,4-diyl       | aza                   | H              | - <sup>a</sup>      | -112.8256             | -112.8256     |
| furan-3,4-diyl       | aza                   | aza            | -83.6701            | -103.9644             | -20.2943      |

Isotropic magnetic susceptibilities (cgs-ppm) obtained from singlet-state UB3LYP/6-311+G(d)//RB3LYP/6-311+G(d) calculations. <sup>a</sup> Structure could not be obtained.

## Selected properties of all structures

### 1,5-Hexadiene, boat-shaped Cope rearrangement TS

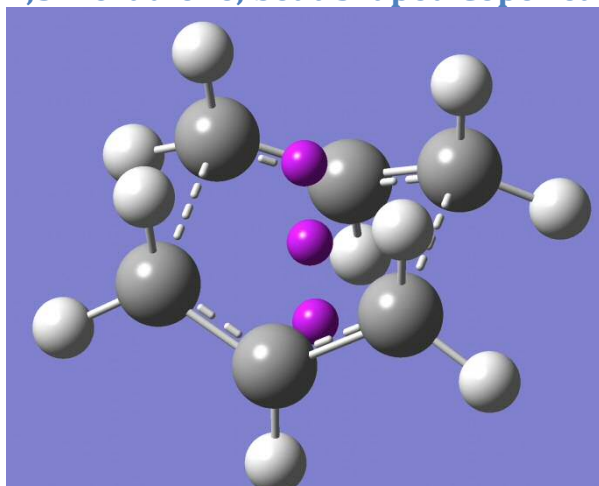

**RB3LYP/6-311+G(d) level:**  
**C-C bond length:** 2.24919 Å  
**Electronic energy:** -234.598905 Hartrees  
**Gibbs free energy:** -234.488245 Hartrees  
**Imaginary frequency:** 501.4i cm<sup>-1</sup>  
**Point group:** C<sub>2v</sub>

#### Cartesian coordinates:

```
C,0,0.1757380105,-1.2196278551,1.1245948523
C,0,0.1757380105,-1.2196278551,-1.1245948523
C,0,0.1757379221,1.2196279548,-1.1245948523
C,0,0.1757379221,1.2196279548,1.1245948523
C,0,-0.4154513082,0.0000000284,1.4304962282
C,0,-0.4154513082,0.0000000284,-1.4304962282
H,0,-1.4890023444,-0.0000000105,1.6161719318
H,0,-1.4890023444,-0.0000000105,-1.6161719318
H,0,1.2571376693,1.301087418,1.1204707409
H,0,-0.3482159772,2.1442920883,1.3412508974
H,0,1.2571377635,-1.30108724,1.1204707409
H,0,-0.3482158218,-2.1442920266,1.3412508974
H,0,-0.3482158218,-2.1442920266,-1.3412508974
H,0,1.2571377635,-1.30108724,-1.1204707409
H,0,-0.3482159772,2.1442920883,-1.3412508974
H,0,1.2571376693,1.301087418,-1.1204707409
Bq,0,-0.02132513,0.00000004,0,0.00000000
Bq,0,0.97867487,0,0.00000004,0,0.00000000
Bq,0,-1.02132513,0,0.00000004,0,0.00000000
```

**UB3LYP/6-311+G(d)//RB3LYP/6-311+G(d) level:**  
**Electronic energy (singlet):** -234.598905 Hartrees  
**<S<sup>2</sup>> (singlet):** 0.0000  
**NICS(0):** -20.9006 ppm  
**NICS(1):** -10.6357 ppm  
**NICS(-1):** -15.2510 ppm  
**Isotropic magnetic susceptibility:** -74.5927 cgs-ppm  
**Electronic energy (triplet):** -234.463820 Hartrees  
**<S<sup>2</sup>> (triplet):** 2.0626

Ar = benzene-1,2-diyl, R<sup>1</sup> = R<sup>2</sup> = H, localised structure

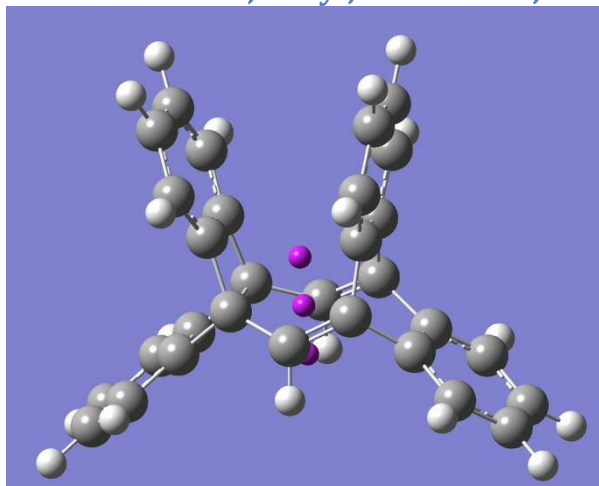

**RB3LYP/6-311+G(d) level:**  
**Allyl-allyl C–C bond length:** 1.78794 Å  
**Distance between terminal allyl C atoms:** 2.44737 Å  
**Sum of bond angles for terminal allyl C:** 350.984°  
**Electronic energy:** -1154.100892 Hartrees  
**Gibbs free energy:** -1153.772854 Hartrees  
**No imaginary frequencies**  
**Point group:** *C<sub>s</sub>*

**UB3LYP/6-311+G(d)//RB3LYP/6-311+G(d) level:**  
**Electronic energy (singlet):** -1154.100892 Hartrees  
**<S<sup>2</sup>> (singlet):** 0.0000  
**NICS(0):** -1.8839 ppm  
**NICS(1):** 0.3222 ppm  
**NICS(-1):** -3.1708 ppm  
**Isotropic magnetic susceptibility:** -115.9804 cgs-ppm

**Cartesian coordinates:**

```
C,0,0.1810442538,1.3744728766,1.2236866409
C,0,0.1810442538,1.3744728766,-1.2236866409
C,0,0.4332789285,-1.1070049753,-0.8939680819
C,0,0.4332789285,-1.1070049753,0.8939680819
C,0,-0.9752720697,-1.6565269206,0.6957112705
C,0,-0.9752720697,-1.6565269206,-0.6957112705
C,0,-2.0215934517,-2.1855162514,-1.4324603006
C,0,-3.0959778821,-2.7101368157,0.6993418774
C,0,-3.0959778821,-2.7101368157,-0.6993418774
H,0,-3.9481852672,-3.1277659269,1.2265554848
H,0,-3.9481852672,-3.1277659269,-1.2265554848
C,0,-1.2216845104,1.4314716464,-0.7009215755
C,0,-1.2216845104,1.4314716464,0.7009215755
C,0,-2.4123655672,1.5356531783,-1.4075783952
C,0,-3.6126853287,1.6373957534,-0.6968399277
C,0,-3.6126853287,1.6373957534,0.6968399277
H,0,-4.5513448961,1.7181875815,-1.2358076969
H,0,-4.5513448961,1.7181875815,1.2358076969
H,0,-2.0307387012,-2.1931173767,-2.5177762355
H,0,-2.4117462166,1.5344232779,-2.4930773748
C,0,1.5030900441,-2.1817825784,0.6965834536
C,0,1.5030900441,-2.1817825784,-0.6965834536
C,0,2.3179630971,-3.0254604725,1.4321278817
C,0,2.3179630971,-3.0254604725,-1.4321278817
C,0,3.1544943288,-3.8821485278,0.6987635538
H,0,2.3321087926,-3.0287277639,2.5176956512
C,0,3.1544943288,-3.8821485278,-0.6987635538
H,0,2.3321087926,-3.0287277639,-2.5176956512
H,0,3.819931775,-4.5583799142,1.2263965128
H,0,3.819931775,-4.5583799142,-1.2263965128
C,0,0.9702083657,2.5638742,0.7111397114
C,0,1.6552859277,3.5478096182,1.4068804573
C,0,0.9702083657,2.5638742,-0.7111397114
C,0,2.3493552405,4.5365550938,0.6953468578
H,0,1.6617459456,3.5460649684,2.4925465277
C,0,1.6552859277,3.5478096182,-1.4068804573
C,0,2.3493552405,4.5365550938,-0.6953468578
H,0,2.88803772,5.3081441909,1.2362440909
H,0,1.6617459456,3.5460649684,-2.4925465277
H,0,2.88803772,5.3081441909,-1.2362440909
C,0,-2.0215934517,-2.1855162514,1.4324603006
H,0,-2.0307387012,-2.1931173767,2.5177762355
C,0,-2.4123655672,1.5356531783,1.4075783952
H,0,-2.4117462166,1.5344232779,2.4930773748
C,0,0.8378935156,0.2098034799,1.4346613843
H,0,1.9069289367,0.2877217839,1.6250378955
C,0,0.8378935156,0.2098034799,-1.4346613843
H,0,1.9069289367,0.2877217839,-1.6250378955
Bq,0,0.484072233,0.15909046,0.
Bq,0,-0.511070041,0.060643241,0.
Bq,0,1.479214506,0.25753768,0.
```

Ar = benzene-1,2-diyl, R<sup>1</sup> = R<sup>2</sup> = H, delocalised structure

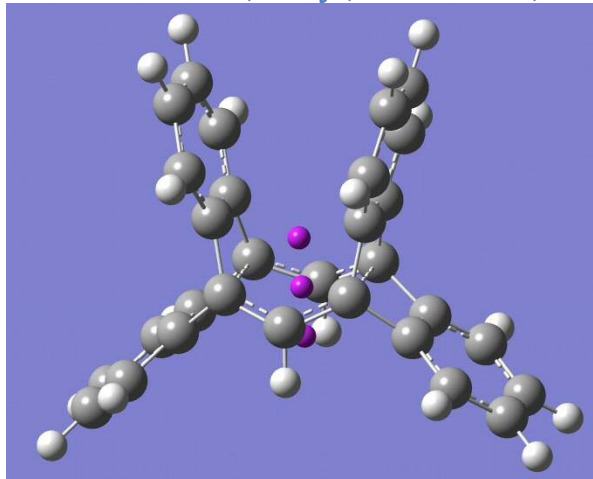

**RB3LYP/6-311+G(d) level:**  
**C<sup>∞</sup>C bond length:** 2.29388 Å  
**Electronic energy:** -1154.100103 Hartrees  
**Gibbs free energy:** -1153.772324 Hartrees  
**No imaginary frequencies**  
**Point group:** C<sub>2v</sub>

**UB3LYP/6-311+G(d)//RB3LYP/6-311+G(d) level:**  
**Electronic energy (singlet):** -1154.103588 Hartrees  
**<S<sup>2</sup>> (singlet):** 0.5391  
**NICS(0):** -7.8122 ppm  
**NICS(1):** -3.0651 ppm  
**NICS(-1):** -7.4170 ppm  
**Isotropic magnetic susceptibility:** -53.6717 cgs-ppm  
**Electronic energy (triplet):** -1154.085367 Hartrees  
**<S<sup>2</sup>> (triplet):** 2.0626

**Cartesian coordinates:**

```
C,0,-1.251101305,1.1469387341,-0.2989985538
C,0,-1.251101305,-1.1469387341,-0.2989985538
C,0,1.251101305,-1.1469387341,-0.2989985538
C,0,1.251101305,1.1469387341,-0.2989985538
C,0,1.5305618797,0.6969341549,1.1113145221
C,0,1.5305618797,-0.6969341549,1.1113145221
C,0,1.8518711834,-1.4151565377,2.2538871982
C,0,2.1688682462,0.6974448114,3.4141143454
C,0,2.1688682462,-0.6974448114,3.4141143454
H,0,2.4167761879,1.2326745081,4.3253134301
H,0,2.4167761879,-1.2326745081,4.3253134301
C,0,-1.5305618797,-0.6969341549,1.1113145221
C,0,-1.5305618797,0.6969341549,1.1113145221
C,0,-1.8518711834,-1.4151565377,2.2538871982
C,0,-2.1688682462,-0.6974448114,3.4141143454
C,0,-2.1688682462,0.6974448114,3.4141143454
H,0,-2.4167761879,-1.2326745081,4.3253134301
H,0,-2.4167761879,1.2326745081,4.3253134301
H,0,1.849992272,-2.5008352984,2.2559340404
H,0,-1.849992272,-2.5008352984,2.2559340404
C,0,2.3589537312,0.7020296307,-1.2378312173
C,0,2.3589537312,-0.7020296307,-1.2378312173
C,0,3.2571917158,1.4147999858,-2.0159815333
C,0,3.2571917158,-1.4147999858,-2.0159815333
C,0,4.1654335724,0.6962177073,-2.8090469266
H,0,3.2491593463,2.5006394816,-2.0294224155
C,0,4.1654335724,-0.6962177073,-2.8090469266
H,0,3.2491593463,-2.5006394816,-2.0294224155
H,0,4.8727576384,1.232707727,-3.4335457295
H,0,4.8727576384,-1.232707727,-3.4335457295
C,0,-2.3589537312,0.7020296307,-1.2378312173
C,0,-3.2571917158,1.4147999858,-2.0159815333
C,0,-2.3589537312,-0.7020296307,-1.2378312173
C,0,-4.1654335724,0.6962177073,-2.8090469266
H,0,-3.2491593463,2.5006394816,-2.0294224155
C,0,-3.2571917158,-1.4147999858,-2.0159815333
C,0,-4.1654335724,-0.6962177073,-2.8090469266
H,0,-4.8727576384,1.232707727,-3.4335457295
H,0,-3.2491593463,-2.5006394816,-2.0294224155
H,0,-4.8727576384,-1.232707727,-3.4335457295
C,0,1.8518711834,1.4151565377,2.2538871982
H,0,1.849992272,2.5008352984,2.2559340404
C,0,-1.8518711834,1.4151565377,2.2538871982
H,0,-1.849992272,2.5008352984,2.2559340404
C,0,0.,1.460833639,-0.8336765726
H,0,0.,1.6373797819,-1.9078619284
C,0,0.,-1.460833639,-0.8336765726
H,0,0.,-1.6373797819,-1.9078619284
Bq,0,0.,0.,-0.47722456
Bq,0,0.,0.,0.52277544
Bq,0,0.,0.,-1.47722456
```



Ar = benzene-1,2-diyl, R<sup>1</sup> = R<sup>2</sup> = H, localised  $\rightleftharpoons$  delocalised TS

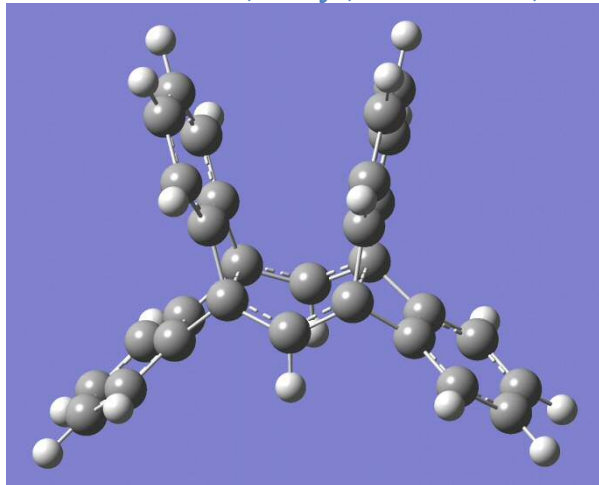

**RB3LYP/6-311+G(d) level:**  
**C<sup>∞</sup>C bond lengths:** 2.06480 Å, 2.39382 Å  
**Electronic energy:** -1154.099587 Hartrees  
**Gibbs free energy:** -1153.772399 Hartrees  
**Imaginary frequency:** 217.0i cm<sup>-1</sup>  
**Point group:** C<sub>s</sub>

**UB3LYP/6-311+G(d)//RB3LYP/6-311+G(d) level:**  
**Electronic energy (singlet):** -1154.099587 Hartrees  
**<S<sup>2</sup>> (singlet):** 0.0000  
**Electronic energy (triplet):** 2.0519 Hartrees  
**<S<sup>2</sup>> (triplet):**

**Cartesian coordinates:**

```
C,0,0.1653770798,1.3199629813,1.1969123889
C,0,0.1653770798,1.3199629813,-1.1969123889
C,0,0.4400967003,-1.1623358181,-1.0323975508
C,0,0.4400967003,-1.1623358181,1.0323975508
C,0,-0.9480741507,-1.6597578959,0.6951395986
C,0,-0.9480741507,-1.6597578959,-0.6951395986
C,0,-2.0185504549,-2.1539690256,-1.4240110144
C,0,-3.1121785788,-2.6460360193,0.6983738849
C,0,-3.1121785788,-2.6460360193,-0.6983738849
H,0,-3.9757974819,-3.0338622275,1.2294989536
H,0,-3.9757974819,-3.0338622275,-1.2294989536
C,0,-1.2504289678,1.3983311844,-0.6990089043
C,0,-1.2504289678,1.3983311844,0.6990089043
C,0,-2.4336507115,1.5414392139,-1.4104305903
C,0,-3.6298414736,1.6797494901,-0.6970890809
C,0,-3.6298414736,1.6797494901,0.6970890809
H,0,-4.5665943825,1.7885713397,-1.2345367186
H,0,-4.5665943825,1.7885713397,1.2345367186
H,0,-2.0246695785,-2.1549393665,-2.5095096572
H,0,-2.4336169768,1.5405820316,-2.4960973801
C,0,1.505792022,-2.1948820974,0.6982895279
C,0,1.505792022,-2.1948820974,-0.6982895279
C,0,2.3541750395,-3.0152322494,1.4235490757
C,0,2.3541750395,-3.0152322494,-1.4235490757
C,0,3.221924037,-3.8466181838,0.6973954837
H,0,2.3694044408,-3.0092833637,2.5092325022
C,0,3.221924037,-3.8466181838,-0.6973954837
H,0,2.3694044408,-3.0092833637,-2.5092325022
H,0,3.9097141314,-4.4963896605,1.2293643679
H,0,3.9097141314,-4.4963896605,-1.2293643679
C,0,0.9606811227,2.516726773,0.7062541075
C,0,1.635646527,3.5018407644,1.4100193361
C,0,0.9606811227,2.516726773,-0.7062541075
C,0,2.3223798976,4.4948758903,0.6957477144
H,0,1.6451051641,3.4974340846,2.495863878
C,0,1.635646527,3.5018407644,-1.4100193361
C,0,2.3223798976,4.4948758903,-0.6957477144
H,0,2.8588930467,5.2692702453,1.2348315795
H,0,1.6451051641,3.4974340846,-2.495863878
H,0,2.8588930467,5.2692702453,-1.2348315795
C,0,-2.0185504549,-2.1539690256,1.4240110144
H,0,-2.0246695785,-2.1549393665,2.5095096572
C,0,-2.4336507115,1.5414392139,1.4104305903
H,0,-2.4336169768,1.5405820316,2.4960973801
C,0,0.8327268369,0.1496123701,1.4503364025
H,0,1.9019757211,0.2512326632,1.6278030587
C,0,0.8327268369,0.1496123701,-1.4503364025
H,0,1.9019757211,0.2512326632,-1.6278030587
```

Ar = benzene-1,2-diyl, R<sup>1</sup> = F, R<sup>2</sup> = H, localised structure

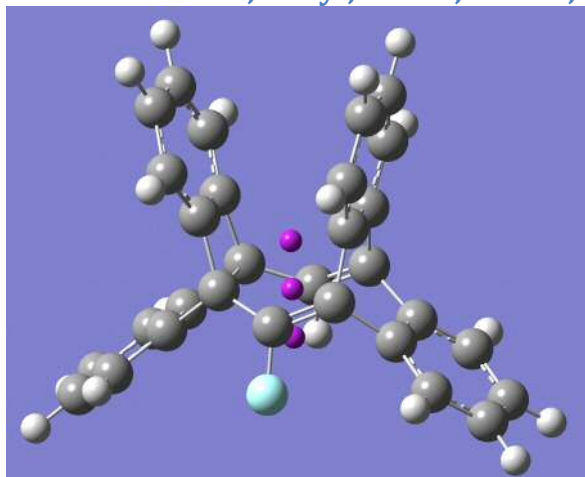

**RB3LYP/6-311+G(d) level:**  
**Allyl-allyl C–C bond length:** 1.76476 Å  
**Distance between terminal allyl C atoms:** 2.45277 Å  
**Sum of bond angles for tertiary chloro-conjugated vinyl C:** 351.852°  
**Sum of bond angles for tertiary non-conjugated vinyl C:** 350.900°  
**Electronic energy:** -1253.373035 Hartrees  
**Gibbs free energy:** -1253.053910 Hartrees  
**No imaginary frequencies**  
**Point group:** C<sub>1</sub>

**UB3LYP/6-311+G(d)//RB3LYP/6-311+G(d) level:**  
**Electronic energy (singlet):** -1253.373035 Hartrees  
**<S<sup>2</sup>> (singlet):** 0.0000  
**NICS(0):** -2.1427 ppm  
**NICS(1):** 0.0602 ppm  
**NICS(-1):** -2.8099 ppm  
**Isotropic magnetic susceptibility:** -130.9474 cgs-ppm

**Cartesian coordinates:**

```
C,0,0.0366858903,1.3821113952,1.2104013222
C,0,0.0483220598,1.3663545517,-1.2422859155
C,0,0.2902324347,-1.1129582688,-0.9170206686
C,0,0.2905504269,-1.1135596943,0.8477413163
C,0,-1.122822111,-1.6537029919,0.6621784645
C,0,-1.1239814431,-1.6571146558,-0.7290773819
C,0,-2.1697784988,-2.1904367826,-1.4627152545
C,0,-3.2397034914,-2.7089801725,0.6741221898
C,0,-3.2417391386,-2.713433932,-0.7247739422
H,0,-4.0901051109,-3.1269958213,1.2037085564
H,0,-4.0942316637,-3.1345706859,-1.2486196802
C,0,-1.3568535764,1.4222874656,-0.7248342335
C,0,-1.3616821293,1.4215566401,0.6759495012
C,0,-2.5449286649,1.528497257,-1.4356389561
C,0,-3.7469301802,1.6299761717,-0.7278723502
C,0,-3.7517159708,1.6283851334,0.6660567823
H,0,-4.6838845527,1.7125865614,-1.2694857337
H,0,-4.6919775228,1.7101570552,1.2019105529
H,0,-2.1805218426,-2.2032704619,-2.5478364697
H,0,-2.5413032378,1.528559567,-2.5210883394
C,0,1.360971438,-2.1908991327,0.6638678677
C,0,1.3501143452,-2.2000711521,-0.7279873279
C,0,2.163827037,-3.0428109592,1.4015814215
C,0,2.1395600953,-3.0669554544,-1.4644911037
C,0,2.9753658422,-3.9213799361,0.6679486437
H,0,2.1914772708,-3.0314477432,2.4861614026
C,0,2.963557211,-3.9337179637,-0.7301852188
H,0,2.1434678759,-3.080254222,-2.5499426351
H,0,3.6331508297,-4.6049189612,1.195567681
H,0,3.6108907109,-4.6279196268,-1.256922797
C,0,0.8361146299,2.560564049,0.6885988437
C,0,1.5184323699,3.5473832119,1.3820356359
C,0,0.8324660882,2.5584045355,-0.7319640567
C,0,2.1993564279,4.5418776729,0.6678588409
H,0,1.5353668806,3.5400723098,2.466969988
C,0,1.5060541692,3.547770305,-1.4317792381
C,0,2.1932657,4.5422235245,-0.7232015945
H,0,2.7365662491,5.3159689973,1.2064268358
H,0,1.5081463584,3.5452875835,-2.5173599125
H,0,2.7240306645,5.3178436564,-1.266127432
C,0,-2.1651038417,-2.1814183974,1.4046674356
H,0,-2.1709877017,-2.1878073244,2.4898371769
C,0,-2.5538012891,1.5261502877,1.3802865662
H,0,-2.5549166808,1.526842738,2.4656707557
C,0,0.6621927262,0.2046520441,1.4101886751
C,0,0.7054046606,0.2041245708,-1.4582258505
H,0,1.7748337856,0.2774217217,-1.6464393755
F,0,1.99548276,0.2614019636,1.708423782
Bq,0,0.338898033,0.155120766,-0.024866854
Bq,0,-0.656399791,0.058657022,-0.033641089
Bq,0,1.334195857,0.251584511,-0.016092618
```

Ar = benzene-1,2-diyl, R<sup>1</sup> = F, R<sup>2</sup> = H, delocalised structure

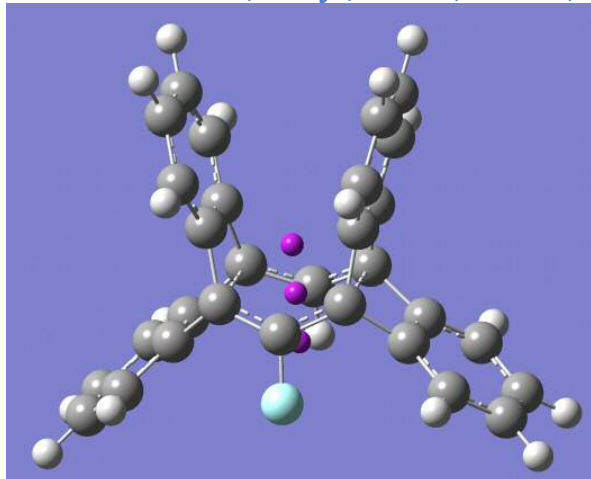

**RB3LYP/6-311+G(d) level:**  
**C<sup>∞</sup>C bond length:** 2.28654 Å  
**Electronic energy:** -1253.370720 Hartrees  
**Gibbs free energy:** -1253.053148 Hartrees  
**No imaginary frequencies**  
**Point group:** C<sub>s</sub>

**UB3LYP/6-311+G(d)//RB3LYP/6-311+G(d) level:**  
**Electronic energy (singlet):** -1253.373531 Hartrees  
**<S<sup>2</sup>> (singlet):** 0.5067  
**NICS(0):** -7.1746 ppm  
**NICS(1):** -1.2508 ppm  
**NICS(-1):** -4.5096 ppm  
**Isotropic magnetic susceptibility:** -97.1960 cgs-ppm  
**Electronic energy (triplet):** -1253.354546 Hartrees  
**<S<sup>2</sup>> (triplet):** 2.0630

**Cartesian coordinates:**

```
C,0,0.2760228632,-1.0699067694,1.2573191608
C,0,0.1782250457,1.2145223184,1.2478315394
C,0,0.178225046,1.2145223184,-1.2478315394
C,0,0.2760228634,-1.0699067694,-1.2573191608
C,0,-1.15402211,-0.680015634,-1.5218932206
C,0,-1.2153634407,0.7116626186,-1.5239653892
C,0,-2.3864595276,1.3802259603,-1.8483329325
C,0,-3.4526189451,-0.7826448286,-2.1624304786
C,0,-3.5133196373,0.6111268479,-2.1652309925
H,0,-4.339108008,-1.3572127841,-2.4115088808
H,0,-4.4465264917,1.105298382,-2.4162653688
C,0,-1.215363441,0.7116626186,1.523965389
C,0,-1.1540221103,-0.680015634,1.5218932204
C,0,-2.3864595279,1.3802259603,1.8483329321
C,0,-3.5133196376,0.6111268479,2.1652309919
C,0,-3.4526189454,-0.7826448286,2.162430478
H,0,-4.4465264921,1.105298382,2.416265368
H,0,-4.3391080085,-1.3572127841,2.4115088801
H,0,-2.4358745303,2.464701676,-1.8493293647
H,0,-2.4358745307,2.464701676,1.8493293643
C,0,1.1965811472,-0.5814725359,-2.3622902219
C,0,1.1253742106,0.8188353434,-2.3663501766
C,0,1.9933493627,-1.2575801002,-3.2716977883
C,0,1.8433021716,1.5691812313,-3.2841280045
C,0,2.7262528169,-0.5026837152,-4.1990631829
H,0,2.0692260703,-2.3400666404,-3.2540140816
C,0,2.6522481997,0.8884271186,-4.2061041679
H,0,1.7982799782,2.6540954659,-3.2812271775
H,0,3.3653224105,-1.0089849845,-4.9154422491
H,0,3.2324038869,1.4529344962,-4.9291464775
C,0,1.1965811468,-0.5814725359,2.3622902221
C,0,1.9933493622,-1.2575801002,3.2716977887
C,0,1.1253742102,0.8188353434,2.3663501768
C,0,2.7262528162,-0.5026837152,4.1990631833
H,0,2.0692260698,-2.3400666404,3.254014082
C,0,1.8433021711,1.5691812313,3.2841280048
C,0,2.652248199,0.8884271186,4.2061041684
H,0,3.3653224096,-1.0089849845,4.9154422497
H,0,1.7982799777,2.6540954659,3.2812271778
H,0,3.232403886,1.4529344962,4.9291464781
C,0,-2.2628937506,-1.4490402435,-1.8432922327
H,0,-2.2163353259,-2.5335932045,-1.8419778
C,0,-2.2628937509,-1.4490402435,1.8432922323
H,0,-2.2163353262,-2.5335932045,1.8419777996
C,0,0.7964957471,-1.3645817036,0.0000000001
C,0,0.7048380586,1.5530857812,0.0000000001
F,0,2.1500940399,-1.5854336473,0.0000000002
H,0,1.7706861717,1.7725208886,0.0000000002
Bq,0,0.401638271,0.079622529,0.
Bq,0,1.400935022,0.117119234,0.
Bq,0,-0.597658481,0.042125824,0.
```

Ar = benzene-1,2-diyl, R<sup>1</sup> = F, R<sup>2</sup> = H, localised  $\rightleftharpoons$  delocalised TS

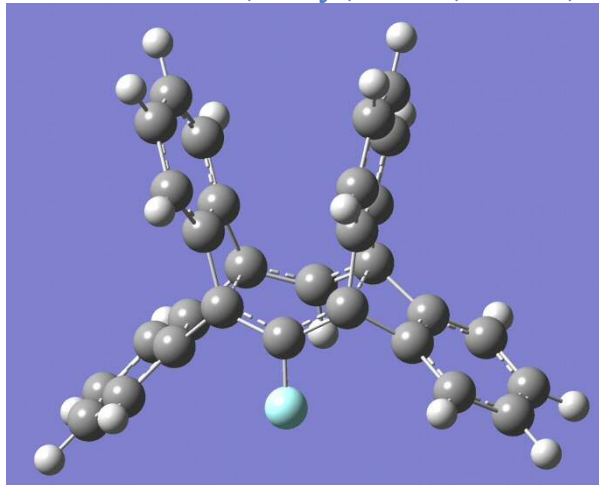

**RB3LYP/6-311+G(d) level:**  
**C<sup>∞</sup>C bond lengths:** 2.12311 Å, 2.37263 Å  
**Electronic energy:** -1253.370480 Hartrees  
**Gibbs free energy:** -1253.052563 Hartrees  
**Imaginary frequency:** 186.1i cm<sup>-1</sup>  
**Point group:** C<sub>1</sub>

**UB3LYP/6-311+G(d)//RB3LYP/6-311+G(d) level:**  
**Electronic energy (singlet):** -1253.370914 Hartrees  
**<S<sup>2</sup>> (singlet):** 0.2627  
**Electronic energy (triplet):** -1253.343737 Hartrees  
**<S<sup>2</sup>> (triplet):** 2.0519

**Cartesian coordinates:**

C,0,0.2509788673,1.3120904418,1.1944689078  
C,0,0.2562638753,1.2998849535,-1.17812125  
C,0,0.3856539554,-1.1901340564,-1.0613206709  
C,0,0.3808582647,-1.1959370748,1.0617773887  
C,0,-1.0305472869,-1.5806523791,0.6896841896  
C,0,-1.0280488482,-1.5846681848,-0.7005265236  
C,0,-2.1293833521,-2.0069187479,-1.4285878161  
C,0,-3.2594044039,-2.4145851403,0.6913449251  
C,0,-3.2562951875,-2.4199165324,-0.7050331475  
H,0,-4.147990414,-2.7405076934,1.2226423898  
H,0,-4.1428144364,-2.7496085443,-1.2375245886  
C,0,-1.1589967563,1.4675401445,-0.696237264  
C,0,-1.1599888907,1.4671375317,0.6997986281  
C,0,-2.3268017589,1.6933741343,-1.410906602  
C,0,-3.5102941892,1.9141573332,-0.6965908826  
C,0,-3.5114996258,1.9139498078,0.6979363439  
H,0,-4.4370845513,2.0886079157,-1.2339544567  
H,0,-4.4390231331,2.0883661754,1.2339327956  
H,0,-2.1319872831,-2.011270597,-2.5140428213  
H,0,-2.3265965004,1.6933500368,-2.496532242  
C,0,1.3847168187,-2.2774041363,0.6972738681  
C,0,1.3773769981,-2.2832280971,-0.699202135  
C,0,2.178821529,-3.1518940953,1.4198421654  
C,0,2.1587484551,-3.1687842932,-1.4236431022  
C,0,2.9786191442,-4.0479506214,0.6948901637  
H,0,2.2065207127,-3.1335211457,2.5045145359  
C,0,2.9686358851,-4.0571263485,-0.6997993088  
H,0,2.1654704058,-3.169178222,-2.5093642073  
H,0,3.6229970815,-4.7401210067,1.2275212435  
H,0,3.603602071,-4.7576108518,-1.232944329  
C,0,1.1235017676,2.455133336,0.7063468336  
C,0,1.8448515206,3.4064049734,1.4096582649  
C,0,1.115156155,2.4569982587,-0.7018510168  
C,0,2.5640460819,4.3716750825,0.6910468457  
H,0,1.8692144719,3.3926942089,2.4945899923  
C,0,1.8221053243,3.4140576643,-1.4130391963  
C,0,2.5527942288,4.3760844815,-0.7011443418  
H,0,3.1394675656,5.1198569384,1.2268293054  
H,0,1.8233218219,3.4109624599,-2.4988656624  
H,0,3.1176300396,5.1288385629,-1.2418789019  
C,0,-2.1352906761,-1.9968893966,1.4163357128  
H,0,-2.1413318537,-1.9951383339,2.5017401491  
C,0,-2.3287924752,1.6931579178,1.4131552459  
H,0,-2.3283818435,1.6943665386,2.4987238897  
C,0,0.820848901,0.0923380237,1.4590354051  
C,0,0.8605491573,0.0931005246,-1.4474940377  
H,0,1.9340891527,0.1366303712,-1.6203441707  
F,0,2.1624792442,0.1301614519,1.7386603357

Ar = benzene-1,2-diyl, R<sup>1</sup> = Me, R<sup>2</sup> = H, localised structure

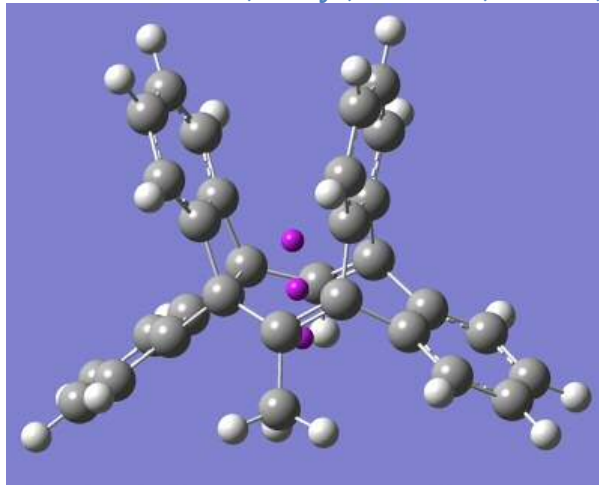

**RB3LYP/6-311+G(d) level:**  
**Allyl-allyl C–C bond length:** 1.76641 Å  
**Distance between terminal allyl C atoms:** 2.45333 Å  
**Sum of bond angles for terminal methylallyl C:** 351.437°  
**Sum of bond angles for terminal non-substituted allyl C:** 350.921°  
**Electronic energy:** -1193.421983 Hartrees  
**Gibbs free energy:** -1193.067420 Hartrees  
**No imaginary frequencies**  
**Point group:** C<sub>1</sub>

**UB3LYP/6-311+G(d)//RB3LYP/6-311+G(d) level:**  
**Electronic energy (singlet):** -1193.421983 Hartrees  
**<S<sup>2</sup>> (singlet):** 0.0000  
**NICS(0):** -2.2012 ppm  
**NICS(1):** 0.9353 ppm  
**NICS(-1):** -3.2145 ppm  
**Isotropic magnetic susceptibility:** -104.2974 cgs-ppm

**Cartesian coordinates:**

```
C,0,0.1864012025,1.3697484124,1.1319289718
C,0,0.0582882773,1.366670422,-1.3180526591
C,0,0.3575459465,-1.0986757731,-0.9703443824
C,0,0.4563130665,-1.0890415255,0.793276152
C,0,-0.965110752,-1.6378537668,0.6879991229
C,0,-1.0419502049,-1.6492655499,-0.7012837653
C,0,-2.1178987516,-2.2000780507,-1.3758407206
C,0,-3.0639167949,-2.7259564035,0.815899011
C,0,-3.1418497423,-2.7357275111,-0.5805664656
H,0,-3.8782538878,-3.1542197844,1.3922321798
H,0,-4.0148837642,-3.1711835017,-1.0568538708
C,0,-1.3183470819,1.3862283378,-0.7281542541
C,0,-1.2402424389,1.3706569844,0.6700401277
C,0,-2.5451814514,1.4787079119,-1.3708673664
C,0,-3.7075234624,1.5519737854,-0.5962117524
C,0,-3.6324309469,1.5358468136,0.7955194962
H,0,-4.6749030162,1.6237690629,-1.0832663344
H,0,-4.5420657648,1.5951042791,1.3848302798
H,0,-2.1857827056,-2.2184190105,-2.4589670353
H,0,-2.6022276508,1.4910057163,-2.4548863343
C,0,1.4802632155,-2.2076170487,0.5492965423
C,0,1.413320316,-2.1959442414,-0.8422558085
C,0,2.2728506427,-3.1124917477,1.2358081982
C,0,2.1463281358,-3.0725345044,-1.6241423482
C,0,3.0277200914,-4.0028446393,0.4559724037
H,0,2.3314597715,-3.1403631925,2.319469785
C,0,2.9698313777,-3.9808504983,-0.9404403557
H,0,2.1034162787,-3.0675483502,-2.7089694087
H,0,3.6739332277,-4.7244695113,0.9461175572
H,0,3.5733388498,-4.6845811403,-1.5052752732
C,0,0.870381267,2.6091255643,0.5742036552
C,0,1.485711258,3.6680849026,1.2258561186
C,0,0.8157134165,2.591714939,-0.8482975624
C,0,2.066087826,4.7004034982,0.476385028
H,0,1.5236788538,3.694394949,2.3106362742
C,0,1.390106595,3.6178771632,-1.5828021939
C,0,2.0240873566,4.6732183843,-0.91336788
H,0,2.5489879913,5.5275902228,0.9870486666
H,0,1.3492796839,3.6016827328,-2.6675967775
H,0,2.4760560131,5.4777142814,-1.4848570366
C,0,-1.9588455046,-2.1797473707,1.4851893046
H,0,-1.9071885553,-2.1826496661,2.5694062847
C,0,-2.3940999278,1.4474834395,1.4395276222
H,0,-2.3352004626,1.437511365,2.5234871681
C,0,0.9100579163,0.2353961278,1.3325852685
C,0,0.7286406285,0.21521406,-1.5484192981
H,0,1.78610499,0.3044399112,-1.7921949422
C,0,2.383658226,0.3231857972,1.6597655384
H,0,2.646926801,-0.390519403,2.4456606638
H,0,3.0084849435,0.0728622662,0.7947764948
H,0,2.6647713408,1.3173542006,2.0013017405
Bq,0,0.449541173,0.166551954,-0.096504325
Bq,0,-0.542452376,0.055165332,-0.036991134
Bq,0,1.441534722,0.277938576,-0.15601751
```

Ar = benzene-1,2-diyl, R<sup>1</sup> = Me, R<sup>2</sup> = H, delocalised structure

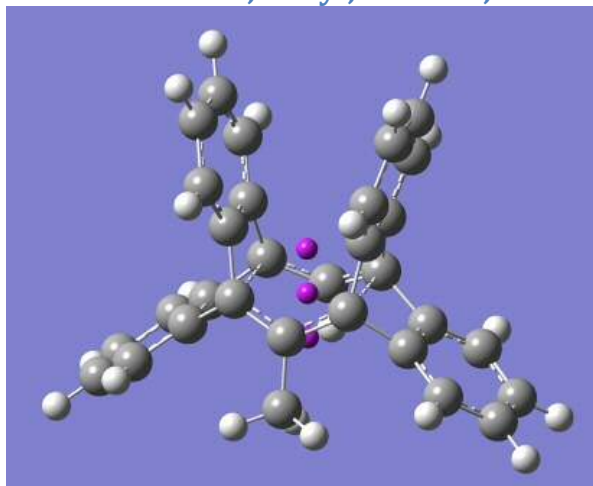

**RB3LYP/6-311+G(d) level:**  
**C<sup>∞</sup>C bond length:** 2.28525 Å  
**Electronic energy:** -1193.419008 Hartrees  
**Gibbs free energy:** -1193.066402 Hartrees  
**No imaginary frequencies**  
**Point group:** C<sub>s</sub>

**UB3LYP/6-311+G(d)//RB3LYP/6-311+G(d) level:**  
**Electronic energy (singlet):** -1193.421400 Hartrees  
**<S<sup>2</sup>> (singlet):** 0.4676  
**NICS(0):** -7.5722 ppm  
**NICS(1):** -0.7971 ppm  
**NICS(-1):** -5.5466 ppm  
**Isotropic magnetic susceptibility:** -99.7127 cgs-ppm  
**Electronic energy (triplet):** -1193.400843 Hartrees  
**<S<sup>2</sup>> (triplet):** 2.0649

**Cartesian coordinates:**

```
C,0,0.3189318159,-1.0533957193,1.2366937679
C,0,0.167662932,1.2268212477,1.2459498327
C,0,0.1676629339,1.2268212477,-1.2459498324
C,0,0.3189318178,-1.0533957193,-1.2366937675
C,0,-1.1252202157,-0.6995124592,-1.4890218785
C,0,-1.2176692445,0.6901624463,-1.5060443387
C,0,-2.4031854959,1.3293237897,-1.8365084105
C,0,-3.4215911181,-0.8586440167,-2.1302225926
C,0,-3.5135201898,0.5332668247,-2.1459883408
H,0,-4.2950497926,-1.4553142576,-2.373929557
H,0,-4.4573353013,1.0044690879,-2.4018282479
C,0,-1.2176692468,0.6901624463,1.5060443368
C,0,-1.125220218,-0.6995124592,1.4890218768
C,0,-2.4031854987,1.3293237897,1.8365084068
C,0,-3.5135201931,0.5332668247,2.1459883354
C,0,-3.4215911214,-0.8586440167,2.1302225874
H,0,-4.457335305,1.0044690879,2.4018282411
H,0,-4.2950497962,-1.4553142576,2.3739295505
H,0,-2.4757946402,2.4125669846,-1.8490106693
H,0,-2.475794643,2.4125669846,1.8490106893
C,0,1.1679814153,-0.5555405416,-2.4006312284
C,0,1.0924474468,0.8463245353,-2.3867100409
C,0,1.8940859299,-1.215451754,-3.3808136739
C,0,1.7556879314,1.6084554083,-3.3359850187
C,0,2.5703518572,-0.4481406861,-4.3410124727
H,0,1.9552122583,-2.2995344603,-3.401660304
C,0,2.5077083922,0.9431095278,-4.3156830913
H,0,1.7036149507,2.6930343342,-3.3195616824
H,0,3.1525249688,-0.9451635187,-5.1106074969
H,0,3.0432068434,1.5185473584,-5.0641979832
C,0,1.1679814116,-0.5555405416,2.4006312302
C,0,1.8940859247,-1.215451754,3.3808136768
C,0,1.0924474432,0.8463245353,2.3867100426
C,0,2.5703518506,-0.4481406861,4.3410124766
H,0,1.9552122531,-2.2995344603,3.401660307
C,0,1.7556879263,1.6084554083,3.3359850214
C,0,2.5077083856,0.9431095278,4.3156830951
H,0,3.152524961,-0.9451635187,5.1106075017
H,0,1.7036149456,2.6930343342,3.319561685
H,0,3.0432068357,1.5185473584,5.0641979878
C,0,-2.2172496973,-1.4951428809,-1.8043843041
H,0,-2.1477343411,-2.5786279473,-1.7929403754
C,0,-2.2172497001,-1.4951428809,1.8043843007
H,0,-2.1477343438,-2.5786279473,1.7929403721
C,0,0.9173465661,-1.3540525594,0.0000000007
C,0,0.6927333331,1.5721700441,0.0000000005
C,0,2.4175195679,-1.6048329097,0.0000000018
H,0,2.728059214,-2.1652567859,-0.8805563805
H,0,2.9794671254,-0.6635201882,0.0000000023
H,0,2.7280592126,-2.1652567859,0.8805563846
H,0,1.7530759598,1.8195598424,0.0000000013
Bq,0,0.4305449,0.094161424,0.
Bq,0,-0.566837627,0.021855855,0.
Bq,0,1.427927427,0.166466992,0.
```

Ar = benzene-1,2-diyl, R<sup>1</sup> = Me, R<sup>2</sup> = H, localised  $\rightleftharpoons$  delocalised TS

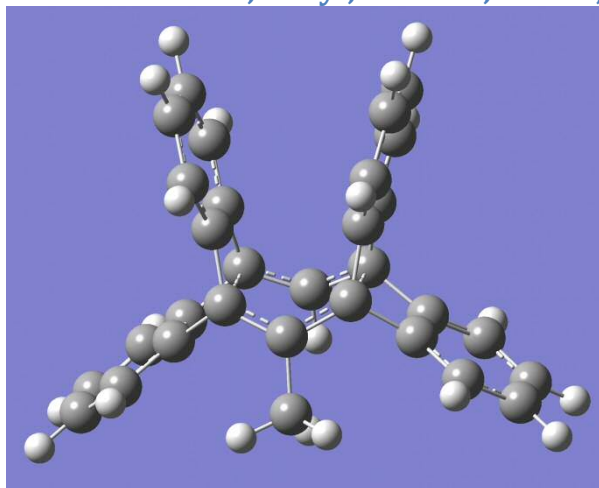

**RB3LYP/6-311+G(d) level:**  
**C<sup>∞</sup>C bond lengths:** 2.16173 Å, 2.36012 Å  
**Electronic energy:** -1193.419017 Hartrees  
**Gibbs free energy:** -1193.065765 Hartrees  
**Imaginary frequency:** 139.1i cm<sup>-1</sup>  
**Point group:** C<sub>1</sub>

**UB3LYP/6-311+G(d)//RB3LYP/6-311+G(d) level:**  
**Electronic energy (singlet):** -1193.419442 Hartrees  
**<S<sup>2</sup>> (singlet):** 0.2190  
**Electronic energy (triplet):** -1193.390507 Hartrees  
**<S<sup>2</sup>> (triplet):** 2.0611

**Cartesian coordinates:**

```
C,0,0.3070482778,-0.9902003991,1.2049982044
C,0,0.1895577007,1.1683297498,1.2057664769
C,0,0.1970658987,1.2640055202,-1.2838847526
C,0,0.3286851939,-1.0923826597,-1.2672077665
C,0,-1.1028783823,-0.6854987726,-1.4981966419
C,0,-1.1816961877,0.7073072242,-1.5206861777
C,0,-2.3700305915,1.3527734017,-1.8300190843
C,0,-3.4179812434,-0.8222760684,-2.0928186359
C,0,-3.4957243981,0.5699238767,-2.1137758861
H,0,-4.3011548773,-1.4123272247,-2.3167756509
H,0,-4.4384776533,1.051390473,-2.353979517
C,0,-1.2203782422,0.7070506402,1.4947693951
C,0,-1.145364623,-0.6814773072,1.4846573772
C,0,-2.3867554724,1.3686756291,1.8461317183
C,0,-3.4978070555,0.5836186042,2.1829195184
C,0,-3.4228594387,-0.8103183417,2.1738819423
H,0,-4.4316442797,1.0653484488,2.4553298707
H,0,-4.2996048044,-1.3927329551,2.4394082126
H,0,-2.4301165593,2.4367434961,-1.8471435092
H,0,-2.4484396557,2.4525492612,1.8539112884
C,0,1.1782515467,-0.5723615593,-2.420770711
C,0,1.1175967702,0.8354193058,-2.4107817073
C,0,1.9051598427,-1.2359178507,-3.3984107343
C,0,1.7975397336,1.582521794,-3.3605490203
C,0,2.596487846,-0.4811075063,-4.3570743008
H,0,1.9520988292,-2.3207849087,-3.416969553
C,0,2.5490922447,0.9100423793,-4.3349671847
H,0,1.7546794249,2.6675367388,-3.3473745247
H,0,3.1754847484,-0.9879353663,-5.1226648962
H,0,3.0931660662,1.4797096725,-5.0817085464
C,0,1.1646091832,-0.557054922,2.3894425929
C,0,1.8698696767,-1.230191097,3.3749978319
C,0,1.1057440089,0.8408106985,2.3705240949
C,0,2.5440882689,-0.4636602847,4.3379949038
H,0,1.9206112443,-2.3145806158,3.4002249431
C,0,1.7649558537,1.605017901,3.32029914
C,0,2.4978163333,0.9293310574,4.3081268344
H,0,3.1148395372,-0.9625673891,5.1149200183
H,0,1.7285175078,2.6901270124,3.3010160222
H,0,3.0344877121,1.4982557456,5.0607972547
C,0,-2.2131933146,-1.4666027345,-1.7875520796
H,0,-2.1531274492,-2.5506375269,-1.7727280551
C,0,-2.2347864018,-1.4678526451,1.8276972948
H,0,-2.1809833948,-2.5521825447,1.8218039647
C,0,0.9128539685,-1.3563665668,-0.0353930772
C,0,0.7210136054,1.5661529311,-0.0439113076
C,0,2.406889595,-1.6310337174,0.0049154956
H,0,2.7603330542,-2.0690867084,-0.9261661796
H,0,2.9786091939,-0.7113143519,0.1742438245
H,0,2.6600991267,-2.3153945691,0.8156237746
H,0,1.7835177813,1.8037196218,-0.0287850948
```

Ar = benzene-1,2-diyl, R<sup>1</sup> = NO<sub>2</sub>, R<sup>2</sup> = H, localised structure

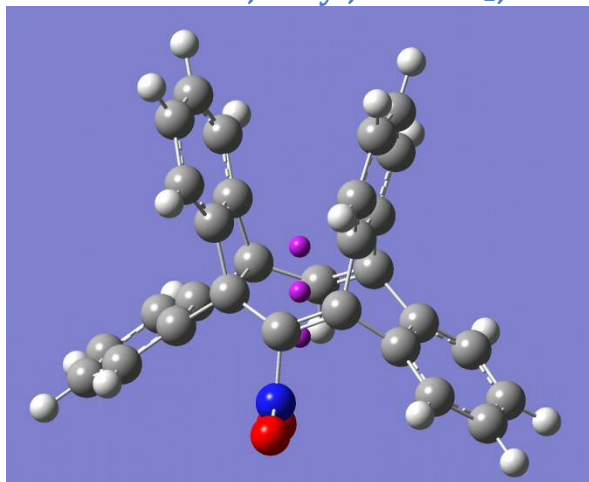

**RB3LYP/6-311+G(d) level:**  
**Allyl-allyl C–C bond length:** 1.76478 Å  
**Distance between terminal allyl C atoms:** 2.43775 Å  
**Sum of bond angles for terminal nitroallyl C:** 351.963°  
**Sum of bond angles for terminal non-substituted allyl C:** 351.172°  
**Electronic energy:** -1358.657686 Hartrees  
**Gibbs free energy:** -1358.331719 Hartrees  
**No imaginary frequencies**  
**Point group:** C<sub>1</sub>

**UB3LYP/6-311+G(d)//RB3LYP/6-311+G(d) level:**  
**Electronic energy (singlet):** -1358.657686 Hartrees  
**<S<sup>2</sup>> (singlet):** 0.0000  
**NICS(0):** -2.0146 ppm  
**NICS(1):** 0.6141 ppm  
**NICS(-1):** -2.4320 ppm  
**Isotropic magnetic susceptibility:** -106.8726 cgs-ppm

**Cartesian coordinates:**

```
C,0,0.1708303489,1.3837607066,1.2444895347
C,0,0.129960818,1.3730304869,-1.1928963554
C,0,0.3789722511,-1.1046204736,-0.8620735718
C,0,0.4405534163,-1.1073364494,0.9016303394
C,0,-0.9866202382,-1.6317063764,0.7657409393
C,0,-1.0352214181,-1.6317477638,-0.6243241119
C,0,-2.1072480979,-2.1622560802,-1.3209639176
C,0,-3.1037493382,-2.6808243227,0.8514550325
C,0,-3.1543295719,-2.6832735398,-0.5464854591
H,0,-3.935442917,-3.0986260943,1.4099900386
H,0,-4.0247958093,-3.1029396676,-1.0410074551
C,0,-1.2668314916,1.424730769,-0.6513815989
C,0,-1.2412325087,1.4160431162,0.7473121385
C,0,-2.4713121473,1.5367525948,-1.3321739097
C,0,-3.6548531578,1.6374960361,-0.593456066
C,0,-3.6260320639,1.6270642133,0.80026262
H,0,-4.6048135156,1.7253702211,-1.1107855658
H,0,-4.5527062379,1.707174942,1.359235792
H,0,-2.1549203962,-2.176829954,-2.4050273555
H,0,-2.494524771,1.5428347009,-2.4172394946
C,0,1.472596695,-2.2159434499,0.683165851
C,0,1.4197174682,-2.2155868345,-0.7082582754
C,0,2.2583212981,-3.1041169004,1.3948768099
C,0,2.1569018525,-3.1041518046,-1.4699522088
C,0,3.0198545437,-4.0042892988,0.6332255174
H,0,2.3126982879,-3.1063724143,2.4787087583
C,0,2.9714221528,-4.0035619414,-0.7633845658
H,0,2.1300366999,-3.1113468648,-2.5550611222
H,0,3.6656171862,-4.7150532897,1.1388907216
H,0,3.5804930172,-4.714701545,-1.3124986028
C,0,0.9313851667,2.5900700463,0.7243835853
C,0,1.5944925897,3.5939733508,1.4106567502
C,0,0.9088232375,2.5765629074,-0.6969503661
C,0,2.2478390908,4.5974387252,0.6826325923
H,0,1.6223367298,3.5929656148,2.49502367
C,0,1.5574275484,3.5748702736,-1.405796826
C,0,2.230913038,4.5864867994,-0.7076230895
H,0,2.773694792,5.385503374,1.2114323969
H,0,1.5516643784,3.5662145441,-2.4911765835
H,0,2.7433494752,5.3677313556,-1.2597241582
C,0,-2.0027980289,-2.157059485,1.5445938111
H,0,-1.9686908532,-2.166652871,2.629147752
C,0,-2.4122454741,1.5163865457,1.4858304843
H,0,-2.3868633445,1.508734222,2.5707027004
C,0,0.808093202,0.2141508837,1.4755318468
C,0,0.7876320504,0.2103569714,-1.4110359684
H,0,1.8538007823,0.2825341732,-1.6098843486
N,0,2.2587870839,0.3445946014,1.8225601158
O,0,3.0812041387,0.190421784,0.9340243665
O,0,2.5173151319,0.5930231816,2.9914533715
Bq,0,0.452673681,0.161557021,0.025940971
Bq,0,-0.542036792,0.060246497,0.042889487
Bq,0,1.447384154,0.262867545,0.008992454
```



Ar = benzene-1,2-diyl, R<sup>1</sup> = NO<sub>2</sub>, R<sup>2</sup> = H, delocalised structure

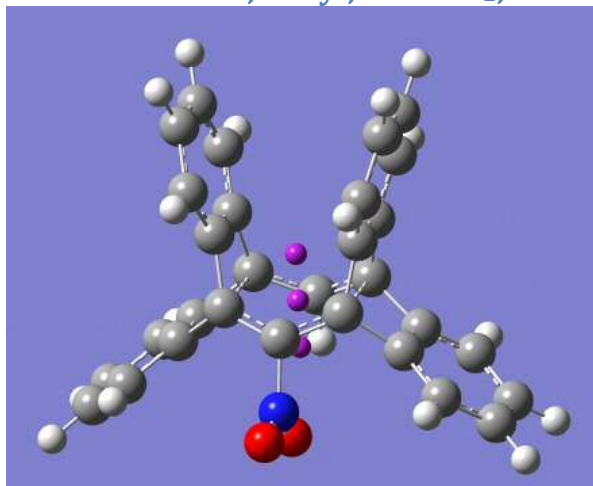

**RB3LYP/6-311+G(d) level:**  
**C<sup>∞</sup>C bond length:** 2.27597 Å  
**Electronic energy:** -1358.655707 Hartrees  
**Gibbs free energy:** -1358.330828 Hartrees  
**No imaginary frequencies**  
**Point group:** C<sub>s</sub>

**UB3LYP/6-311+G(d)//RB3LYP/6-311+G(d) level:**  
**Electronic energy (singlet):** -1358.657432 Hartrees  
**<S<sup>2</sup>> (singlet):** 0.4310  
**NICS(0):** -6.8963 ppm  
**NICS(1):** -1.1613 ppm  
**NICS(-1):** -3.2201 ppm  
**Isotropic magnetic susceptibility:** -162.9477 cgs-ppm  
**Electronic energy (triplet):** -1358.636064 Hartrees  
**<S<sup>2</sup>> (triplet):** 2.0640

**Cartesian coordinates:**

C,0,0.2621906333,-0.7810264338,1.2528984118  
C,0,-0.1751271894,1.4429685328,1.0463532815  
C,0,-0.2400143657,1.2172109069,-1.4321843478  
C,0,0.1965026369,-1.0095680038,-1.2562112838  
C,0,-1.2862644685,-0.863708487,-1.4874862059  
C,0,-1.5536405277,0.4976568343,-1.6028718106  
C,0,-2.820262741,0.9561254461,-1.9323064623  
C,0,-3.5589053938,-1.3596968792,-2.019682549  
C,0,-3.8271933891,0.0043143874,-2.1372862453  
H,0,-4.3559941254,-2.0778602237,-2.1831038115  
H,0,-4.8303440095,0.331709131,-2.3911169445  
C,0,-1.4747097686,0.7722732115,1.4120837914  
C,0,-1.2072498612,-0.5888007817,1.5306673508  
C,0,-2.7246827349,1.288667372,1.7186082066  
C,0,-3.7151089775,0.3942766274,2.1440390031  
C,0,-3.4468407855,-0.9698045202,2.2608748181  
H,0,-4.7052719818,0.7668572083,2.3862980577  
H,0,-4.2309712563,-1.6428849748,2.5924131318  
H,0,-3.0319135112,2.0170110103,-2.0220660743  
H,0,-2.9364027709,2.3493128687,1.6262135061  
C,0,0.9800382892,-0.5061253126,-2.4577869195  
C,0,0.709242009,0.8663641122,-2.5639558119  
C,0,1.8047788801,-1.1469362229,-3.3671864711  
C,0,1.2642655545,1.6255471265,-3.5802892175  
C,0,2.3731721675,-0.3794645906,-4.3949918967  
H,0,2.0277048721,-2.2052795228,-3.27734759  
C,0,2.1085342934,0.983598794,-4.4991228709  
H,0,1.0683635531,2.6906106241,-3.6582201927  
H,0,3.0334845213,-0.8540742754,-5.1134689186  
H,0,2.5647933066,1.5586097778,-5.298482101  
C,0,1.1046362,-0.0726253182,2.3015259945  
C,0,1.9784773584,-0.5426071665,3.2676325639  
C,0,0.8332296093,1.2977420161,2.1720591148  
C,0,2.5958072723,0.3951237008,4.1090790623  
H,0,2.2014409293,-1.6008198825,3.3589050423  
C,0,1.4366520108,2.2253125419,3.0044279392  
C,0,2.3304897232,1.7558229072,3.978992607  
H,0,3.2947503456,0.0549165594,4.8661878177  
H,0,1.2400259586,3.2878572648,2.8988438245  
H,0,2.824892554,2.4635430194,4.6366271405  
C,0,-2.2746133396,-1.8140959932,-1.6944480847  
H,0,-2.0657610046,-2.8752779609,-1.6027097802  
C,0,-2.179023346,-1.4815213358,1.9568239069  
H,0,-1.9701991614,-2.542802351,2.0474740378  
C,0,0.780450103,-1.1231697072,0.0046715098  
C,0,0.2659161454,1.7472553188,-0.2433086565  
N,0,2.2858270742,-1.2136627207,-0.026496032  
O,0,2.7552259056,-2.3380006723,0.0636231257  
O,0,2.9293762911,-0.1844165963,-0.1370899411  
H,0,1.2872233518,2.1136832132,-0.3034221758  
Bq,0,0.181652994,0.248945102,-0.104630181  
Bq,0,-0.800802339,0.067299459,-0.062364611  
Bq,0,1.164108327,0.430590746,-0.146895751

Ar = benzene-1,2-diyl, R<sup>1</sup> = NO<sub>2</sub>, R<sup>2</sup> = H, localised ⇌ delocalised TS

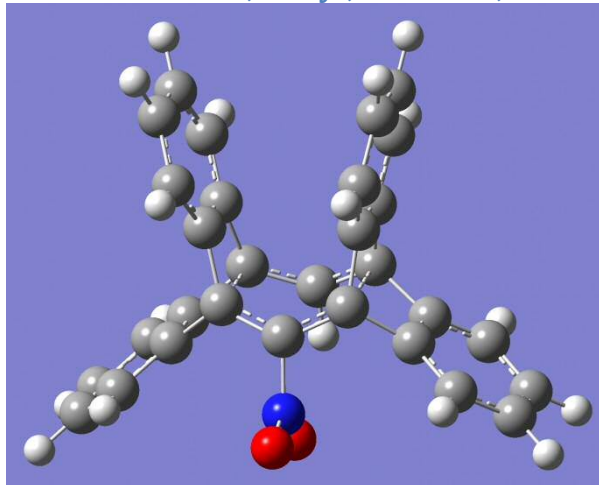

**RB3LYP/6-311+G(d) level:**  
**C<sup>∞</sup>C bond lengths:** 2.11780 Å, 2.35767 Å  
**Electronic energy:** -1358.655406 Hartrees  
**Gibbs free energy:** -1358.330239 Hartrees  
**Imaginary frequency:** 179.4i cm<sup>-1</sup>  
**Point group:** C<sub>1</sub>

**UB3LYP/6-311+G(d)//RB3LYP/6-311+G(d) level:**  
**Electronic energy (singlet):** -1358.655410 Hartrees  
**<S<sup>2</sup>> (singlet):** 0.0233  
**Electronic energy (triplet):** -1358.620011 Hartrees  
**<S<sup>2</sup>> (triplet):** 2.0580

**Cartesian coordinates:**

```
C,0,0.2311355236,1.32114625,1.2811835982
C,0,0.1692115716,1.4394693163,-1.0726980174
C,0,0.3397449779,-1.047253564,-1.0995088981
C,0,0.4030318132,-1.1763487433,1.0134022165
C,0,-1.0187530516,-1.5543555542,0.6664872952
C,0,-1.0595306054,-1.4770190204,-0.7205936225
C,0,-2.178138083,-1.8726710695,-1.4368523822
C,0,-3.2334767075,-2.4200491709,0.6908201897
C,0,-3.2750503354,-2.3440838534,-0.7028984907
H,0,-4.0997005492,-2.7904730739,1.2296514085
H,0,-4.1733730825,-2.656855666,-1.2256339899
C,0,-1.2372453876,1.5521594156,-0.5502573166
C,0,-1.1999599415,1.4725160809,0.841691899
C,0,-2.4281338673,1.7970795352,-1.2184233187
C,0,-3.5935299704,1.9553077752,-0.4589326361
C,0,-3.5548917842,1.8738774246,0.9327184896
H,0,-4.5381604747,2.1441776419,-0.958860202
H,0,-4.4693821749,1.9998363941,1.5033248629
H,0,-2.2158838649,-1.8152896246,-2.5200643981
H,0,-2.4594588354,1.8592921564,-2.3017086128
C,0,1.3870718859,-2.2437677324,0.5604168704
C,0,1.3436175234,-2.1570175265,-0.8335211322
C,0,2.1786263098,-3.177728579,1.2063836132
C,0,2.0969653089,-3.0005183246,-1.6317132476
C,0,2.9511726204,-4.0315940373,0.4040806075
H,0,2.2265459613,-3.237457214,2.2889334961
C,0,2.911936646,-3.9441261754,-0.9866767316
H,0,2.0787367498,-2.9303798121,-2.7149253793
H,0,3.595877357,-4.7669071612,0.8744479578
H,0,3.5265424924,-4.6133863276,-1.5801556265
C,0,1.0475455022,2.5278236274,0.8477173156
C,0,1.7376865724,3.4735006211,1.5879044327
C,0,1.0089461385,2.5956821656,-0.5591372103
C,0,2.4073293626,4.4981000378,0.9033929863
H,0,1.7788234666,3.4128008556,2.6706440177
C,0,1.6671261547,3.6108848155,-1.2332453681
C,0,2.373910316,4.564748316,-0.4861549952
H,0,2.9616148936,5.2429536921,1.464975485
H,0,1.6500277367,3.6603585341,-2.3176763779
H,0,2.902392673,5.3619378333,-0.9989844162
C,0,-2.0923810726,-2.0280707123,1.4036078432
H,0,-2.0619222632,-2.0895160564,2.4867332818
C,0,-2.3492496086,1.6328559416,1.601902878
H,0,-2.317796866,1.569117611,2.6849886811
C,0,0.8211444446,0.0965859001,1.4834884458
C,0,0.787598967,0.2613609943,-1.4288511813
H,0,1.8545367266,0.3325238961,-1.6231031822
N,0,2.2877934468,0.1596845974,1.8225975285
O,0,3.0949341584,0.2089486696,0.9103763782
O,0,2.5621737846,0.1496329099,3.0131909046
```

Ar = benzene-1,2-diyl, R<sup>1</sup> = Cl, R<sup>2</sup> = H, localised structure

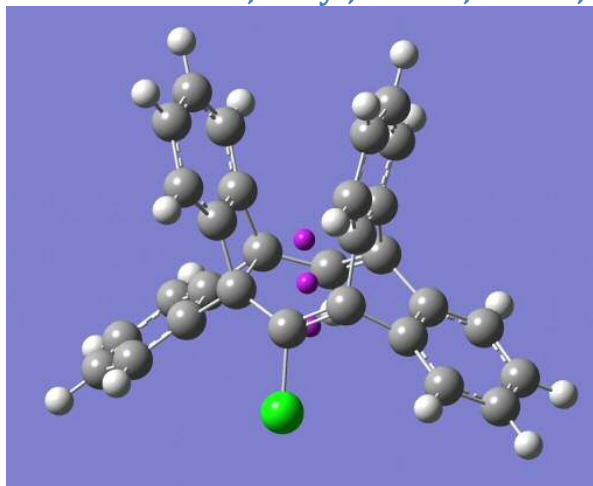

**RB3LYP/6-311+G(d) level:**  
**Allyl-allyl C–C bond length:** 1.76080 Å  
**Distance between terminal allyl C atoms:** 2.44569 Å  
**Sum of bond angles for terminal chloroallyl C:** 351.852°  
**Sum of bond angles for terminal non-substituted allyl C:** 350.900°  
**Electronic energy:** -1613.722788 Hartrees  
**Gibbs free energy:** -1613.405981 Hartrees  
**No imaginary frequencies**  
**Point group:** C<sub>1</sub>

**UB3LYP/6-311+G(d)//RB3LYP/6-311+G(d) level:**  
**Electronic energy (singlet):** -1613.722788 Hartrees  
**<S<sup>2</sup>> (singlet):** 0.0000  
**NICS(0):** -1.8603 ppm  
**NICS(1):** 0.9468 ppm  
**NICS(-1):** -2.8443 ppm  
**Isotropic magnetic susceptibility:** -126.6451 cgs-ppm

**Cartesian coordinates:**

```
C,0,1.3480175124,0.1139029963,0.978918299
C,0,1.2829589297,0.4453404644,-1.4433348526
C,0,-1.1655444093,0.0232023373,-1.08755132
C,0,-1.1282700568,-0.2315482831,0.6543275291
C,0,-1.7303135614,1.1727218639,0.686005221
C,0,-1.7636346774,1.3722978252,-0.6905833262
C,0,-2.3681136079,2.4806213946,-1.2579739879
C,0,-2.8969954586,3.2036263693,1.0173367797
C,0,-2.9312599804,3.4057139122,-0.3663105169
H,0,-3.3492040667,3.9441921382,1.6696554304
H,0,-3.409161386,4.2989930007,-0.7564321535
C,0,1.2639778335,1.7687436474,-0.7417524961
C,0,1.2801041237,1.5747474903,0.64433103
C,0,1.2982186376,3.0488388961,-1.2770820665
C,0,1.3434502226,4.1419995921,-0.4055308413
C,0,1.3566645204,3.9484817957,0.9748473045
H,0,1.3697067216,5.1495615662,-0.8081554924
H,0,1.3933600919,4.8060846975,1.638967716
H,0,-2.4076996171,2.6443696768,-2.3300988891
H,0,1.2866051651,3.1991666742,-2.3520012085
C,0,-2.1950390961,-1.2837342854,0.3383413122
C,0,-2.2202293124,-1.0829339355,-1.0386907606
C,0,-3.0462733177,-2.1750335266,0.9683729033
C,0,-3.092339572,-1.7681367711,-1.8676380351
C,0,-3.9295303344,-2.88274377,0.139693481
H,0,-3.0289124008,-2.3465537847,2.0393895754
C,0,-3.9508760534,-2.6867552082,-1.2448302578
H,0,-3.1178079149,-1.6217068263,-2.9429812568
H,0,-4.6102114957,-3.604260139,0.5806633161
H,0,-4.6480590406,-3.2596035393,-1.8483075588
C,0,2.5889467967,-0.4877666024,0.3475113338
C,0,3.6637230124,-1.1386379775,0.9315710319
C,0,2.5437165628,-0.3036822678,-1.0612133254
C,0,4.6986640093,-1.6185433323,0.1187372168
H,0,3.6937956519,-1.2902238125,2.0053629281
C,0,3.5720102846,-0.782937088,-1.8581104514
C,0,4.6518133259,-1.4463418308,-1.2607765895
H,0,5.5412895948,-2.1313106276,0.5713563883
H,0,3.5366110169,-0.6486171895,-2.9347362982
H,0,5.458550406,-1.8242999945,-1.8806977699
C,0,-2.2976954361,2.0661169599,1.5778641658
H,0,-2.2833067098,1.9146000409,2.6523765252
C,0,1.3267789234,2.6576811335,1.5121347519
H,0,1.3402759625,2.5051499188,2.5866141672
C,0,0.222905781,-0.6173799029,1.1573463684
C,0,0.1536550672,-0.2497838802,-1.7073607353
H,0,0.2776778165,-1.2811743496,-2.0316853003
Cl,0,0.4217523954,-2.3633875668,1.4216599345
Bq,0,0.118953804,-0.086044378,-0.241275785
Bq,0,-0.030007442,0.893236002,-0.104088011
Bq,0,0.26791505,-1.065324758,-0.37846356
```

Ar = benzene-1,2-diyl, R<sup>1</sup> = Cl, R<sup>2</sup> = H, delocalised structure

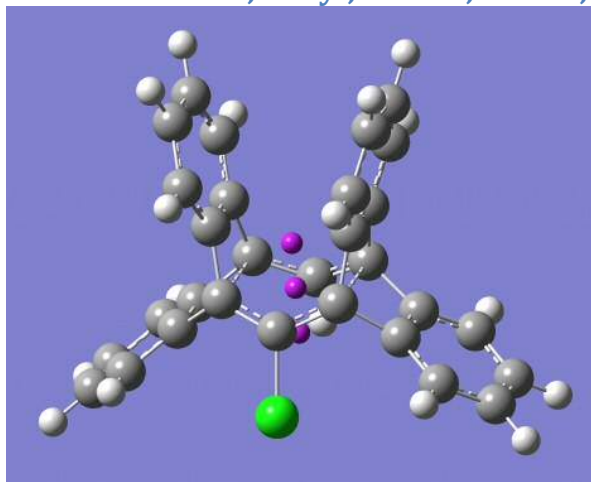

**RB3LYP/6-311+G(d) level:**  
**C<sup>∞</sup>C bond length:** 2.27676 Å  
**Electronic energy:** -1613.719739 Hartrees  
**Gibbs free energy:** -1613.404768 Hartrees  
**No imaginary frequencies**  
**Point group:** C<sub>2v</sub>

**UB3LYP/6-311+G(d)//RB3LYP/6-311+G(d) level:**  
**Electronic energy (singlet):** -1613.721798 Hartrees  
**<S<sup>2</sup>> (singlet):** 0.4450  
**NICS(0):** -7.0901 ppm  
**NICS(1):** -0.9187 ppm  
**NICS(-1):** -4.7464 ppm  
**Isotropic magnetic susceptibility:** -98.9107 cgs-ppm  
**Electronic energy (triplet):** -1613.700472 Hartrees  
**<S<sup>2</sup>> (triplet):** 2.0656

**Cartesian coordinates:**

```
C,0,-1.2520176465,1.1413725106,0.0213602694
C,0,-1.2454521515,-1.1353817889,0.0226090504
C,0,1.2454521515,-1.1353817889,0.0226090504
C,0,1.2520176465,1.1413725106,0.0213602694
C,0,1.4978029916,0.6927206146,1.4415192864
C,0,1.507922801,-0.6996550532,1.4418728914
C,0,1.8344984434,-1.4166619194,2.5828018363
C,0,2.1328804381,0.6997726236,3.7429696299
C,0,2.1450056023,-0.6952342282,3.7427208228
H,0,2.377154131,1.2368033179,4.6539925546
H,0,2.398727174,-1.2279523701,4.6537200771
C,0,-1.507922801,-0.6996550532,1.4418728914
C,0,-1.4978029916,0.6927206146,1.4415192864
C,0,-1.8344984434,-1.4166619194,2.5828018363
C,0,-2.1450056023,-0.6952342282,3.7427208228
C,0,-2.1328804381,0.6997726236,3.7429696299
H,0,-2.398727174,-1.2279523701,4.6537200771
H,0,-2.377154131,1.2368033179,4.6539925546
H,0,1.8432243978,-2.5022264092,2.5847795789
H,0,-1.8432243978,-2.5022264092,2.5847795789
C,0,2.4002954143,0.6996575904,-0.8718794559
C,0,2.3895331485,-0.70261285,-0.8756746272
C,0,3.3657783429,1.4068271457,-1.5702609567
C,0,3.3378390998,-1.4237124423,-1.5838427464
C,0,4.3250338288,0.6815482091,-2.2911482144
H,0,3.3665353387,2.4918012422,-1.5843232711
C,0,4.3100962665,-0.7116414137,-2.3012759246
H,0,3.3240251491,-2.5093927283,-1.5958120637
H,0,5.0845436645,1.2133391845,-2.8553500543
H,0,5.0583667195,-1.2522545916,-2.8721022998
C,0,-2.4002954143,0.6996575904,-0.8718794559
C,0,-3.3657783429,1.4068271457,-1.5702609567
C,0,-2.3895331485,-0.70261285,-0.8756746272
C,0,-4.3250338288,0.6815482091,-2.2911482144
H,0,-3.3665353387,2.4918012422,-1.5843232711
C,0,-3.3378390998,-1.4237124423,-1.5838427464
C,0,-4.3100962665,-0.7116414137,-2.3012759246
H,0,-5.0845436645,1.2133391845,-2.8553500543
H,0,-3.3240251491,-2.5093927283,-1.5958120637
H,0,-5.0583667195,-1.2522545916,-2.8721022998
C,0,1.8111190488,1.4157086851,2.5829642918
H,0,1.8032973841,2.5012325099,2.583594168
C,0,-1.8111190488,1.4157086851,2.5829642918
H,0,-1.8032973841,2.5012325099,2.583594168
C,0,0.,1.4878510051,-0.4976759135
C,0,0.,-1.4429919592,-0.5270134183
Cl,0,0.,1.959462892,-2.2195753124
H,0,0.,-1.6076410804,-1.6025153228
Bq,0,0.,0.009473415,-0.156125115
Bq,0,0.,0.006582354,0.843870706
Bq,0,0.,0.012364476,-1.156120936
```

Ar = benzene-1,2-diyl, R<sup>1</sup> = Cl, R<sup>2</sup> = H, localised ⇌ delocalised TS

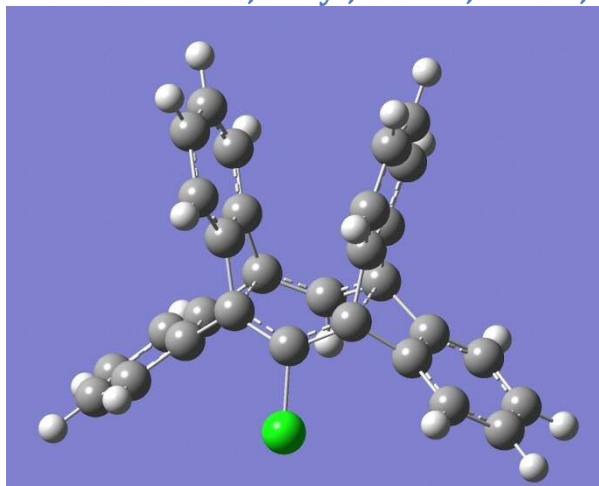

**RB3LYP/6-311+G(d) level:**  
**C<sup>∞</sup>C bond lengths:** 2.16127 Å, 2.34645 Å  
**Electronic energy:** -1613.719687 Hartrees  
**Gibbs free energy:** -1613.404060 Hartrees  
**Imaginary frequency:** 145.6i cm<sup>-1</sup>  
**Point group:** C<sub>1</sub>

**UB3LYP/6-311+G(d)//RB3LYP/6-311+G(d) level:**  
**Electronic energy (singlet):** -1613.720102 Hartrees  
**<S<sup>2</sup>> (singlet):** 0.2164  
**Electronic energy (triplet):** -1613.690991 Hartrees  
**<S<sup>2</sup>> (triplet):** 2.0621

**Cartesian coordinates:**

```
C,0,0.2800374802,-1.002935718,1.2848119106
C,0,0.0200400792,1.3290613689,1.2786976494
C,0,0.0186098999,1.2330893808,-1.2108482724
C,0,0.2603008963,-0.9146144246,-1.2171121247
C,0,-1.2093268085,-0.6865927423,-1.4907934172
C,0,-1.3636666605,0.695254349,-1.4987278308
C,0,-2.5667389072,1.2881340432,-1.848171399
C,0,-3.4757804321,-0.9479399825,-2.173127682
C,0,-3.6305329774,0.4393923249,-2.1828043231
H,0,-4.3177084532,-1.5799485627,-2.4373530417
H,0,-4.5908445673,0.8662298906,-2.4544074969
C,0,-1.3293074259,0.7074810126,1.5210408943
C,0,-1.1748885681,-0.6783732223,1.5088052735
C,0,-2.5512041597,1.288460347,1.8261909501
C,0,-3.6312325864,0.4450483087,2.1141747853
C,0,-3.4772002632,-0.9409372169,2.100309758
H,0,-4.5992740172,0.8746064005,2.3518021639
H,0,-4.3266436754,-1.5773505515,2.3270589573
H,0,-2.6912950963,2.36644357,-1.856310414
H,0,-2.6718524092,2.3673121825,1.8365904314
C,0,1.1037282413,-0.4317969946,-2.3871886227
C,0,0.9518861974,0.9577331518,-2.3764427785
C,0,1.8598250382,-1.0656554753,-3.3596080092
C,0,1.5580367577,1.7579345251,-3.3315700011
C,0,2.4806474745,-0.262401256,-4.3271287135
H,0,1.9954377821,-2.1421474482,-3.3620481109
C,0,2.3358276283,1.1245132389,-4.3122778321
H,0,1.4507363932,2.8383223299,-3.3193771656
H,0,3.0911429887,-0.7268979383,-5.094969898
H,0,2.8343408163,1.7219664459,-5.0689712309
C,0,1.1133535691,-0.4341775186,2.4216257334
C,0,1.8952558112,-1.0543873847,3.3830249898
C,0,0.9626227364,0.964713857,2.4108183738
C,0,2.5414818266,-0.2565242405,4.3372862537
H,0,2.0261789715,-2.1315355053,3.3837327256
C,0,1.599188759,1.7543985051,3.3555269561
C,0,2.3991165022,1.1286344076,4.3221983259
H,0,3.1650906804,-0.724520222,5.0923023476
H,0,1.4905070396,2.8346829091,3.3420147082
H,0,2.9117643018,1.7304993206,5.0658199365
C,0,-2.2512005261,-1.5360236151,-1.8294689358
H,0,-2.1331702226,-2.6150376307,-1.8243306461
C,0,-2.2387725062,-1.5203615226,1.7993877377
H,0,-2.1180552026,-2.5991562057,1.7903671141
C,0,0.8249304704,-1.2543424605,0.0391956616
C,0,0.5301985022,1.6553838792,0.0380163265
Cl,0,2.587496501,-1.5315060856,0.0088431829
H,0,1.5806661202,1.9385971755,0.0233947991
```

## Ar = benzene-1,2-diyl, R<sup>1</sup> = F, R<sup>2</sup> = F, localised structure

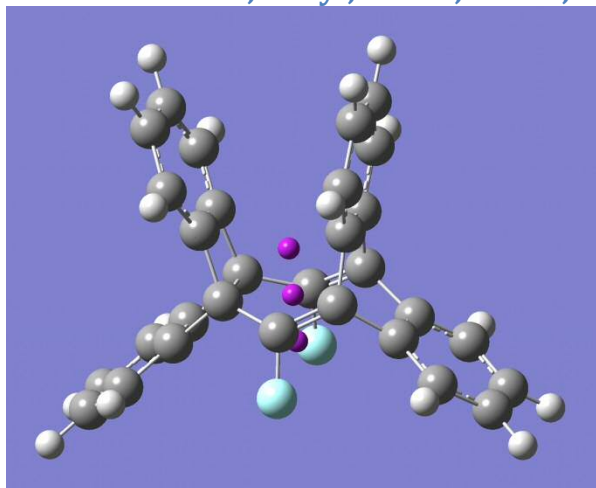

**RB3LYP/6-311+G(d) level:**  
**Allyl-allyl C–C bond length:** 1.74443 Å  
**Distance between terminal allyl C atoms:** 2.46674 Å  
**Sum of bond angles for terminal chloroallyl C:** 350.275°  
**Electronic energy:** -1352.643144 Hartrees  
**Gibbs free energy:** -1352.333029 Hartrees  
**No imaginary frequencies**  
**Point group:** *C<sub>s</sub>*

**UB3LYP/6-311+G(d)//RB3LYP/6-311+G(d) level:**  
**Electronic energy (singlet):** -1352.643144 Hartrees  
**<S<sup>2</sup>> (singlet):** 0.0000  
**NICS(0):** -1.9100 ppm  
**NICS(1):** -0.3383 ppm  
**NICS(-1):** -1.5837 ppm  
**Isotropic magnetic susceptibility:** -123.3006 cgs-ppm

### Cartesian coordinates:

```
C,0.1955407976,1.3997912798,1.233371931
C,0.1955407976,1.3997912798,-1.233371931
C,0.4408561456,-1.0944218024,-0.8722151773
C,0.4408561456,-1.0944218024,0.8722151773
C,-0.9753534636,-1.6352090127,0.6956779308
C,-0.9753534636,-1.6352090127,-0.6956779308
C,-2.0162701606,-2.1692664593,-1.434799846
C,-3.0873645643,-2.697618974,0.6995137984
C,-3.0873645643,-2.697618974,-0.6995137984
H,-3.9373020295,-3.1204817927,1.2258775986
H,-3.9373020295,-3.1204817927,-1.2258775986
C,-1.2022628328,1.4355390773,-0.7001762212
C,-1.2022628328,1.4355390773,0.7001762212
C,-2.3928464684,1.536259571,-1.4079645355
C,-3.5930447031,1.6323048283,-0.6970421629
C,-3.5930447031,1.6323048283,0.6970421629
H,-4.5319217503,1.7111172109,-1.2357248732
H,-4.5319217503,1.7111172109,1.2357248732
H,-2.024360001,-2.1799182758,-2.5197888382
H,-2.3908047705,1.5379875463,-2.4932776512
C,1.5067671386,-2.1784915955,0.6954403917
C,1.5067671386,-2.1784915955,-0.6954403917
C,2.2894032392,-3.0484967068,1.4341127875
C,2.2894032392,-3.0484967068,-1.4341127875
C,3.0935722277,-3.9317941403,0.6994243071
H,2.3069886245,-3.0470730385,2.5188450405
C,3.0935722277,-3.9317941403,-0.6994243071
H,2.3069886245,-3.0470730385,-2.5188450405
H,3.7374122602,-4.6290615353,1.2261954534
H,3.7374122602,-4.6290615353,-1.2261954534
C,0.994117118,2.5763683734,0.7101394739
C,1.6730394228,3.5639826727,1.4065766389
C,0.994117118,2.5763683734,-0.7101394739
C,2.3548231061,4.5590266703,0.6956490069
H,1.6856752144,3.5560304588,2.4914687943
C,1.6730394228,3.5639826727,-1.4065766389
C,2.3548231061,4.5590266703,-0.6956490069
H,2.8896179938,5.3331638308,1.2365241346
H,1.6856752144,3.5560304588,-2.4914687943
H,2.8896179938,5.3331638308,-1.2365241346
C,-2.0162701606,-2.1692664593,1.434799846
H,-2.024360001,-2.1799182758,2.5197888382
C,-2.3928464684,1.536259571,1.4079645355
H,-2.3908047705,1.5379875463,2.4932776512
C,0.8185777608,0.2238122207,1.4430548466
C,0.8185777608,0.2238122207,-1.4430548466
F,2.1446028959,0.2711588914,1.7619717989
F,2.1446028959,0.2711588914,-1.7619717989
Bq,0,0.484991568,0.176393899,0.
Bq,0,-0.510445327,0.080971744,0.
Bq,0,1.480428463,0.271816055,0.
```

Ar = benzene-1,2-diyl, R<sup>1</sup> = F, R<sup>2</sup> = F, delocalised structure

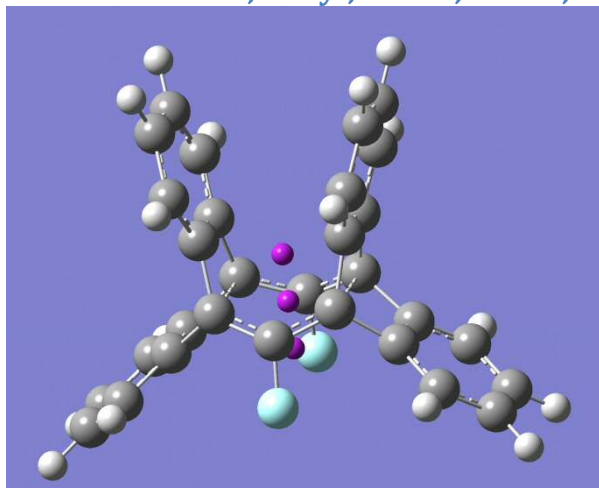

**RB3LYP/6-311+G(d) level:**  
**C<sup>∞</sup>C bond length:** 2.28786 Å  
**Electronic energy:** -1352.638730 Hartrees  
**Gibbs free energy:** -1352.330327 Hartrees  
**No imaginary frequencies**  
**Point group:** C<sub>2v</sub>

**UB3LYP/6-311+G(d)//RB3LYP/6-311+G(d) level:**  
**Electronic energy (singlet):** -1352.642270 Hartrees  
**<S<sup>2</sup>> (singlet):** 0.5382  
**NICS(0):** -7.3036 ppm  
**NICS(1):** -1.7844 ppm  
**NICS(-1):** -3.1360 ppm  
**Isotropic magnetic susceptibility:** -47.8201 cgs-ppm  
**Electronic energy (triplet):** -1352.623950 Hartrees  
**<S<sup>2</sup>> (triplet):** 2.0637

**Cartesian coordinates:**

```
C,0,-1.2541244394,1.1439324795,0.0065437077
C,0,-1.2541244394,-1.1439324795,0.0065437077
C,0,1.2541244394,-1.1439324795,0.0065437077
C,0,1.2541244394,1.1439324795,0.0065437077
C,0,1.5170806051,0.6962208957,1.4195342946
C,0,1.5170806051,-0.6962208957,1.4195342946
C,0,1.8417311196,-1.416543361,2.559384683
C,0,2.160924079,0.6975851613,3.7181672327
C,0,2.160924079,-0.6975851613,3.7181672327
H,0,2.4127713094,1.2322184263,4.6284712913
H,0,2.4127713094,-1.2322184263,4.6284712913
C,0,-1.5170806051,-0.6962208957,1.4195342946
C,0,-1.5170806051,0.6962208957,1.4195342946
C,0,-1.8417311196,-1.416543361,2.559384683
C,0,-2.160924079,-0.6975851613,3.7181672327
C,0,-2.160924079,0.6975851613,3.7181672327
H,0,-2.4127713094,-1.2322184263,4.6284712913
H,0,-2.4127713094,1.2322184263,4.6284712913
H,0,1.8429191828,-2.5020011657,2.560205023
H,0,-1.8429191828,-2.5020011657,2.560205023
C,0,2.3634384693,0.7005082871,0.930464761
C,0,2.3634384693,-0.7005082871,-0.930464761
C,0,3.2844306129,1.4156612816,-1.6785575916
C,0,3.2844306129,-1.4156612816,-1.6785575916
C,0,4.2173330043,0.6967291863,-2.4387784175
H,0,3.2712005435,2.5006271424,-1.6967351685
C,0,4.2173330043,-0.6967291863,-2.4387784175
H,0,3.2712005435,-2.5006271424,-1.6967351685
H,0,4.9426448017,1.2327771042,-3.0424597238
H,0,4.9426448017,-1.2327771042,-3.0424597238
C,0,-2.3634384693,0.7005082871,-0.930464761
C,0,-3.2844306129,1.4156612816,-1.6785575916
C,0,-2.3634384693,-0.7005082871,-0.930464761
C,0,-4.2173330043,0.6967291863,-2.4387784175
H,0,-3.2712005435,2.5006271424,-1.6967351685
C,0,-3.2844306129,-1.4156612816,-1.6785575916
C,0,-4.2173330043,-0.6967291863,-2.4387784175
H,0,-4.9426448017,1.2327771042,-3.0424597238
H,0,-3.2712005435,-2.5006271424,-1.6967351685
H,0,-4.9426448017,-1.2327771042,-3.0424597238
C,0,1.8417311196,1.416543361,2.559384683
H,0,1.8429191828,2.5020011657,2.560205023
C,0,-1.8417311196,1.416543361,2.559384683
H,0,-1.8429191828,2.5020011657,2.560205023
C,0,0.,1.470839741,-0.5028307419
C,0,0.,-1.470839741,-0.5028307419
F,0,0.,1.7735727901,-1.8374102582
F,0,0.,-1.7735727901,-1.8374102582
Bq,0,0,0.,-0.163247776
Bq,0,0,0.,0.836752225
Bq,0,0,0.,-1.163247776
```

Ar = benzene-1,2-diyl, R<sup>1</sup> = F, R<sup>2</sup> = F, localised  $\rightleftharpoons$  delocalised TS

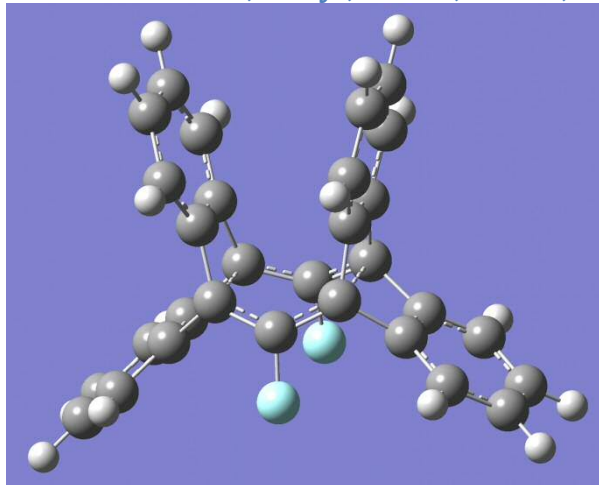

**RB3LYP/6-311+G(d) level:**  
**C<sup>∞</sup>C bond lengths:** 2.19000 Å, 2.35279 Å  
**Electronic energy:** -1352.638834 Hartrees  
**Gibbs free energy:** -1352.015941 Hartrees  
**Imaginary frequency:** 126.3i cm<sup>-1</sup>  
**Point group:** C<sub>s</sub>

**UB3LYP/6-311+G(d)//RB3LYP/6-311+G(d) level:**  
**Electronic energy (singlet):** -1352.640327 Hartrees  
**<S<sup>2</sup>> (singlet):** 0.3893  
**Electronic energy (triplet):** -1352.617231 Hartrees  
**<S<sup>2</sup>> (triplet):** 2.0613

**Cartesian coordinates:**

```
C,0,0.2445674507,1.2944760094,1.1763928779
C,0,0.2445674507,1.2944760094,-1.1763928779
C,0,0.3962382026,-1.2081183478,-1.0950005789
C,0,0.3962382026,-1.2081183478,1.0950005789
C,0,-1.0075797026,-1.5860452379,0.6952875939
C,0,-1.0075797026,-1.5860452379,-0.6952875939
C,0,-2.1128048985,-2.0037074025,-1.4205040765
C,0,-3.2396482318,-2.4175497548,0.6979461343
C,0,-3.2396482318,-2.4175497548,-0.6979461343
H,0,-4.1268813768,-2.7443126563,1.2308265493
H,0,-4.1268813768,-2.7443126563,-1.2308265493
C,0,-1.1726017385,1.4461951579,-0.6971762971
C,0,-1.1726017385,1.4461951579,0.6971762971
C,0,-2.3384272644,1.6752215913,-1.413658592
C,0,-3.5205230362,1.8979241698,-0.6973827377
C,0,-3.5205230362,1.8979241698,0.6973827377
H,0,-4.4476523301,2.0744320273,-1.233301204
H,0,-4.4476523301,2.0744320273,1.233301204
H,0,-2.115450993,-2.0054194334,-2.5058819754
H,0,-2.3380610675,1.6767169547,-2.4991454042
C,0,1.4034529392,-2.273737807,0.698630411
C,0,1.4034529392,-2.273737807,-0.698630411
C,0,2.1966496876,-3.1508781105,1.4196347407
C,0,2.1966496876,-3.1508781105,-1.4196347407
C,0,3.0049408393,-4.0401088487,0.6972197056
H,0,2.215724396,-3.1374018763,2.5045182824
C,0,3.0049408393,-4.0401088487,-0.6972197056
H,0,2.215724396,-3.1374018763,-2.5045182824
H,0,3.6484160994,-4.7319363029,1.231253336
H,0,3.6484160994,-4.7319363029,-1.231253336
C,0,1.1071463539,2.450168333,0.7024726142
C,0,1.8030520354,3.4152178758,1.4127015979
C,0,1.1071463539,2.450168333,-0.7024726142
C,0,2.508552999,4.3915585076,0.6964074943
H,0,1.8198710327,3.4035904688,2.4977257395
C,0,1.8030520354,3.4152178758,-1.4127015979
C,0,2.508552999,4.3915585076,-0.6964074943
H,0,3.0672186129,5.1509949885,1.2340090802
H,0,1.8198710327,3.4035904688,-2.4977257395
H,0,3.0672186129,5.1509949885,-1.2340090802
C,0,-2.1128048985,-2.0037074025,1.4205040765
H,0,-2.115450993,-2.0054194334,2.5058819754
C,0,-2.3384272644,1.6752215913,1.413658592
H,0,-2.3380610675,1.6767169547,2.4991454042
C,0,0.8280806317,0.0797087571,1.4680806688
C,0,0.8280806317,0.0797087571,-1.4680806688
F,0,2.1612607917,0.139402092,1.7705163402
F,0,2.1612607917,0.139402092,-1.7705163402
```



Ar = benzene-1,2-diyl, R<sup>1</sup> = CN, R<sup>2</sup> = H, localised structure

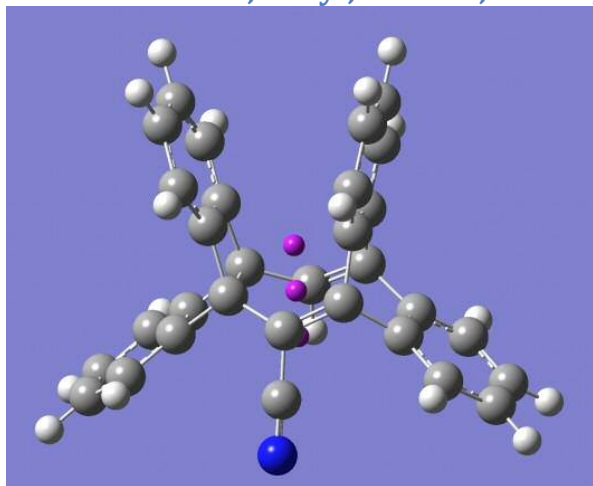

**RB3LYP/6-311+G(d) level:**  
**Allyl-allyl C–C bond length:** 1.75757 Å  
**Distance between terminal allyl C atoms:** 2.43594 Å  
**Sum of bond angles for terminal cyanoallyl C:** 352.810°  
**Sum of bond angles for terminal non-substituted allyl C:** 350.490°  
**Electronic energy:** -1246.365931 Hartrees  
**Gibbs free energy:** -1246.041731 Hartrees  
**Point group:** C<sub>1</sub>  
**No imaginary frequencies**

**UB3LYP/6-311+G(d)//RB3LYP/6-311+G(d) level:**  
**Electronic energy (singlet):** -1246.365931 Hartrees  
**<S<sup>2</sup>> (singlet):** 0.0000  
**NICS(0):** -1.9547 ppm  
**NICS(1):** 0.4268 ppm  
**NICS(-1):** -2.9005 ppm  
**Isotropic magnetic susceptibility:** -133.2188 cgs-ppm

**Cartesian coordinates:**

```
C,0,0.2263415121,1.3859231804,1.1861783992
C,0,0.2205270967,1.3851642861,-1.249755792
C,0,0.4505980112,-1.0953243327,-0.8857016832
C,0,0.4643852423,-1.1035233769,0.8717959357
C,0,-0.9573253167,-1.6309499792,0.6998997209
C,0,-0.9684923818,-1.6274135766,-0.6918991299
C,0,-2.0198060492,-2.1572259155,-1.4200702929
C,0,-3.0747712676,-2.6857056197,0.721814348
C,0,-3.0872299584,-2.682615287,-0.6769717693
H,0,-3.9207654453,-3.1073897689,1.2555141904
H,0,-3.9431881791,-3.1015456925,-1.1968507009
C,0,-1.1834228175,1.4383542003,-0.7320086151
C,0,-1.1757828034,1.4182453232,0.6677913332
C,0,-2.3785716957,1.5519346892,-1.428189863
C,0,-3.5726728608,1.6448264501,-0.7057509846
C,0,-3.5631129858,1.6231271112,0.6878959363
H,0,-4.515308942,1.735023719,-1.2358730465
H,0,-4.4975093961,1.6966320357,1.234746583
H,0,-2.0372518434,-2.1677249182,-2.5051290593
H,0,-2.3864824566,1.5653403886,-2.5133786494
C,0,1.5097294566,-2.2057690928,0.6781648484
C,0,1.4946341182,-2.2003619943,-0.7138262311
C,0,2.2895003459,-3.0882627697,1.4052476844
C,0,2.2588118272,-3.0796415228,-1.4617829929
C,0,3.0764560409,-3.9786938434,0.659698747
H,0,2.3232464357,-3.0892086148,2.4894536221
C,0,3.0618303171,-3.9748435647,-0.7384601627
H,0,2.2588472179,-3.0825050304,-2.5473015633
H,0,3.718509255,-4.6833290226,1.178519723
H,0,3.6908949347,-4.6788345821,-1.2741611516
C,0,0.9895336681,2.5952204803,0.6839622479
C,0,1.6404402208,3.5996150631,1.3812663311
C,0,0.9915354797,2.586855104,-0.7386085678
C,0,2.3029212012,4.6065312847,0.6672415117
H,0,1.6541546884,3.59617466,2.4659512593
C,0,1.6503563064,3.5879426875,-1.434321258
C,0,2.3092093197,4.5999509325,-0.7232032998
H,0,2.8188934604,5.3936413292,1.2070771693
H,0,1.6618070717,3.581557849,-2.5196957104
H,0,2.8283975716,5.3840741004,-1.2647563454
C,0,-1.9940448264,-2.1631491044,1.4470342083
H,0,-1.9903946763,-2.1784896679,2.5321756509
C,0,-2.3588114108,1.5087345389,1.3891223956
H,0,-2.3497030429,1.4923744946,2.474173354
C,0,0.8773022446,0.2168447431,1.4585517958
C,0,0.8765280595,0.2167510177,-1.4334213421
H,0,1.9481668248,0.2836335578,-1.6121095585
C,0,2.2400072313,0.2978316164,1.9014138485
N,0,3.3177175959,0.3455421639,2.3187891756
Bq,0,0.519280361,0.167639253,-0.008725448
Bq,0,-0.476568021,0.076758382,-0.00356137
Bq,0,1.515128743,0.258520124,-0.013889525
```

Ar = benzene-1,2-diyl, R<sup>1</sup> = CN, R<sup>2</sup> = H, delocalised structure

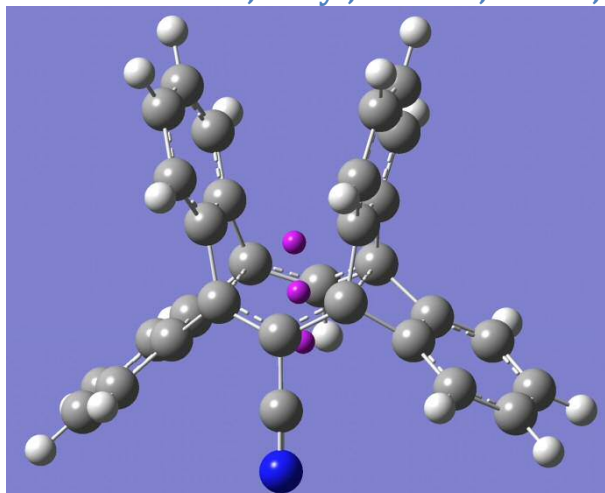

**RB3LYP/6-311+G(d) level:**  
**C<sup>≡</sup>C bond length:** 2.26877 Å  
**Electronic energy:** -1246.362638 Hartrees  
**Gibbs free energy:** -1246.040211 Hartrees  
**No imaginary frequencies**  
**Point group:** C<sub>s</sub>

**UB3LYP/6-311+G(d)//RB3LYP/6-311+G(d) level:**  
**Electronic energy (singlet):** -1246.364425 Hartrees  
**<S<sup>2</sup>> (singlet):** 0.4159  
**NICS(0):** -7.1148 ppm  
**NICS(1):** -1.1284 ppm  
**NICS(-1):** -4.6230 ppm  
**Isotropic magnetic susceptibility:** -163.7740 cgs-ppm  
**Electronic energy (triplet):** -1246.341934 Hartrees  
**<S<sup>2</sup>> (triplet):** 2.0700

**Cartesian coordinates:**

```
C,0,-0.0460981333,1.2624133663,1.247259433
C,0,-0.2716112503,-0.9951102777,1.2553527315
C,0,-0.2716112503,-0.9951102777,-1.2553527315
C,0,-0.0460981333,1.2624133663,-1.247259433
C,0,1.3219742625,0.6894549071,-1.5152837898
C,0,1.1828289096,-0.6962537094,-1.5082746307
C,0,2.2465081483,-1.5291077657,-1.822980664
C,0,3.6109736537,0.456865072,-2.1511674312
C,0,3.4719153279,-0.931242416,-2.1428994161
H,0,4.5706729091,0.8965092914,-2.4033580511
H,0,4.3248187712,-1.5557887185,-2.3885625075
C,0,1.1828289096,-0.6962537094,1.5082746307
C,0,1.3219742625,0.6894549071,1.5152837898
C,0,2.2465081483,-1.5291077657,1.822980664
C,0,3.4719153279,-0.931242416,2.1428994161
C,0,3.6109736537,0.456865072,2.1511674312
H,0,4.3248187712,-1.5557887185,2.3885625075
H,0,4.5706729091,0.8965092914,2.4033580511
H,0,2.1394996824,-2.6092959784,-1.8177960942
H,0,2.1394996824,-2.6092959784,1.8177960942
C,0,-0.9946936531,0.9247276103,-2.3839102801
C,0,-1.1321517209,-0.4714885844,-2.3940179581
C,0,-1.6468609671,1.7136976332,-3.3174247605
C,0,-1.9233319897,-1.1053344433,-3.3379931081
C,0,-2.4544127226,1.0765947966,-4.271351618
H,0,-1.5517427902,2.7952150604,-3.3045748727
C,0,-2.5894478306,-0.3096688658,-4.2813143622
H,0,-2.0516131784,-2.182761782,-3.3337926784
H,0,-2.9854533902,1.6722337944,-5.0068816713
H,0,-3.2265896738,-0.7808356356,-5.0226078703
C,0,-0.9946936531,0.9247276103,2.3839102801
C,0,-1.6468609671,1.7136976332,3.3174247605
C,0,-1.1321517209,-0.4714885844,2.3940179581
C,0,-2.4544127226,1.0765947966,4.271351618
H,0,-1.5517427902,2.7952150604,3.3045748727
C,0,-1.9233319897,-1.1053344433,3.3379931081
C,0,-2.5894478306,-0.3096688658,4.2813143622
H,0,-2.9854533902,1.6722337944,5.0068816713
H,0,-2.0516131784,-2.182761782,3.3337926784
H,0,-3.2265896738,-0.7808356356,5.0226078703
C,0,2.5291134027,1.2899424495,-1.8389801747
H,0,2.6396368893,2.3698057891,-1.8444866223
C,0,2.5291134027,1.2899424495,1.8389801747
H,0,2.6396368893,2.3698057891,1.8444866223
C,0,-0.558020713,1.6256792452,0.
C,0,-0.8433049167,-1.284994293,0.
C,0,-2.2655641349,-1.5307044568,0.
N,0,-3.3931729763,-1.7827742035,0.
H,0,-1.61153457,1.8983605186,0.
Bq,0,-0.339457399,0.145881855,0.
Bq,0,0.65553961,0.045977145,0.
Bq,0,-1.334454409,0.245786565,0.
```

Ar = benzene-1,2-diyl, R<sup>1</sup> = CN, R<sup>2</sup> = H, localised ⇌ delocalised TS

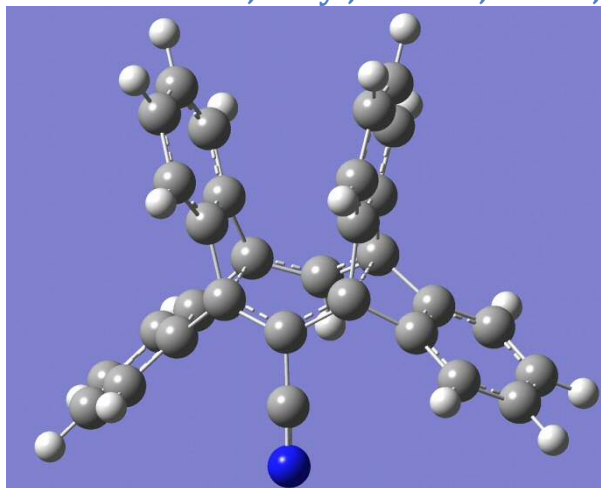

**RB3LYP/6-311+G(d) level:**  
**C<sup>∞</sup>C bond lengths:** 2.16835 Å, 2.33192 Å  
**Electronic energy:** -1246.362613 Hartrees  
**Gibbs free energy:** -1246.039458 Hartrees  
**Imaginary frequency:** 132.4i cm<sup>-1</sup>  
**Point group:** C<sub>1</sub>

**UB3LYP/6-311+G(d)//RB3LYP/6-311+G(d) level:**  
**Electronic energy (singlet):** -1246.363087 Hartrees  
**<S<sup>2</sup>> (singlet):** 0.2314  
**Electronic energy (triplet):** -1246.334382 Hartrees  
**<S<sup>2</sup>> (triplet):** 2.0667

**Cartesian coordinates:**

```
C,0,0.2747706652,1.2950554956,1.1532251767
C,0,0.2662571948,1.2884896665,-1.1786755915
C,0,0.4174885556,-1.2009050024,-1.0915844043
C,0,0.4237573768,-1.2088948602,1.076741837
C,0,-0.9870886812,-1.5774054785,0.6885092521
C,0,-0.9904071172,-1.5835300545,-0.7023296066
C,0,-2.0987494948,-2.0007664944,-1.4226232366
C,0,-3.222729463,-2.4001102616,0.7006715262
C,0,-3.2251913364,-2.4074803536,-0.6952263215
H,0,-4.109334613,-2.7212370456,1.2372673659
H,0,-4.1147149963,-2.7342242161,-1.2243516475
C,0,-1.15467768,1.446829287,-0.7081897884
C,0,-1.1477544663,1.4376576001,0.6863583249
C,0,-2.3251450824,1.6762054368,-1.4159213248
C,0,-3.503688761,1.8923229192,-0.6914026512
C,0,-3.4963754303,1.8825049234,0.7031455444
H,0,-4.4340166854,2.070447256,-1.2211750044
H,0,-4.4208483624,2.0527462908,1.2454971971
H,0,-2.1049374649,-2.0069743878,-2.5080452859
H,0,-2.3320402311,1.6829244877,-2.5014083984
C,0,1.4038924841,-2.3044495946,0.6866221318
C,0,1.4015483826,-2.294321101,-0.7122309491
C,0,2.1764677499,-3.2057307945,1.3999901578
C,0,2.1726358513,-3.1852429225,-1.440571835
C,0,2.9648426066,-4.1065845112,0.6690299286
H,0,2.2010470338,-3.2011480108,2.4846949152
C,0,2.9637362518,-4.0967178625,-0.7249123229
H,0,2.1831313314,-3.172999479,-2.5261736819
H,0,3.5939881372,-4.8153969667,1.1975169068
H,0,3.5899850452,-4.8000201619,-1.264390157
C,0,1.1040408952,2.4802411281,0.6868586203
C,0,1.7766748751,3.4661555151,1.3902173345
C,0,1.1013601332,2.4709548537,-0.7203981312
C,0,2.4605094588,4.452580516,0.6656657327
H,0,1.7991682114,3.462576963,2.475019242
C,0,1.7733064152,3.4481634825,-1.4367227664
C,0,2.4599233771,4.4437110638,-0.7264491048
H,0,3.0033536653,5.2267164108,1.1980682418
H,0,1.7817048913,3.4370175743,-2.5223863131
H,0,3.0002497439,5.2127560061,-1.269033585
C,0,-2.0924816506,-1.9865324724,1.4187168338
H,0,-2.0928178534,-1.9834070329,2.504144983
C,0,-2.3102181618,1.6567361897,1.4115882666
H,0,-2.304654722,1.6498312368,2.4970375257
C,0,0.8886219867,0.0823853217,1.4672845371
C,0,0.8846367302,0.0826686364,-1.4525685842
H,0,1.9580739483,0.139414918,-1.6224666144
C,0,2.2771279073,0.1530700848,1.8521215029
N,0,3.3729888812,0.2047518706,2.2150509916
```

Ar = benzene-1,2-diyl, R<sup>1</sup> = C≡C-H, R<sup>2</sup> = H, localised structure

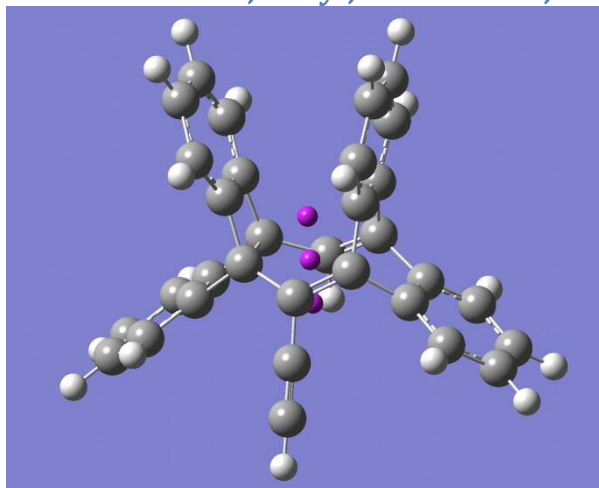

**RB3LYP/6-311+G(d) level:**  
**Allyl-allyl C–C bond length:** 1.75312 Å  
**Distance between terminal allyl C atoms:** 2.44627 Å  
**Sum of bond angles for terminal ethynylallyl C:** 350.443°  
**Sum of bond angles for terminal non-substituted allyl C:** 352.300°  
**Electronic energy:** -1230.261370 Hartrees  
**Gibbs free energy:** -1229.927205 Hartrees  
**No imaginary frequencies**  
**Point group:** C<sub>1</sub>

**UB3LYP/6-311+G(d)//RB3LYP/6-311+G(d) level:**  
**Electronic energy (singlet):** -1230.261370 Hartrees  
**<S<sup>2</sup>> (singlet):** 0.0000  
**NICS(0):** -2.1387 ppm  
**NICS(1):** 0.3933 ppm  
**NICS(-1):** -2.7982 ppm  
**Isotropic magnetic susceptibility:** -187.3886 cgs-ppm

**Cartesian coordinates:**

```
C,0,0.2510796425,-0.7371098619,1.1228803951
C,0,0.0515891569,1.0046127567,1.1166227866
C,0,0.061632409,1.3784865226,-1.3700389335
C,0,0.322101765,-1.0538740534,-1.3695902294
C,0,-1.1134883534,-0.6745888896,-1.5520318682
C,0,-1.2656408836,0.7174470442,-1.5761222076
C,0,-2.5053871449,1.2895151415,-1.8251328159
C,0,-3.4516446785,-0.9347073335,-2.0220061557
C,0,-3.602175022,0.4507303204,-2.0484822747
H,0,-4.31115983,-1.5737814028,-2.1973983477
H,0,-4.5783624446,0.8828417987,-2.2442788742
C,0,-1.3912754634,0.6573986608,1.4825793994
C,0,-1.232414261,-0.7255235584,1.4846110913
C,0,-2.5667291748,1.2635543251,1.8910729515
C,0,-3.6016717017,0.4054692685,2.2918708793
C,0,-3.4409569624,-0.984038367,2.2944607494
H,0,-4.5497743607,0.8267479244,2.6116610272
H,0,-4.2677047277,-1.6096226671,2.6165650745
H,0,-2.6223015541,2.3685189456,-1.8425629827
H,0,-2.700504816,2.3405873143,1.9005101028
C,0,1.1471544284,-0.4531110298,-2.490551847
C,0,1.0047249335,0.9626993194,-2.4812319446
C,0,1.9632772718,-1.0642220535,-3.429004802
C,0,1.6871188524,1.7356191462,-3.4076910763
C,0,2.6479743399,-0.2745452922,-4.3620421638
H,0,2.0826598638,-2.142528896,-3.4300124372
C,0,2.5141954116,1.1097342208,-4.3499681608
H,0,1.5848365855,2.8163404908,-3.3978794761
H,0,3.2888757595,-0.7494673331,-5.0980432023
H,0,3.0504387012,1.7115486111,-5.0768365646
C,0,1.1234976425,0.4512683429,2.3493716061
C,0,1.8484106276,-1.1034042289,3.3317727866
C,0,0.967367629,0.9319053718,2.3396796863
C,0,2.4343225974,-0.2917407364,4.3148210238
H,0,1.9839989371,-2.1796955576,3.3445809715
C,0,1.5335270963,1.7447985078,3.3071665981
C,0,2.2830933334,1.0985381203,4.3021095483
H,0,3.0232283341,-0.7506598464,5.1029886348
H,0,1.4214757252,2.8246526844,3.3069156464
H,0,2.7573173846,1.6881414706,5.0806171108
C,0,-2.2012794816,-1.5094154402,-1.7736661601
H,0,-2.0826583815,-2.5881308775,-1.7550218488
C,0,-2.2374350162,-1.5840448186,1.8958446141
H,0,-2.1208718282,-2.6630434625,1.9089469468
C,0,0.8853495533,-1.2615525558,-0.1401823581
C,0,0.562397279,1.615292026,-0.1367231811
C,0,2.281239533,-1.5522114089,-0.0604340164
C,0,3.4486034326,-1.8427674137,0.0255333812
H,0,4.4825684884,-2.0833690366,0.0964784761
H,0,1.6104343688,1.9040074728,-0.0827275448
Bq,0,0.355691634,0.157642472,-0.129505253
Bq,0,-0.637689436,0.044602561,-0.149902008
Bq,0,1.349072705,0.270682384,-0.109108499
```

Ar = benzene-1,2-diyl, R<sup>1</sup> = C≡C-H, R<sup>2</sup> = H, delocalised structure

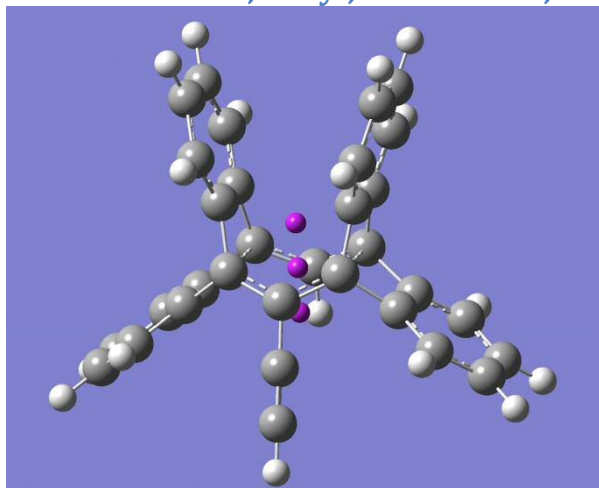

**RB3LYP/6-311+G(d) level:**  
**C≡C bond length:** 2.27341 Å  
**Electronic energy:** -1230.257344 Hartrees  
**Gibbs free energy:** -1229.925477 Hartrees  
**No imaginary frequencies**  
**Point group:** C<sub>s</sub>

**UB3LYP/6-311+G(d)//RB3LYP/6-311+G(d) level:**  
**Electronic energy (singlet):** -1230.259339 Hartrees  
**<S<sup>2</sup>> (singlet):** 0.4396  
**NICS(0):** -6.9312 ppm  
**NICS(1):** -0.9293 ppm  
**NICS(-1):** -4.6902 ppm  
**Isotropic magnetic susceptibility:** -175.9505 cgs-ppm  
**Electronic energy (triplet):** -1230.237478 Hartrees  
**<S<sup>2</sup>> (triplet):** 2.0732

**Cartesian coordinates:**

```
C,0,0.282095611,-0.9918979493,1.2483903691
C,0,0.0388476991,1.2684612408,1.2470422184
C,0,0.0388476758,1.2684612408,-1.2470422191
C,0,0.2820955877,-0.9918979492,-1.2483903743
C,0,-1.1753538869,-0.7021959366,-1.4974162902
C,0,-1.3249869694,0.6825400124,-1.5110651216
C,0,-2.5363747892,1.2726024831,-1.8382017472
C,0,-3.4638626686,-0.9559822933,-2.1317025113
C,0,-3.6128560025,0.4310181649,-2.1466294947
H,0,-4.3125025676,-1.5878623013,-2.3739486217
H,0,-4.5757911918,0.8628455062,-2.4004820545
C,0,-1.3249869412,0.6825400124,1.5110651463
C,0,-1.175353859,-0.7021959366,1.4974163121
C,0,-2.536374755,1.2726024831,1.8382017945
C,0,-3.6128559625,0.4310181649,-2.146629562
C,0,-3.4638626288,-0.9559822934,2.1317025759
H,0,-4.575791147,0.8628455062,2.4004821398
H,0,-4.3125025233,-1.5878623013,2.3739487021
H,0,-2.6542880394,2.3517850943,-1.848349653
H,0,-2.654288005,2.3517850943,1.8483497025
C,0,1.1250568383,-0.4624450694,-2.3976350282
C,0,0.9825684367,0.9331127386,-2.3876883869
C,0,1.9026771,-1.0926693464,-3.3557012224
C,0,1.6207660984,1.7239810249,-3.3299433292
C,0,2.5531740895,-0.2959992164,-4.3090824629
H,0,2.029134843,-2.1704487155,-3.3557533262
C,0,2.4174823063,1.0905542526,-4.2952520473
H,0,1.5201915689,2.8051301436,-3.3166099699
H,0,3.1762927591,-0.765770522,-5.0635656636
H,0,2.9353183581,1.6879039902,-5.0390217705
C,0,1.125056883,-0.4624450694,2.3976350073
C,0,1.9026771626,-1.0926693464,3.355701187
C,0,0.9825684812,0.9331127386,2.3876883686
C,0,2.5531741698,-0.2959992164,4.3090824153
H,0,2.0291349056,-2.1704487155,3.3557532883
C,0,1.6207661604,1.7239810249,3.3299432991
C,0,2.4174823864,1.0905542526,4.2952520023
H,0,3.1762928535,-0.765770522,5.0635656044
H,0,1.5201916307,2.8051301436,3.3166099416
H,0,2.935318452,1.6879039902,5.0390217158
C,0,-2.233913807,-1.5431080167,-1.8090738398
H,0,-2.1192883661,-2.6226164157,-1.7985172659
C,0,-2.2339137733,-1.5431080167,1.8090738814
H,0,-2.1192883326,-2.6226164157,1.7985173054
C,0,0.8756566385,-1.281475702,-0.0000000082
C,0,0.5504063251,1.6314705204,-0.0000000051
C,0,2.2937466121,-1.5150556224,-0.0000000214
C,0,3.475021734,-1.7502798286,-0.0000000324
H,0,4.5210327317,-1.9449625812,-0.0000000421
H,0,1.6025975896,1.9090895851,-0.0000000149
Bq,0,0.344658256,0.150520234,0.
Bq,0,-0.649194321,0.039808652,0.
Bq,0,1.338510834,0.261231815,0.
```

Ar = benzene-1,2-diyl, R<sup>1</sup> = C≡C-H, R<sup>2</sup> = H, localised ⇌ delocalised TS

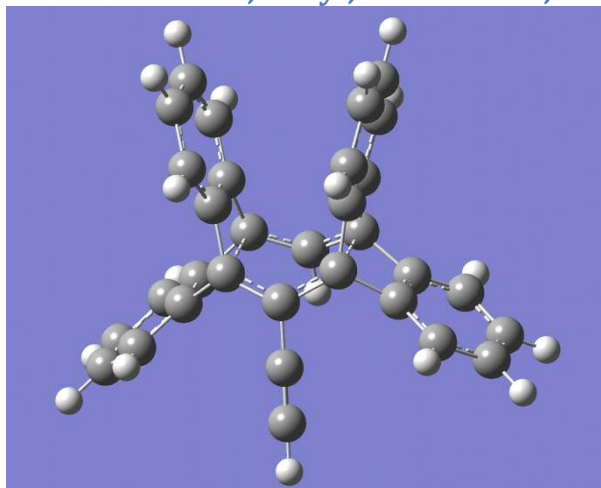

**RB3LYP/6-311+G(d) level:**  
**C-C bond lengths:** 2.20984 Å, 2.32013 Å  
**Electronic energy:** -1230.257367 Hartrees  
**Gibbs free energy:** -1229.924277 Hartrees  
**Imaginary frequency:** 84.1i cm<sup>-1</sup>  
**Point group:** C<sub>1</sub>

**UB3LYP/6-311+G(d)//RB3LYP/6-311+G(d) level:**  
**Electronic energy (singlet):** -1230.258615 Hartrees  
**<S<sup>2</sup>> (singlet):** 0.3613  
**Electronic energy (triplet):** -1230.234114 Hartrees  
**<S<sup>2</sup>> (triplet):** 2.0718

**Cartesian coordinates:**

C,0,0.2749757527,-0.9613611148,1.228038136  
C,0,0.0398463861,1.2359380061,1.2258085307  
C,0,0.0404607555,1.2958521834,-1.2676712909  
C,0,0.2876263121,-1.011076595,-1.2679489625  
C,0,-1.1655215151,-0.6969177529,-1.5032930118  
C,0,-1.3149914088,0.6891500295,-1.5189148913  
C,0,-2.5316578228,1.2758451337,-1.8332849904  
C,0,-3.4640559145,-0.9509957331,-2.1108390875  
C,0,-3.6127483144,0.4356686719,-2.1275722783  
H,0,-4.3149028329,-1.5840471531,-2.3419577592  
H,0,-4.5778425026,0.8682249831,-2.3717881565  
C,0,-1.3355776145,0.6802231339,1.5046213948  
C,0,-1.187395914,-0.7033815884,1.4928444512  
C,0,-2.5404412644,1.2755022912,1.8449678305  
C,0,-3.6125676416,0.4332291034,2.1679725676  
C,0,-3.4646496349,-0.9544180846,2.1551008819  
H,0,-4.5727355223,0.8651369312,2.4320380631  
H,0,-4.3115956292,-1.5839060964,2.4092953633  
H,0,-2.6484045405,2.3551617957,-1.8448741384  
H,0,-2.658620645,2.3546256125,1.8541045643  
C,0,1.1275556077,-0.4611356477,-2.4093632976  
C,0,0.9854327868,0.9374065206,-2.4001130106  
C,0,1.9113510669,-1.0882483764,-3.3646195827  
C,0,1.6309753932,1.7245037662,-3.3406561605  
C,0,2.5678311199,-0.293691599,-4.3153303733  
H,0,2.0361708932,-2.166224795,-3.364039265  
C,0,2.4327667144,1.0924085506,-4.3022952669  
H,0,1.5298320664,2.805605172,-3.3279281875  
H,0,3.1935535653,-0.7649805814,-5.0666928146  
H,0,2.9535336799,1.690387165,-5.0435061671  
C,0,1.1212202636,-0.4621070308,2.3888235476  
C,0,1.8894167498,-1.0973363399,3.3508996463  
C,0,0.9799002256,0.9307454254,2.3782655278  
C,0,2.5324972099,-0.2992650984,4.3084232748  
H,0,2.0158583197,-2.1750854678,3.352159851  
C,0,1.6093156959,1.7246577579,3.3236913802  
C,0,2.3978276644,1.0880760938,4.293945178  
H,0,3.1505296884,-0.7682854707,5.0675661406  
H,0,1.5105417751,2.8059505212,3.310581541  
H,0,2.9116855252,1.6836437822,5.0419071583  
C,0,-2.2302573295,-1.5358061293,-1.800595913  
H,0,-2.1150570955,-2.6152523216,-1.7886617771  
C,0,-2.2396327264,-1.5457117705,1.81979218  
H,0,-2.1269475381,-2.6254016477,1.8111050015  
C,0,0.8748805465,-1.2795548193,-0.0232972938  
C,0,0.5514067332,1.6315813611,-0.0231259342  
C,0,2.2921366893,-1.5156051938,-0.0094848038  
C,0,3.4728446414,-1.7535716707,0.0046115028  
H,0,4.518374123,-1.9504516719,0.0156839902  
H,0,1.6036594156,1.9088824184,-0.0143932891

Ar = benzene-1,2-diyl, R<sup>1</sup> = R<sup>2</sup> = Me, localised structure

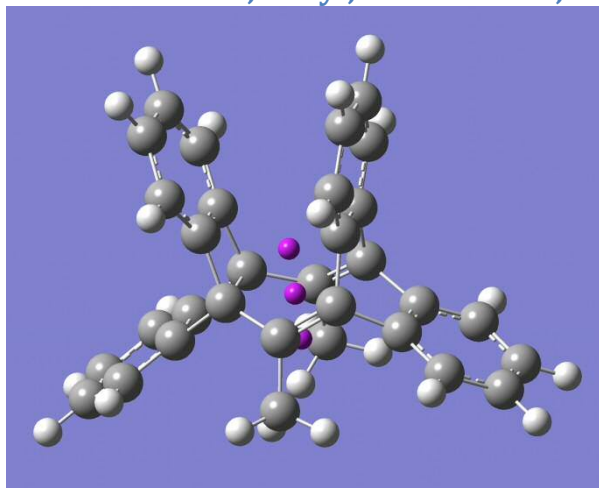

**RB3LYP/6-311+G(d) level:**  
**Allyl-allyl C–C bond length:** 1.75014 Å  
**Distance between terminal allyl C atoms:** 2.46986 Å  
**Sum of bond angles for terminal methylallyl C:** 351.272°  
**Electronic energy:** -1232.736564 Hartrees  
**Gibbs free energy:** -1232.358179 Hartrees  
**No imaginary frequencies**  
**Point group:** C<sub>s</sub>

**UB3LYP/6-311+G(d)//RB3LYP/6-311+G(d) level:**  
**Electronic energy (singlet):** -1232.736564 Hartrees  
**<S<sup>2</sup>> (singlet):** 0.0000  
**NICS(0):** -2.0522 ppm  
**NICS(1):** 0.3287 ppm  
**NICS(-1):** -3.0108 ppm  
**Isotropic magnetic susceptibility:** -52.2288 cgs-ppm

**Cartesian coordinates:**

```
C,0,0.0108720595,1.8368067822,-0.2340148641
C,0,-1.8272370445,0.187094129,-0.2347102904
C,0,0.0866987562,-1.4066725799,-0.1919632066
C,0,1.389184933,-0.2376842356,-0.1914706053
C,0,1.4897255885,-0.6187087276,1.2870556527
C,0,0.4540567846,-1.5482268968,1.2866639547
C,0,0.1811022446,-2.3479114997,2.3827821387
C,0,2.0363415111,-1.2235201454,3.509629872
C,0,0.9955385212,-2.157646443,3.5092362176
H,0,2.6438979414,-1.1114594623,4.4024107931
H,0,0.8183119668,-2.7499327714,4.4017203048
C,0,-1.5418373329,0.6701408872,1.1533216785
C,0,-0.5006881575,1.6045776877,1.1537155307
C,0,-2.2236297537,0.3705622495,2.3256342201
C,0,-1.8488669344,1.0149913408,3.5088755403
C,0,-0.8114468994,1.9460810511,3.5092680079
H,0,-2.3722216479,0.790500639,4.4330079538
H,0,-0.5322755163,2.441861588,4.4337040203
H,0,-0.6192352923,-3.0811728073,2.3920332741
H,0,-3.0333501535,-0.352628796,2.3235114827
C,0,2.1010488557,-1.2976496789,-1.0428165054
C,0,1.0641740518,-2.2282504607,-1.0432085998
C,0,3.3267652676,-1.5637163205,-1.6306031221
C,0,1.1969091009,-3.4752740062,-1.6314084032
C,0,3.4678639163,-2.8165004321,-2.2473275632
H,0,4.1455826329,-0.8509563857,-1.6317872143
C,0,2.4274636829,-3.7502654498,-2.2477208565
H,0,0.4000967121,-4.2125506355,-1.6332034158
H,0,4.4052607835,-3.0698790499,-2.7327838554
H,0,2.5785983715,-4.709318762,-2.7334743703
C,0,-1.1463379435,2.3457997873,-1.0772889781
C,0,-1.2943090297,3.5440317791,-1.7608383224
C,0,-2.2082642213,1.3927153927,-1.07769064
C,0,-2.480941856,3.8058677841,-2.4586285424
H,0,-0.4929722563,4.2766184045,-1.7549348305
C,0,-3.3832990294,1.6691524836,-1.7616283692
C,0,-3.5154989424,2.8773475012,-2.4590197614
H,0,-2.5934012061,4.7432929533,-2.9941416695
H,0,-4.1979429878,0.9513879931,-1.7563361031
H,0,-4.4351316238,3.0903304446,-2.9948381656
C,0,2.3136997293,-0.4338938386,2.3835887029
H,0,3.1289003715,0.2827989333,2.3934508067
C,0,-0.1299033292,2.249692423,2.3264262896
H,0,0.6763012216,2.9768023421,2.3249149287
C,0,0.995498561,1.0838663098,-0.7911392654
C,0,-1.1845044009,-0.8726980515,-0.7919641059
C,0,1.4178838032,1.3075634134,-2.2250044583
H,0,0.9613835057,2.2022666714,-2.6452354267
H,0,2.5050191024,1.4291492713,-2.2820403132
H,0,1.1720042629,0.4609903419,-2.8718533305
C,0,-1.4517967237,-1.2679901755,-2.226090375
H,0,-1.6897547161,-2.3356815229,-2.2836276932
H,0,-2.2919446779,-0.7176125856,-2.6464668634
H,0,-0.5833925633,-1.1144888636,-2.8725172836
Bq,0,-0.088247856,0.098452059,-0.405877056
Bq,0,-0.102229516,0.113608989,0.593910311
Bq,0,-0.074266196,0.083295129,-1.405664424
```

Ar = benzene-1,2-diyl, R<sup>1</sup> = R<sup>2</sup> = Me, delocalised structure

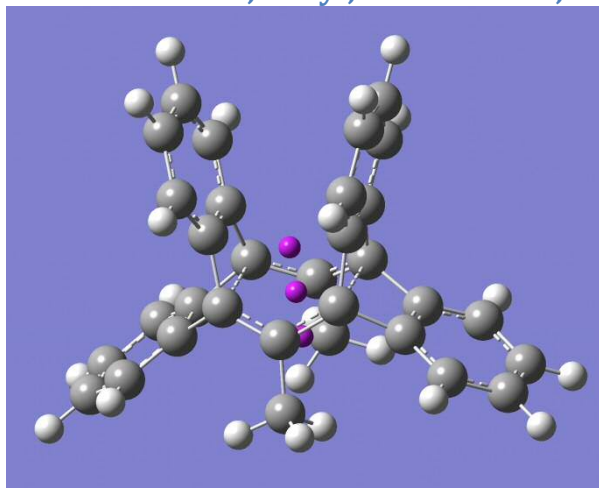

**RB3LYP/6-311+G(d) level:**  
**C<sup>∞</sup>C bond length:** 2.29258 Å  
**Electronic energy:** -1232.736564 Hartrees  
**Gibbs free energy:** -1232.358179 Hartrees  
**No imaginary frequencies**  
**Point group:** C<sub>2</sub>

**UB3LYP/6-311+G(d)//RB3LYP/6-311+G(d) level:**  
**Electronic energy (singlet):** -1232.739136 Hartrees  
**<S<sup>2</sup>> (singlet):** 0.4884  
**NICS(0):** -5.7726 ppm  
**NICS(1):** 0.2475 ppm  
**NICS(-1):** -5.3664 ppm  
**Isotropic magnetic susceptibility:** -13.6779 cgs-ppm  
**Electronic energy (triplet):** -1232.719173 Hartrees  
**<S<sup>2</sup>> (triplet):** 2.0672

**Cartesian coordinates:**

C,0,-1.1416247887,-1.2318948307,-0.1909413995  
C,0,1.1508934431,-1.2321626924,-0.207283968  
C,0,1.1416247887,1.2318948307,-0.1909413995  
C,0,-1.1508934431,1.2321626924,-0.207283968  
C,0,-0.7095048734,1.4698647844,1.2160278401  
C,0,0.6825982745,1.4645195586,1.2268363721  
C,0,1.3931041527,1.7888707306,2.3731389757  
C,0,-0.7276262655,2.120509587,3.514915526  
C,0,0.6672449033,2.1128278235,3.5267283232  
H,0,-1.2692417116,2.3776605868,4.4198428055  
H,0,1.1962114249,2.3636346643,4.4408906652  
C,0,0.7095048734,-1.4698647844,1.2160278401  
C,0,-0.6825982745,-1.4645195586,1.2268363721  
C,0,1.4367355651,-1.8025382136,2.3493222462  
C,0,0.7276262655,-2.120509587,3.514915526  
C,0,-0.6672449033,-2.1128278235,3.5267283232  
H,0,1.2692417116,-2.3776605868,4.4198428055  
H,0,-1.1962114249,-2.3636346643,4.4408906652  
H,0,2.4788916611,1.7866969503,2.3834206605  
H,0,2.522515343,-1.8106534058,2.3405649251  
C,0,-0.70129701,2.4182028525,-1.0503009153  
C,0,0.7038301129,2.416960582,-1.0396816639  
C,0,-1.4045146206,3.4261926587,-1.6938109295  
C,0,1.420665684,3.4184349312,-1.6771904395  
C,0,-0.6813540616,4.4326607348,-2.350997306  
H,0,-2.4905128602,3.4348356442,-1.7017216079  
C,0,0.7112555686,4.4282934497,-2.343790011  
H,0,2.5065433469,3.418997285,-1.6741771581  
H,0,-1.2135172308,5.2238694422,-2.8696577104  
H,0,1.2537128519,5.2155536374,-2.8578039103  
C,0,-0.7038301129,-2.416960582,-1.0396816639  
C,0,-1.420665684,-3.4184349312,-1.6771904395  
C,0,0.70129701,-2.4182028525,-1.0503009153  
C,0,-0.7112555686,-4.4282934497,-2.343790011  
H,0,-2.5065433469,-3.418997285,-1.6741771581  
C,0,1.4045146206,-3.4261926587,-1.6938109295  
C,0,0.6813540616,-4.4326607348,-2.350997306  
H,0,-1.2537128519,-5.2155536374,-2.8578039103  
H,0,2.4905128602,-3.4348356442,-1.7017216079  
H,0,1.2135172308,-5.2238694422,-2.8696577104  
C,0,-1.4367355651,1.8025382136,2.3493222462  
H,0,-2.522515343,1.8106534058,2.3405649251  
C,0,-1.3931041527,-1.7888707306,2.3731389757  
H,0,-2.4788916611,-1.7866969503,2.3834206605  
C,0,-1.4898720108,-0.0046267219,-0.7828520018  
C,0,1.4898720108,0.0046267219,-0.7828520018  
C,0,-1.9095981647,-0.0361849011,-2.2442949461  
H,0,-2.8511124982,-0.5806806448,-2.3555963789  
H,0,-2.0579480543,0.9637214882,-2.646778883  
H,0,-1.1760673297,-0.5479197933,-2.8718552292  
C,0,1.9095981647,0.0361849011,-2.2442949461  
H,0,2.8511124982,0.5806806448,-2.3555963789  
H,0,2.0579480543,-0.9637214882,-2.646778883  
H,0,1.1760673297,0.5479197933,-2.8718552292  
Bq,0,0,0,-0.393692456  
Bq,0,0,0,0.007127545,-0.006605257,0.606260327  
Bq,0,-0.007127545,0.006605257,-1.39364524



Ar = benzene-1,2-diyl, R<sup>1</sup> = R<sup>2</sup> = Me, localised  $\rightleftharpoons$  delocalised TS

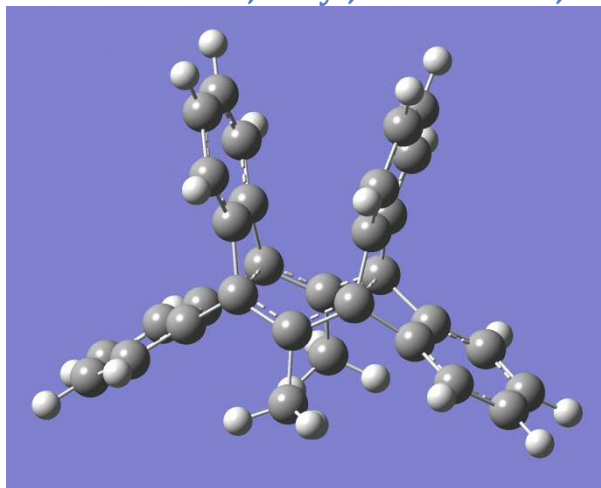

**RB3LYP/6-311+G(d) level:**  
**C<sup>∞</sup>C bond lengths:** 2.27784 Å, 2.30408 Å  
**Electronic energy:** -1232.736620 Hartrees  
**Gibbs free energy:** -1232.358040 Hartrees  
**Imaginary frequency:** 86.5i cm<sup>-1</sup>  
**Point group:** C<sub>1</sub>

**UB3LYP/6-311+G(d)//RB3LYP/6-311+G(d) level:**  
**Electronic energy (singlet):** -1232.739008 Hartrees  
**<S<sup>2</sup>> (singlet):** 0.4783  
**Electronic energy (triplet):** -1232.718758 Hartrees  
**<S<sup>2</sup>> (triplet):** 2.0671

**Cartesian coordinates:**

```
C,0,0.0262970905,1.6931486387,-0.1948943438
C,0,-1.6807865358,0.1457995604,-0.2133182444
C,0,-0.0131476453,-1.6672286344,-0.2006511751
C,0,1.675533668,-0.1385490223,-0.2063447427
C,0,1.5124919726,-0.6122541937,1.2171758064
C,0,0.478110175,-1.5435829659,1.2208812441
C,0,0.1674492075,-2.2685699959,2.3618658879
C,0,1.9589545738,-1.0947799224,3.5133016788
C,0,0.9213181607,-2.0272306951,3.5178171386
H,0,2.5306129589,-0.92604741,4.4205627575
H,0,0.6970801876,-2.573670727,4.4285946129
C,0,-1.5056538051,0.6185627098,1.2088481509
C,0,-0.4732541881,1.5528875389,1.2207651219
C,0,-2.2631975227,0.3702187957,2.3440146966
C,0,-1.9519635196,1.0797220831,3.5110295818
C,0,-0.9172970199,2.0151451128,3.5232431071
H,0,-2.5230223108,0.9009700035,4.4167509081
H,0,-0.6939746997,2.5546336258,4.4383763182
H,0,-0.6375656564,-2.997224672,2.3665543564
H,0,-3.0704663874,-0.3559521667,2.3349520692
C,0,2.1480171621,-1.3143341317,-1.0510354149
C,0,1.1059102242,-2.255633888,-1.0481420787
C,0,3.3503755877,-1.5879876484,-1.6863932792
C,0,1.2495876582,-3.4786730541,-1.6859474844
C,0,3.4937428638,-2.8189879133,-2.3435203246
H,0,4.1616193823,-0.8658962472,-1.6879914665
C,0,2.4579865824,-3.7502564071,-2.3444571791
H,0,0.4448980762,-4.207783054,-1.6890166242
H,0,4.4226737823,-3.0481789899,-2.8561641006
H,0,2.587736207,-4.6973109777,-2.8587608144
C,0,-1.0954226108,2.2719854671,-1.0451281043
C,0,-1.2385239922,3.4958256688,-1.6815652412
C,0,-2.1383865917,1.3294340582,-1.0553805051
C,0,-2.442695656,3.769029157,-2.3468590762
H,0,-0.4354491717,4.2267313041,-1.676402524
C,0,-3.3363768831,1.6054755707,-1.6982810526
C,0,-3.4775021772,2.8372338365,-2.3542369471
H,0,-2.5697595035,4.7177092007,-2.8588221875
H,0,-4.1468153854,0.8825275925,-1.7056000761
H,0,-4.4038894067,3.0664426664,-2.8714542983
C,0,2.2725704135,-0.3753427567,2.3527408223
H,0,3.0819151851,0.3485084632,2.3501559741
C,0,-0.1653412845,2.2680821181,2.3687156903
H,0,0.6375935571,2.9989619058,2.3787981213
C,0,1.1001405153,1.008681356,-0.7842052805
C,0,-1.1035387609,-0.996285808,-0.7897610934
C,0,1.3744369881,1.2896518754,-2.2541907927
H,0,1.5521961099,2.3550628637,-2.4149616995
H,0,2.2481572939,0.7495885071,-2.6134417801
H,0,0.526592839,1.0127076428,-2.8868623518
C,0,-1.4120459543,-1.3161605196,-2.2440555975
H,0,-1.8547270519,-2.3137745781,-2.3218432552
H,0,-2.1186094602,-0.6102646402,-2.676143383
H,0,-0.5145852416,-1.3227663032,-2.8661375259
```

Ar = benzene-1,2-diyl, R<sup>1</sup> = NH<sub>2</sub>, R<sup>2</sup> = H, localised structure

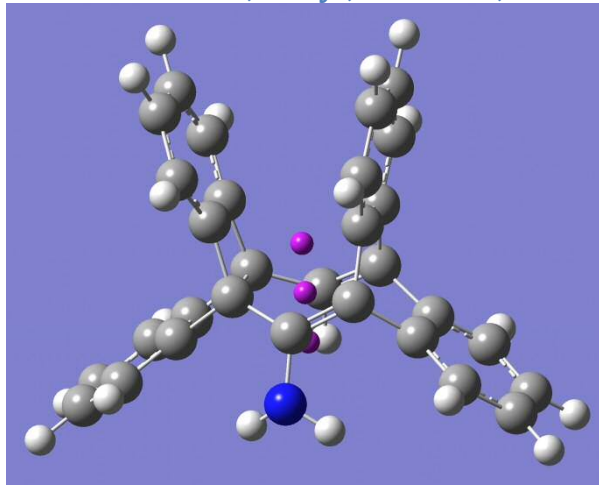

**RB3LYP/6-311+G(d) level:**  
**Allyl-allyl C–C bond length:** 1.73717 Å  
**Distance between terminal allyl C atoms:** 2.48119 Å  
**Sum of bond angles for terminal aminoallyl C:** 348.747°  
**Sum of bond angles for terminal non-substituted allyl C:** 351.131°  
**Electronic energy:** -1209.476524 Hartrees  
**Gibbs free energy:** -1209.131918 Hartrees  
**No imaginary frequencies**  
**Point group:** C<sub>1</sub>

**UB3LYP/6-311+G(d)//RB3LYP/6-311+G(d) level:**  
**Electronic energy (singlet):** -1209.476524 Hartrees  
**<S<sup>2</sup>> (singlet):** 0.0000  
**NICS(0):** -1.1916 ppm  
**NICS(1):** 0.9474 ppm  
**NICS(-1):** -2.5898 ppm  
**Isotropic magnetic susceptibility:** -102.4002 cgs-ppm

**Cartesian coordinates:**

```
C,0,-1.3973853206,-0.1428265204,-1.1856440367
C,0,-1.382833551,-0.0394864595,1.2933514125
C,0,1.0847135767,-0.3174701731,0.9475378815
C,0,1.0811682749,-0.4167510301,-0.7867928959
C,0,1.6292836229,1.0051224411,-0.6987701865
C,0,1.6383833853,1.0854282138,0.6907522638
C,0,2.18724187,2.1632806973,1.363381311
C,0,2.7140334674,3.102958442,-0.8320549296
C,0,2.7221066164,3.184809094,0.5644511797
H,0,3.1410554268,3.9168875239,-1.4097841219
H,0,3.1550672114,4.060514988,1.038082981
C,0,-1.4126954162,1.3369969754,0.7083703271
C,0,-1.3952844926,1.2698395299,-0.6920352027
C,0,-1.5076004135,2.5558913922,1.3667881081
C,0,-1.5747748731,3.7282675895,0.6074740889
C,0,-1.5514028868,3.6692300064,-0.7850717535
H,0,-1.6467382456,4.6896990237,1.1062900047
H,0,-1.6057854,4.586003541,-1.3639806345
H,0,2.2034649511,2.2358184617,2.4461484072
H,0,-1.5229796287,2.5990622881,2.4515421264
C,0,2.1949018486,-1.4479226878,-0.554228468
C,0,2.1858016678,-1.3745578417,0.8377588852
C,0,3.087631894,-2.253321215,-1.243616101
C,0,3.0616894594,-2.107967997,1.619296536
C,0,3.9755040037,-3.0104129915,-0.4616414251
H,0,3.1070542008,-2.3160048661,-2.3270812088
C,0,3.9612103299,-2.941027717,0.9342768917
H,0,3.0628467943,-2.0604218094,2.7038283628
H,0,4.6903992298,-3.6650930188,-0.9501884895
H,0,4.6644994904,-3.5449749723,1.4991658638
C,0,-2.5954877964,-0.8707798305,-0.6032628499
C,0,-3.6108565744,-1.5594540972,-1.2548117923
C,0,-2.5884524092,-0.8208754514,0.8212812884
C,0,-4.61158867,-2.2005010993,-0.5091179735
H,0,-3.6330217584,-1.5942713753,-2.3403268845
C,0,-3.583444694,-1.4501849478,1.5523823672
C,0,-4.5975318132,-2.1471186237,0.8796765579
H,0,-5.4047720639,-2.7349305997,-1.02258782
H,0,-3.5728962295,-1.4106560535,2.6373802048
H,0,-5.3778285427,-2.6421851563,1.4491187676
C,0,2.1702394464,1.9958340918,-1.4996913224
H,0,2.1728041285,1.9411388343,-2.5835599648
C,0,-1.4666545502,2.4381363604,-1.4427296949
H,0,-1.4565786662,2.3913554206,-2.527304517
C,0,-0.2408283364,-0.8596490362,-1.3511088516
C,0,-0.2289109694,-0.6984716224,1.5348319803
H,0,-0.3075652841,-1.7559838961,1.7811679128
N,0,-0.2775823146,-2.1955278766,-1.7296705875
H,0,-1.1920837037,-2.6258818129,-1.7547968031
H,0,0.4416573679,-2.7997026261,-1.3600976151
Bq,0,-0.180679388,-0.412442474,0.075362582
Bq,0,-0.289507413,-1.405166527,0.126893305
Bq,0,-0.071851362,0.580281579,0.023831859
```

Ar = benzene-1,2-diyl, R<sup>1</sup> = NH<sub>2</sub>, R<sup>2</sup> = H, delocalised structure

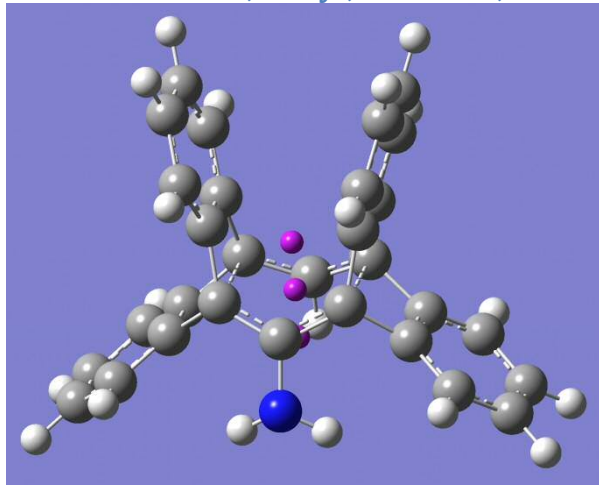

**RB3LYP/6-311+G(d) level:**  
**C<sup>∞</sup>C bond length:** 2.29192 Å  
**Electronic energy:** -1209.470861 Hartrees  
**Gibbs free energy:** -1209.127315 Hartrees  
**Imaginary frequency:** 14.6i cm<sup>-1</sup>  
**Point group:** C<sub>s</sub>

**UB3LYP/6-311+G(d)//RB3LYP/6-311+G(d) level:**  
**Electronic energy (singlet):** -1209.473545 Hartrees  
**<S<sup>2</sup>> (singlet):** 0.5032  
**NICS(0):** -6.7001 ppm  
**NICS(1):** -0.5436 ppm  
**NICS(-1):** -4.6734 ppm  
**Isotropic magnetic susceptibility:** -58.5974 cgs-ppm  
**Electronic energy (triplet):** -1209.454598 Hartrees  
**<S<sup>2</sup>> (triplet):** 2.0647

**Cartesian coordinates:**

```
C,0,0.3010565639,1.0582742154,-1.2417612088
C,0,0.1741183282,-1.2301276533,-1.2452495146
C,0,0.174118329,-1.2301276533,1.2452495145
C,0,0.3010565647,1.0582742154,1.2417612086
C,0,-1.1360423973,0.6866970167,1.4884527371
C,0,-1.2146377942,-0.7043903655,1.5093985964
C,0,-2.3920790576,-1.356251343,1.8440380635
C,0,-3.4357523519,0.8210033141,2.1278965538
C,0,-3.5116730631,-0.571814748,2.1499915687
H,0,-4.3163268282,1.4085121969,2.3683037794
H,0,-4.4502268112,-1.0527744583,2.4071309814
C,0,-1.2146377952,-0.7043903655,-1.5093985956
C,0,-1.1360423983,0.6866970167,-1.4884527363
C,0,-2.3920790588,-1.356251343,-1.8440380619
C,0,-3.5116730645,-0.5718147479,-2.1499915664
C,0,-3.4357523532,0.8210033141,-2.1278965515
H,0,-4.4502268127,-1.0527744583,-2.4071309785
H,0,-4.3163268297,1.4085121969,-2.3683037765
H,0,-2.4524911165,-2.4402282375,1.8596759032
H,0,-2.4524911177,-2.4402282375,-1.8596759016
C,0,1.1691049109,0.5589465597,2.3875620703
C,0,1.1050371307,-0.8442300731,2.3784288238
C,0,1.9267697043,1.2283001403,3.3384360641
C,0,1.8004024273,-1.5978582684,3.3103969018
C,0,2.6377243697,0.4679267833,4.2810943283
H,0,1.9823678725,2.3129758814,3.3485386073
C,0,2.5779573873,-0.9229316667,4.2649300248
H,0,1.7587445253,-2.6829175103,3.2980581875
H,0,3.2427085701,0.9708565982,5.0288689316
H,0,3.1387237783,-1.4925530364,4.999269573
C,0,1.1691049093,0.5589465597,-2.387562071
C,0,1.9267697021,1.2283001403,-3.3384360654
C,0,1.1050371291,-0.8442300731,-2.3784288245
C,0,2.637724367,0.4679267834,-4.28109433
H,0,1.9823678703,2.3129758814,-3.3485386086
C,0,1.8004024251,-1.5978582684,-3.310396903
C,0,2.5779573845,-0.9229316667,-4.2649300265
H,0,3.2427085668,0.9708565983,-5.0288689337
H,0,1.7587445231,-2.6829175103,-3.2980581886
H,0,3.138723775,-1.4925530364,-4.999269575
C,0,-2.2383987849,1.4699097792,1.801044515
H,0,-2.1804505396,2.5539574944,1.7862034406
C,0,-2.2383987861,1.4699097792,-1.8010445136
H,0,-2.1804505407,2.5539574944,-1.7862034392
C,0,0.8962951496,1.3674414649,-0.0000000003
C,0,0.7008914169,-1.5757709071,-0.0000000002
N,0,2.2601287812,1.6937858682,-0.0000000007
H,0,2.7644720428,1.4415623973,-0.8383276639
H,0,2.7644720433,1.4415623973,0.8383276621
H,0,1.7625727485,-1.8168034999,-0.0000000006
Bq,0,0.424589392,-0.092006053,-1.33333E-10
Bq,0,-0.573512975,-0.03042955,1.47528E-10
Bq,0,1.422691759,-0.153582556,-4.14194E-10
```

Ar = benzene-1,2-diyl, R<sup>1</sup> = R<sup>2</sup> = Cl, localised structure

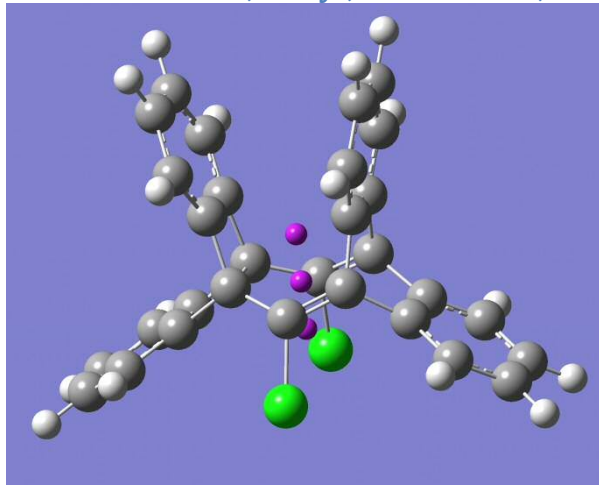

**RB3LYP/6-311+G(d) level:**  
**Allyl-allyl C–C bond length:** 1.73920 Å  
**Distance between terminal allyl C atoms:** 2.45394 Å  
**Sum of bond angles for terminal chloroallyl C:** 351.852°  
**Electronic energy:** -2073.343216 Hartrees  
**Gibbs free energy:** -2073.037812 Hartrees  
**No imaginary frequencies**  
**Point group:** C<sub>s</sub>

**UB3LYP/6-311+G(d)//RB3LYP/6-311+G(d) level:**  
**Electronic energy (singlet):** -2073.343216 Hartrees  
**<S<sup>2</sup>> (singlet):** 0.0000  
**NICS(0):** -0.2226 ppm  
**NICS(1):** 1.2443 ppm  
**NICS(-1):** -1.3167 ppm  
**Isotropic magnetic susceptibility:** -58.5555 cgs-ppm

**Cartesian coordinates:**

```
C,0,0.2732969298,1.4001160052,1.2269700486
C,0,0.2732969298,1.4001160052,-1.2269700486
C,0,0.5170740337,-1.0802908006,-0.8695983374
C,0,0.5170740337,-1.0802908006,0.8695983374
C,0,-0.9148110232,-1.593360863,0.695794479
C,0,-0.9148110232,-1.593360863,-0.695794479
C,0,-1.9555483173,-2.1277300547,-1.4341845601
C,0,-3.0284384073,-2.6541549285,0.6993330402
C,0,-3.0284384073,-2.6541549285,-0.6993330402
H,0,-3.8782418201,-3.0768291623,1.2261564834
H,0,-3.8782418201,-3.0768291623,-1.2261564834
C,0,-1.1287591082,1.4073119726,-0.6987907068
C,0,-1.1287591082,1.4073119726,0.6987907068
C,0,-2.3179208554,1.5017447111,-1.4087504249
C,0,-3.518113079,1.5944576466,-0.6970675871
C,0,-3.518113079,1.5944576466,0.6970675871
H,0,-4.4573372159,1.6699155474,-1.2355228865
H,0,-4.4573372159,1.6699155474,1.2355228865
H,0,-1.9617625182,-2.1421622953,-2.5192235788
H,0,-2.3159061924,1.5033225096,-2.4940117007
C,0,1.5211186538,-2.227228703,0.6953394613
C,0,1.5211186538,-2.227228703,-0.6953394613
C,0,2.2243253094,-3.1594301437,1.4333713191
C,0,2.2243253094,-3.1594301437,-1.4333713191
C,0,2.9551223741,-4.1043353425,0.6995941064
H,0,2.2367375399,-3.1637038288,2.518021688
C,0,2.9551223741,-4.1043353425,-0.6995941064
H,0,2.2367375399,-3.1637038288,-2.518021688
H,0,3.5377920667,-4.8532379567,1.2267788655
H,0,3.5377920667,-4.8532379567,-1.2267788655
C,0,1.00038073,2.6255807251,0.7111183919
C,0,1.5973886432,3.6650129577,1.4065275281
C,0,1.00038073,2.6255807251,-0.7111183919
C,0,2.1981612953,4.7108849088,0.6954943606
H,0,1.6091946044,3.6599514754,2.491233894
C,0,1.5973886432,3.6650129577,-1.4065275281
C,0,2.1981612953,4.7108849088,-0.6954943606
H,0,2.6681967833,5.5257713699,1.2365452132
H,0,1.6091946044,3.6599514754,-2.491233894
H,0,2.6681967833,5.5257713699,-1.2365452132
C,0,-1.9555483173,-2.1277300547,1.4341845601
H,0,-1.9617625182,-2.1421622953,2.5192235788
C,0,-2.3179208554,1.5017447111,1.4087504249
H,0,-2.3159061924,1.5033225096,2.4940117007
C,0,0.9152653464,0.2335358533,1.464434265
C,0,0.9152653464,0.2335358533,-1.464434265
Cl,0,2.6047350785,0.3126108586,1.9938720301
Cl,0,2.6047350785,0.3126108586,-1.9938720301
Bq,0,0.568545437,0.184453686,0.
Bq,0,-0.426918386,0.089312859,0.
Bq,0,1.56400926,0.279594513,0.
```

Ar = benzene-1,2-diyl, R<sup>1</sup> = R<sup>2</sup> = Cl, delocalised structure

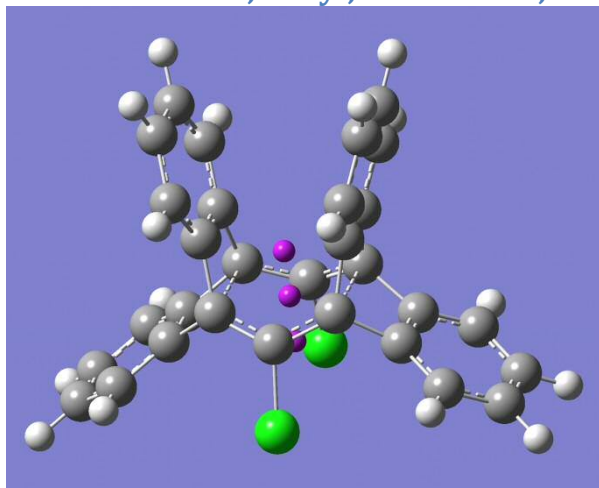

**RB3LYP/6-311+G(d) level:**  
**C<sup>∞</sup>C bond length:** 2.26908 Å  
**Electronic energy:** -2073.337536 Hartrees  
**Gibbs free energy:** -2073.032933 Hartrees  
**Imaginary frequency:** 71.9i cm<sup>-1</sup>  
**Point group:** C<sub>2v</sub>

**UB3LYP/6-311+G(d)//RB3LYP/6-311+G(d) level:**  
**Electronic energy (singlet):** -2073.339454 Hartrees  
**<S<sup>2</sup>> (singlet):** 0.4176  
**NICS(0):** -6.4732 ppm  
**NICS(1):** -0.6133 ppm  
**NICS(-1):** -3.7489 ppm  
**Isotropic magnetic susceptibility:** -88.9214 cgs-ppm  
**Electronic energy (triplet):** -2073.316784 Hartrees  
**<S<sup>2</sup>> (triplet):** 2.0690

**Cartesian coordinates:**

```
C,0,-1.2471761949,1.1345376806,-0.0436474555
C,0,-1.2471761949,-1.1345376806,-0.0436474555
C,0,1.2471761949,-1.1345376806,-0.0436474555
C,0,1.2471761949,1.1345376806,-0.0436474555
C,0,1.4843686056,0.6955410196,1.3807972643
C,0,1.4843686056,-0.6955410196,1.3807972643
C,0,1.8085030064,-1.4172381592,2.5193577615
C,0,2.127934052,0.6976021457,3.6780132438
C,0,2.127934052,-0.6976021457,3.6780132438
H,0,2.3810834278,1.2320906769,4.5880464077
H,0,2.3810834278,-1.2320906769,4.5880464077
C,0,-1.4843686056,-0.6955410196,1.3807972643
C,0,-1.4843686056,0.6955410196,1.3807972643
C,0,-1.8085030064,-1.4172381592,2.5193577615
C,0,-2.127934052,-0.6976021457,3.6780132438
C,0,-2.127934052,0.6976021457,3.6780132438
H,0,-2.3810834278,-1.2320906769,4.5880464077
H,0,-2.3810834278,1.2320906769,4.5880464077
H,0,1.8124081454,-2.5026802266,2.5198136884
H,0,-1.8124081454,-2.5026802266,2.5198136884
C,0,2.415258048,0.7007565807,-0.9127185287
C,0,2.415258048,-0.7007565807,-0.9127185287
C,0,3.4040274492,1.4156330847,-1.5693475928
C,0,3.4040274492,-1.4156330847,-1.5693475928
C,0,4.4018136176,0.6968334078,-2.2416175212
H,0,3.3966197246,2.5005085432,-1.5841102417
C,0,4.4018136176,-0.6968334078,-2.2416175212
H,0,3.3966197246,-2.5005085432,-1.5841102417
H,0,5.1810907663,1.2330720856,-2.7736417509
H,0,5.1810907663,-1.2330720856,-2.7736417509
C,0,-2.415258048,0.7007565807,-0.9127185287
C,0,-3.4040274492,1.4156330847,-1.5693475928
C,0,-2.415258048,-0.7007565807,-0.9127185287
C,0,-4.4018136176,0.6968334078,-2.2416175212
H,0,-3.3966197246,2.5005085432,-1.5841102417
C,0,-3.4040274492,-1.4156330847,-1.5693475928
C,0,-4.4018136176,-0.6968334078,-2.2416175212
H,0,-5.1810907663,1.2330720856,-2.7736417509
H,0,-3.3966197246,-2.5005085432,-1.5841102417
H,0,-5.1810907663,-1.2330720856,-2.7736417509
C,0,1.8085030064,1.4172381592,2.5193577615H,0,1.8124081454,2.5026802266,2.5198136884
C,0,-1.8085030064,1.4172381592,2.5193577615
H,0,-1.8124081454,2.5026802266,2.5198136884
C,0,0.,1.4838752324,-0.5708964731
C,0,0.,-1.4838752324,-0.5708964731
Cl,0,0.,-1.9854011279,-2.2792929966
Cl,0,0.,1.9854011279,-2.2792929966
Bq,0,0.,0.,-0.219397128
Bq,0,0.,0.,0.780602872
Bq,0,0.,0.,-1.219397128
```

Ar = benzene-1,2-diyl, R<sup>1</sup> = R<sup>2</sup> = CN, localised structure

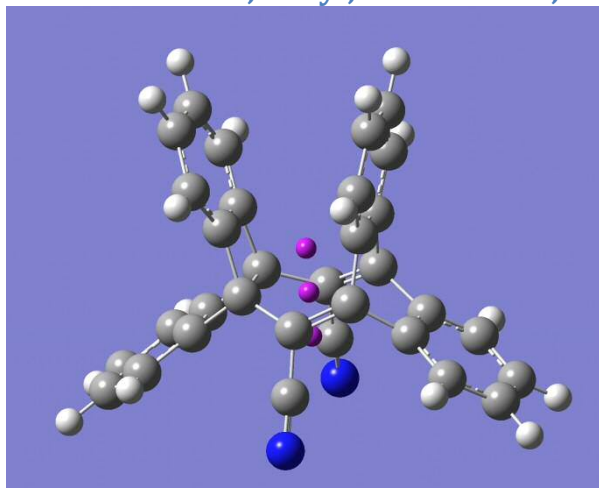

**RB3LYP/6-311+G(d) level:**  
**Allyl-allyl C–C bond length:** 1.73512 Å  
**Distance between terminal allyl C atoms:** 2.43076 Å  
**Sum of bond angles for terminal cyanoallyl C:** 352.320°  
**Electronic energy:** -1338.628064 Hartrees  
**Gibbs free energy:** -1338.307696 Hartrees  
**No imaginary frequencies**  
**Point group:** *C<sub>s</sub>*

**UB3LYP/6-311+G(d)//RB3LYP/6-311+G(d) level:**  
**Electronic energy (singlet):** -1338.628064 Hartrees  
**<S<sup>2</sup>> (singlet):** 0.0000  
**NICS(0):** -1.7178 ppm  
**NICS(1):** 0.4083 ppm  
**NICS(-1):** -2.3044 ppm  
**Isotropic magnetic susceptibility:** cgs-ppm

**Cartesian coordinates:**

```
C,0,0.0395880324,1.3748617161,1.2153819057
C,0,0.0395880324,1.3748617161,-1.2153819057
C,0,0.3543456185,-1.103919528,-0.8675601529
C,0,0.3543456185,-1.103919528,0.8675601529
C,0,-1.0530288871,-1.6754605599,0.6962039882
C,0,-1.0530288871,-1.6754605599,-0.6962039882
C,0,-2.0745067315,-2.2468953657,-1.4344880498
C,0,-3.1282490693,-2.8098958844,0.6994400255
C,0,-3.1282490693,-2.8098958844,-0.6994400255
H,0,-3.9622877793,-3.2629063112,1.2260819994
H,0,-3.9622877793,-3.2629063112,-1.2260819994
C,0,-1.361492918,1.3494931573,-0.698735282
C,0,-1.361492918,1.3494931573,0.698735282
C,0,-2.5525784046,1.3948913268,-1.4099542763
C,0,-3.7542141659,1.4457540607,-0.6970410953
C,0,-3.7542141659,1.4457540607,0.6970410953
H,0,-4.6954780878,1.4857378658,-1.235222858
H,0,-4.6954780878,1.4857378658,1.235222858
H,0,-2.0798268712,-2.2631754303,-2.5194962461
H,0,-2.5513630533,1.3919480996,-2.4949767718
C,0,1.4255896726,-2.1849950946,0.6956547694
C,0,1.4255896726,-2.1849950946,-0.6956547694
C,0,2.203345259,-3.059160954,1.4350611196
C,0,2.203345259,-3.059160954,-1.4350611196
C,0,3.0057956796,-3.9427187649,0.6993345633
H,0,2.2236849971,-3.0582771704,2.5194791091
C,0,3.0057956796,-3.9427187649,-0.6993345633
H,0,2.2236849971,-3.0582771704,-2.5194791091
H,0,3.6503661619,-4.6390862351,1.2259882439
H,0,3.6503661619,-4.6390862351,-1.2259882439
C,0,0.7460895854,2.6172275101,0.7119850877
C,0,1.3482114987,3.6516149336,1.40845542
C,0,0.7460895854,2.6172275101,-0.7119850877
C,0,1.9520787927,4.6947421602,0.6950402984
H,0,1.3673434825,3.6442704538,2.4928938544
C,0,1.3482114987,3.6516149336,-1.40845542
C,0,1.9520787927,4.6947421602,-0.6950402984
H,0,2.4297695935,5.5048032285,1.2358484355
H,0,1.3673434825,3.6442704538,-2.4928938544
H,0,2.4297695935,5.5048032285,-1.2358484355
C,0,-2.0745067315,-2.2468953657,1.4344880498
H,0,-2.0798268712,-2.2631754303,2.5194962461
C,0,-2.5525784046,1.3948913268,1.4099542763
H,0,-2.5513630533,1.3919480996,2.4949767718
C,0,0.7319584851,0.2260952044,1.4659858434
C,0,0.7319584851,0.2260952044,-1.4659858434
C,0,2.0847997408,0.3416749175,1.9294582852
N,0,3.1467405618,0.4181149631,2.3807624962
C,0,2.0847997408,0.3416749175,-1.9294582852
N,0,3.1467405618,0.4181149631,-2.3807624962
Bq,0,0.375297379,0.165679131,0.
Bq,0,-0.61708317,0.042468548,0.
Bq,0,1.367677927,0.288889713,0.
```

Ar = benzene-1,2-diyl, R<sup>1</sup> = R<sup>2</sup> = CN, delocalised structure

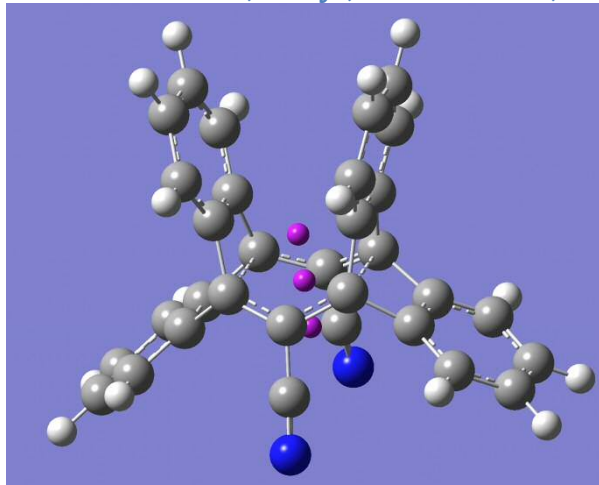

**RB3LYP/6-311+G(d) level:**  
**C<sup>≡</sup>C bond length:** 2.24694 Å  
**Electronic energy:** -1338.621755 Hartrees  
**Gibbs free energy:** -1338.302170 Hartrees  
**Imaginary frequency:** 121.4i cm<sup>-1</sup>  
**Point group:** C<sub>2v</sub>

**UB3LYP/6-311+G(d)//RB3LYP/6-311+G(d) level:**  
**Electronic energy (singlet):** -1338.622864 Hartrees  
**<S<sup>2</sup>> (singlet):** 0.3233  
**NICS(0):** -7.2010 ppm  
**NICS(1):** -1.4026 ppm  
**NICS(-1):** -3.8219 ppm  
**Isotropic magnetic susceptibility:** -138.8721 cgs-ppm  
**Electronic energy (triplet):** -1338.596647 Hartrees  
**<S<sup>2</sup>> (triplet):** 2.0771

**Cartesian coordinates:**

```
C,0,-1.2518849405,1.1234676254,-0.0413656619
C,0,-1.2518849405,-1.1234676254,-0.0413656619
C,0,1.2518849405,-1.1234676254,-0.0413656619
C,0,1.2518849405,1.1234676254,-0.0413656619
C,0,1.5005826775,0.6955942794,1.3810290052
C,0,1.5005826775,-0.6955942794,1.3810290052
C,0,1.8222346328,-1.4182878325,2.5198077492
C,0,2.1406197603,0.697685242,3.6778671162
C,0,2.1406197603,-0.697685242,3.6778671162
H,0,2.3930314327,1.2317715839,4.5881600033
H,0,2.3930314327,-1.2317715839,4.5881600033
C,0,-1.5005826775,-0.6955942794,1.3810290052
C,0,-1.5005826775,0.6955942794,1.3810290052
C,0,-1.8222346328,-1.4182878325,2.5198077492
C,0,-2.1406197603,-0.697685242,3.6778671162
C,0,-2.1406197603,0.697685242,3.6778671162
H,0,-2.3930314327,-1.2317715839,4.5881600033
H,0,-2.3930314327,1.2317715839,4.5881600033
H,0,1.8252913742,-2.5035937596,2.5211624304
H,0,-1.8252913742,-2.5035937596,2.5211624304
C,0,2.406828282,0.7013275648,-0.9346001991
C,0,2.406828282,-0.7013275648,-0.9346001991
C,0,3.3641394251,1.4177738411,-1.6329673615
C,0,3.3641394251,-1.4177738411,-1.6329673615
C,0,4.3315866409,0.6964892311,-2.346820206
H,0,3.3534641933,2.5024030833,-1.654511897
C,0,4.3315866409,-0.6964892311,-2.346820206
H,0,3.3534641933,-2.5024030833,-1.654511897
H,0,5.0837571774,1.2321762076,-2.9164427647
H,0,5.0837571774,-1.2321762076,-2.9164427647
C,0,-2.406828282,0.7013275648,-0.9346001991
C,0,-3.3641394251,1.4177738411,-1.6329673615
C,0,-2.406828282,-0.7013275648,-0.9346001991
C,0,-4.3315866409,0.6964892311,-2.346820206
H,0,-3.3534641933,2.5024030833,-1.654511897
C,0,-3.3641394251,-1.4177738411,-1.6329673615
C,0,-4.3315866409,-0.6964892311,-2.346820206
H,0,-5.0837571774,1.2321762076,-2.9164427647
H,0,-3.3534641933,-2.5024030833,-1.654511897
H,0,-5.0837571774,-1.2321762076,-2.9164427647
C,0,1.8222346328,1.4182878325,2.5198077492
H,0,1.8252913742,2.5035937596,2.5211624304
C,0,-1.8222346328,1.4182878325,2.5198077492
H,0,-1.8252913742,2.5035937596,2.5211624304
C,0,0.,1.4751390995,-0.5851789232
C,0,0.,-1.4751390995,-0.5851789232
C,0,0.,1.8971246258,-1.9647626768
N,0,0.,2.3144128482,-3.041880834
C,0,0.,-1.8971246258,-1.9647626768
N,0,0.,-2.3144128482,-3.041880834
Bq,0,0.,0.,-0.222636749
Bq,0,0.,0.,0.777363251
Bq,0,0.,0.,-1.222636749
```

Ar = benzene-1,2-diyl, R<sup>1</sup> = R<sup>2</sup> = C≡C-H, localised structure

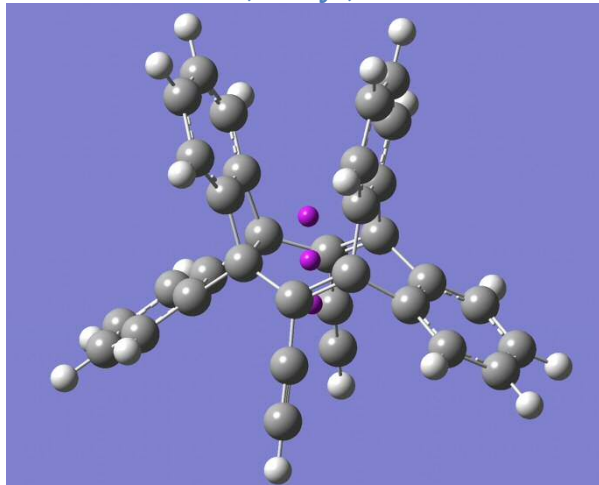

**RB3LYP/6-311+G(d) level:**  
**Allyl-allyl C–C bond length:** 1.75312 Å  
**Distance between terminal allyl C atoms:**  
 2.44627 Å  
**Sum of bond angles for terminal ethynylallyl C:** 351.834°  
**Electronic energy:** -1306.421201 Hartrees  
**Gibbs free energy:** -1306.080894 Hartrees  
**No imaginary frequencies**  
**Point group:** *C<sub>s</sub>*

**UB3LYP/6-311+G(d)//RB3LYP/6-311+G(d) level:**  
**Electronic energy (singlet):** -1306.421201 Hartrees  
**<S<sup>2</sup>> (singlet):** 0.0000  
**NICS(0):** -1.1161 ppm  
**NICS(1):** 1.0153 ppm  
**NICS(-1):** -1.8121 ppm  
**Isotropic magnetic susceptibility:** -106.1582 cgs-ppm

**Cartesian coordinates:**

```
C,0,0.0590457854,1.3759013944,1.2242492371
C,0,0.0590457854,1.3759013944,-1.2242492371
C,0,0.3830663923,-1.090388634,-0.8648618307
C,0,0.3830663923,-1.090388634,0.8648618307
C,0,-1.0273300076,-1.6586179852,0.6963637656
C,0,-1.0273300076,-1.6586179852,-0.6963637656
C,0,-2.0493851022,-2.2301303204,-1.4337442422
C,0,-3.1035382164,-2.793802388,0.6993537213
C,0,-3.1035382164,-2.793802388,-0.6993537213
H,0,-3.9383403259,-3.2455756391,1.2262601936
H,0,-3.9383403259,-3.2455756391,-1.2262601936
C,0,-1.3392970672,1.3390697606,-0.6992984963
C,0,-1.3392970672,1.3390697606,0.6992984963
C,0,-2.5322561637,1.3857379083,-1.4082715789
C,0,-3.735131347,1.4333486711,-0.6970206625
C,0,-3.735131347,1.4333486711,0.6970206625
H,0,-4.6765032113,1.4716023898,-1.2357216012
H,0,-4.6765032113,1.4716023898,1.2357216012
H,0,-2.0556788753,-2.2447912243,-2.5189636919
H,0,-2.5305860416,1.3848125928,-2.4936075566
C,0,1.4329636241,-2.1929742317,0.6955229831
C,0,1.4329636241,-2.1929742317,-0.6955229831
C,0,2.1844290407,-3.0916696787,1.4334407003
C,0,2.1844290407,-3.0916696787,-1.4334407003
C,0,2.9618647475,-3.999101743,0.699598258
H,0,2.1969476313,-3.0958735575,2.5182291092
C,0,2.9618647475,-3.999101743,-0.699598258
H,0,2.1969476313,-3.0958735575,-2.5182291092
H,0,3.5806114804,-4.718955907,1.2265466134
H,0,3.5806114804,-4.718955907,-1.2265466134
C,0,0.7456769402,2.6255089471,0.712153722
C,0,1.3242478516,3.675814253,1.4065242837
C,0,0.7456769402,2.6255089471,-0.712153722
C,0,1.9048691451,4.7335750115,0.695343492
H,0,1.3367738951,3.6708473376,2.4913157966
C,0,1.3242478516,3.675814253,-1.4065242837
C,0,1.9048691451,4.7335750115,-0.695343492
H,0,2.3584926591,5.5578020637,1.2364999721
H,0,1.3367738951,3.6708473376,-2.4913157966
H,0,2.3584926591,5.5578020637,-1.2364999721
C,0,-2.0493851022,-2.2301303204,1.4337442422
H,0,-2.0556788753,-2.2447912243,2.5189636919
C,0,-2.5322561637,1.3857379083,1.4082715789
H,0,-2.5305860416,1.3848125928,2.4936075566
C,0,0.7765710529,0.238191065,1.4680254706
C,0,0.7765710529,0.238191065,-1.4680254706
C,0,2.1268877656,0.348104884,1.9166617921
C,0,2.1268877656,0.348104884,-1.9166617921
C,0,3.2480685778,0.4190038202,2.3548953315
H,0,4.2466742586,0.486601873,2.7155835869
C,0,3.2480685778,0.4190038202,-2.3548953315
H,0,4.2466742586,0.486601873,-2.7155835869
Bq,0,0.406227744,0.174567942,0.
Bq,0,-0.585625586,0.047182808,0.
Bq,0,1.398081073,0.301953076,0.
```



Ar = benzene-1,2-diyl, R<sup>1</sup> = R<sup>2</sup> = C≡C-H, delocalised structure

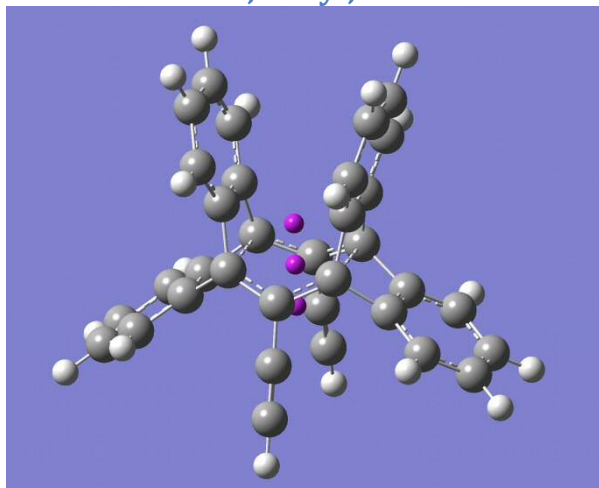

**RB3LYP/6-311+G(d) level:**  
**C≡C bond length:** 2.25625 Å  
**Electronic energy:** -1306.413482 Hartrees  
**Gibbs free energy:** -1306.074109 Hartrees  
**Imaginary frequency:** 156.9*i* cm<sup>-1</sup>  
**Point group:** C<sub>2v</sub>

**UB3LYP/6-311+G(d)//RB3LYP/6-311+G(d) level:**  
**Electronic energy (singlet):** -1306.414974 Hartrees  
**<S<sup>2</sup>> (singlet):** 0.4396  
**NICS(0):** -6.7267 ppm  
**NICS(1):** -0.7125 ppm  
**NICS(-1):** -4.2448 ppm  
**Isotropic magnetic susceptibility:** -138.6201 cgs-ppm  
**Electronic energy (triplet):** -1306.389674 Hartrees  
**<S<sup>2</sup>> (triplet):** 2.0833

**Cartesian coordinates:**

```
C,0,-1.2448176116,1.1281272467,-0.0495048128
C,0,-1.2448176116,-1.1281272467,-0.0495048128
C,0,1.2448176116,-1.1281272467,-0.0495048128
C,0,1.2448176116,1.1281272467,-0.0495048128
C,0,1.4867327172,0.6958038521,1.3735527864
C,0,1.4867327172,-0.6958038521,1.3735527864
C,0,1.8092534778,-1.417101613,2.5132705019
C,0,2.1269261637,0.6976432929,3.6724318547
C,0,2.1269261637,-0.6976432929,3.6724318547
H,0,2.3778818108,1.2321024349,4.5831927624
H,0,2.3778818108,-1.2321024349,4.5831927624
C,0,-1.4867327172,-0.6958038521,1.3735527864
C,0,-1.4867327172,0.6958038521,1.3735527864
C,0,-1.8092534778,-1.417101613,2.5132705019
C,0,-2.1269261637,-0.6976432929,3.6724318547
C,0,-2.1269261637,0.6976432929,3.6724318547
H,0,-2.3778818108,-1.2321024349,4.5831927624
H,0,-2.3778818108,1.2321024349,4.5831927624
H,0,1.8119517179,-2.5026626696,2.5144118495
H,0,-1.8119517179,-2.5026626696,2.5144118495
C,0,2.4131426286,0.7011687883,-0.9223065625
C,0,2.4131426286,-0.7011687883,-0.9223065625
C,0,3.3922791262,1.4159896206,-1.5930826528
C,0,3.3922791262,-1.4159896206,-1.5930826528
C,0,4.3807792167,0.696834862,-2.2795690182
H,0,3.3850319686,2.5010010507,-1.6075998024
C,0,4.3807792167,-0.696834862,-2.2795690182
H,0,3.3850319686,-2.5010010507,-1.6075998024
H,0,5.1534771549,1.2328142137,-2.8216959651
H,0,5.1534771549,-1.2328142137,-2.8216959651
C,0,-2.4131426286,0.7011687883,-0.9223065625
C,0,-3.3922791262,1.4159896206,-1.5930826528
C,0,-2.4131426286,-0.7011687883,-0.9223065625
C,0,-4.3807792167,0.696834862,-2.2795690182
H,0,-3.3850319686,2.5010010507,-1.6075998024
C,0,-3.3922791262,-1.4159896206,-1.5930826528
C,0,-4.3807792167,-0.696834862,-2.2795690182
H,0,-5.1534771549,1.2328142137,-2.8216959651
H,0,-3.3850319686,-2.5010010507,-1.6075998024
H,0,-5.1534771549,-1.2328142137,-2.8216959651
C,0,1.8092534778,1.417101613,2.5132705019
H,0,1.8119517179,2.5026626696,2.5144118495
C,0,-1.8092534778,1.417101613,2.5132705019
H,0,-1.8119517179,2.5026626696,2.5144118495
C,0,0.,1.4831451209,-0.6130272904
C,0,0.,-1.4831451209,-0.6130272904
C,0,0.,1.8993437679,-1.9876736583
C,0,0.,-1.8993437679,-1.9876736583
C,0,0.,-2.3124586706,-3.118830285
H,0,0.,-2.6501094695,-4.1277307257
C,0,0.,2.3124586706,-3.118830285
H,0,0.,2.6501094695,-4.1277307257
Bq,0,0.,0.,-0.237345639
Bq,0,0.,0.,0.762654361
Bq,0,0.,0.,-1.237345639
```

Ar = benzene-1,2-diyl, R<sup>1</sup> = -COCH=CHCO-, R<sup>2</sup> = -, localised structure

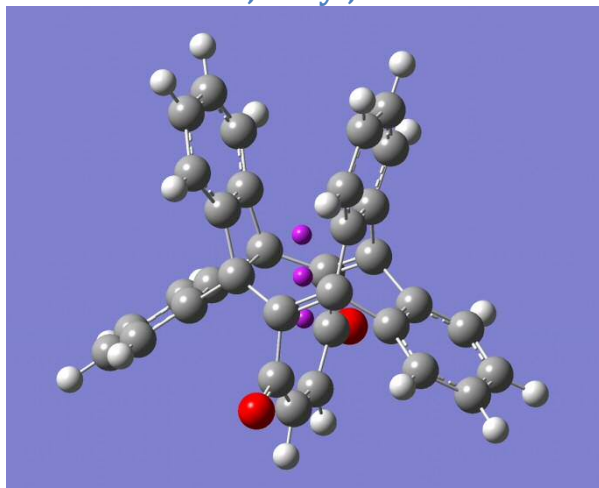

**RB3LYP/6-311+G(d) level:**  
**Allyl-allyl C–C bond length:** 1.74459 Å  
**Distance between terminal allyl C atoms:** 2.43337 Å  
**Sum of bond angles for terminal allyl C:** 350.728°  
**Electronic energy:** -1457.013067 Hartrees  
**Gibbs free energy:** -1456.659010 Hartrees  
**No imaginary frequencies**  
**Point group:** *C<sub>s</sub>*

**UB3LYP/6-311+G(d)//RB3LYP/6-311+G(d) level:**  
**Electronic energy (singlet):** -1457.013067 Hartrees  
**<S<sup>2</sup>> (singlet):**  
**NICS(0):** -1.3477 ppm  
**NICS(1):** 0.6038 ppm  
**NICS(-1):** 0.4235 ppm  
**Isotropic magnetic susceptibility:** -153.3849 cgs-ppm

**Cartesian coordinates:**

C,0,-0.6873963687,1.1490451852,1.2166848148  
C,0,-0.6873963687,1.1490451852,-1.2166848148  
C,0,0.3657742841,-1.1116429522,-0.8722929095  
C,0,0.3657742841,-1.1116429522,0.8722929095  
C,0,-0.8184019801,-2.0600757949,0.6956390592  
C,0,-0.8184019801,-2.0600757949,-0.6956390592  
C,0,-1.6383624873,-2.8948685195,-1.4346220487  
C,0,-2.4884617832,-3.7338613549,0.6996373548  
C,0,-2.4884617832,-3.7338613549,-0.6996373548  
H,0,-3.1610453013,-4.4036886311,1.2262164124  
H,0,-3.1610453013,-4.4036886311,-1.2262164124  
C,0,-2.0273231348,0.7186634362,-0.7014226647  
C,0,-2.0273231348,0.7186634362,0.7014226647  
C,0,-3.1864707616,0.4327134247,-1.4088178643  
C,0,-4.354652709,0.1410268262,-0.6968363628  
C,0,-4.354652709,0.1410268262,0.6968363628  
H,0,-5.2691618394,-0.0852126444,-1.2355989939  
H,0,-5.2691618394,-0.0852126444,1.2355989939  
H,0,-1.6405976125,-2.9082335543,-2.5196209451  
H,0,-3.1859875842,0.4340055741,-2.4940594536  
C,0,1.6986282307,-1.8483162397,0.6965597985  
C,0,1.6986282307,-1.8483162397,-0.6965597985  
C,0,2.705300994,-2.4451853821,1.4350908294  
C,0,2.705300994,-2.4451853821,-1.4350908294  
C,0,3.7372999754,-3.0491167691,0.6989500329  
H,0,2.7225764453,-2.4382680027,2.5198851916  
C,0,3.7372999754,-3.0491167691,-0.6989500329  
H,0,2.7225764453,-2.4382680027,-2.5198851916  
H,0,4.5586602369,-3.5242290338,1.2259791053  
H,0,4.5586602369,-3.5242290338,-1.2259791053  
C,0,-0.3971147651,2.5509689525,0.7111162118  
C,0,-0.1426239735,3.7207548446,1.4088183979  
C,0,-0.3971147651,2.5509689525,-0.7111162118  
C,0,0.1157313507,4.8997872672,0.6951979798  
H,0,-0.1296344954,3.7198902553,2.4937967534  
C,0,-0.1426239735,3.7207548446,-1.4088183979  
C,0,0.1157313507,4.8997872672,-0.6951979798  
H,0,0.3171422755,5.8189388163,1.2357666698  
H,0,-0.1296344954,3.7198902553,-2.4937967534  
H,0,0.3171422755,5.8189388163,-1.2357666698  
C,0,-1.6383624873,-2.8948685195,1.4346220487  
H,0,-1.6405976125,-2.9082335543,2.5196209451  
C,0,-3.1864707616,0.4327134247,1.4088178643  
H,0,-3.1859875842,0.4340055741,2.4940594536  
C,0,0.3387218631,0.2844407401,1.3970423319  
C,0,0.3387218631,0.2844407401,-1.3970423319  
C,0,1.7005313559,0.8625039704,1.7162401081  
O,0,2.0319873086,0.9836116948,2.8823324783  
C,0,1.7005313559,0.8625039704,-1.7162401081  
O,0,2.0319873086,0.9836116948,-2.8823324783  
C,0,2.678770856,1.2986482037,0.6728671607  
H,0,3.5699914776,1.6949791018,1.1544189745  
C,0,2.678770856,1.2986482037,-0.6728671607  
H,0,3.5699914776,1.6949791018,-1.1544189745  
Bq,0,0.005699926,0.107280991,0.  
Bq,0,-0.902398691,-0.311475385,0.  
Bq,0,0.913798543,0.526037367,0.

Ar = benzene-1,2-diyl, R<sup>1</sup> = -COCH=CHCO-, R<sup>2</sup> = -, delocalised structure

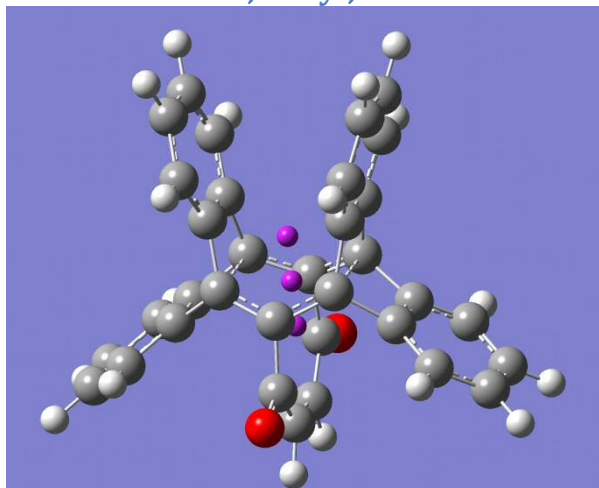

**RB3LYP/6-311+G(d) level:**  
**C<sup>∞</sup>C bond length:** 2.25205 Å  
**Electronic energy:** -1457.009247 Hartrees  
**Gibbs free energy:** -1456.656807 Hartrees  
**No imaginary frequencies**  
**Point group:** C<sub>2v</sub>

**UB3LYP/6-311+G(d)//RB3LYP/6-311+G(d) level:**  
**Electronic energy (singlet):** -1457.010276 Hartrees  
**<S<sup>2</sup>> (singlet):** 0.3005  
**NICS(0):** -6.4489 ppm  
**NICS(1):** -1.5960 ppm  
**NICS(-1):** -2.2645 ppm  
**Isotropic magnetic susceptibility:** -14.1726 cgs-ppm  
**Electronic energy (triplet):** -1456.983906 Hartrees  
**<S<sup>2</sup>> (triplet):** 2.0625

**Cartesian coordinates:**

```
C,0,-1.1260251429,-1.2474864628,0.1644606552
C,0,1.1260251429,-1.2474864628,0.1644606552
C,0,1.1260251429,1.2474864628,0.1644606552
C,0,-1.1260251429,1.2474864628,0.1644606552
C,0,-0.6966549449,1.499821913,1.5884010854
C,0,0.6966549449,1.499821913,1.5884010854
C,0,1.4175684502,1.8225988042,2.7280813067
C,0,-0.6977189435,2.14037392,3.886679228
C,0,0.6977189435,2.14037392,3.886679228
H,0,-1.2320631197,2.3921326478,4.7971976435
H,0,1.2320631197,2.3921326478,4.7971976435
C,0,0.6966549449,-1.499821913,1.5884010854
C,0,-0.6966549449,-1.499821913,1.5884010854
C,0,1.4175684502,-1.8225988042,2.7280813067
C,0,0.6977189435,-2.14037392,3.886679228
C,0,-0.6977189435,-2.14037392,3.886679228
H,0,1.2320631197,-2.3921326478,4.7971976435
H,0,-1.2320631197,-2.3921326478,4.7971976435
H,0,2.5029877524,1.8252370892,2.729088947
H,0,2.5029877524,-1.8252370892,2.729088947
C,0,-0.7013396051,2.4121746584,-0.7168655795
C,0,0.7013396051,2.4121746584,-0.7168655795
C,0,-1.4178781792,3.3648201671,-1.422380522
C,0,1.4178781792,3.3648201671,-1.422380522
C,0,-0.6964073195,4.3304417509,-2.141836346
H,0,-2.502931903,3.3545175037,-1.4409360062
C,0,0.6964073195,4.3304417509,-2.141836346
H,0,2.502931903,3.3545175037,-1.4409360062
H,0,-1.2322130171,5.0833309337,-2.7108824483
H,0,1.2322130171,5.0833309337,-2.7108824483
C,0,-0.7013396051,-2.4121746584,-0.7168655795
C,0,-1.4178781792,-3.3648201671,-1.422380522
C,0,0.7013396051,-2.4121746584,-0.7168655795
C,0,-0.6964073195,-4.3304417509,-2.141836346
H,0,-2.502931903,-3.3545175037,-1.4409360062
C,0,1.4178781792,-3.3648201671,-1.422380522
C,0,0.6964073195,-4.3304417509,-2.141836346
H,0,-1.2322130171,-5.0833309337,-2.7108824483
H,0,2.502931903,-3.3545175037,-1.4409360062
H,0,1.2322130171,-5.0833309337,-2.7108824483
C,0,-1.4175684502,1.8225988042,2.7280813067
H,0,-2.5029877524,1.8252370892,2.729088947
C,0,-1.4175684502,-1.8225988042,2.7280813067
H,0,-2.5029877524,-1.8252370892,2.729088947
C,0,-1.4182974134,0,-0.3969133525
C,0,1.4182974134,0,-0.3969133525
C,0,-1.7246192069,0,-1.8853445624
O,0,-2.8872801063,0,-2.2467801194
C,0,1.7246192069,0,-1.8853445624
O,0,2.8872801063,0,-2.2467801194
C,0,-0.6730255243,0,-2.9481439762
H,0,-1.1505632884,0,-3.9254890815
C,0,0.6730255243,0,-2.9481439762
H,0,1.1505632884,0,-3.9254890815
Bq,0,0,0,-0.022664014
Bq,0,0,0,0.977335986
Bq,0,0,0,-1.022664014
```

Ar = benzene-1,2-diyl, R<sup>1</sup> = -COCH=CHCO-, R<sup>2</sup> = -, localised  $\rightleftharpoons$  delocalised TS

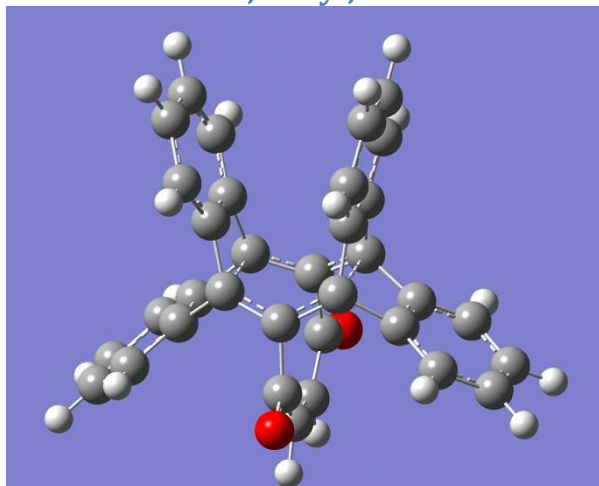

**RB3LYP/6-311+G(d) level:**  
**C<sup>∞</sup>C bond lengths:** 2.14465 Å, 2.32733 Å  
**Electronic energy:** -1457.009230 Hartrees  
**Gibbs free energy:** -1456.656258 Hartrees  
**Imaginary frequency:** 94.7i cm<sup>-1</sup>  
**Point group:** C<sub>s</sub>

**UB3LYP/6-311+G(d)//RB3LYP/6-311+G(d) level:**  
**Electronic energy (singlet):** -1457.010276 Hartrees  
**<S<sup>2</sup>> (singlet):** 0.3005  
**Electronic energy (triplet):** -1456.979787 Hartrees  
**<S<sup>2</sup>> (triplet):** 2.0607

**Cartesian coordinates:**

```
C,0,-0.6718619685,1.0604155667,1.1533257625
C,0,-0.6718619685,1.0604155667,-1.1533257625
C,0,0.403849078,-1.1896359636,-1.08976545
C,0,0.403849078,-1.1896359636,1.08976545
C,0,-0.7716334997,-2.0521902426,0.6957638063
C,0,-0.7716334997,-2.0521902426,-0.6957638063
C,0,-1.6457345898,-2.8475744918,-1.4205016412
C,0,-2.5405549407,-3.6475277304,0.6980296413
C,0,-2.5405549407,-3.6475277304,-0.6980296413
H,0,-3.2439600735,-4.2792534374,1.231049271
H,0,-3.2439600735,-4.2792534374,-1.231049271
C,0,-2.0513830989,0.659767518,-0.6975588148
C,0,-2.0513830989,0.659767518,0.6975588148
C,0,-3.2179051387,0.4407631551,-1.4151212523
C,0,-4.3977832365,0.2098683588,-0.6974891359
C,0,-4.3977832365,0.2098683588,0.6974891359
H,0,-5.3247360099,0.031078875,-1.2329625769
H,0,-5.3247360099,0.031078875,1.2329625769
H,0,-1.6463012679,-2.8513469398,-2.5058805174
H,0,-3.2192089555,0.4434096036,-2.5005606383
C,0,1.7092506445,-1.8673383761,0.6998633489
C,0,1.7092506445,-1.8673383761,-0.6998633489
C,0,2.7529558584,-2.4233125057,1.4209487204
C,0,2.7529558584,-2.4233125057,-1.4209487204
C,0,3.8162295101,-2.9853525107,0.6968128737
H,0,2.7669871758,-2.4049306741,2.5058869145
C,0,3.8162295101,-2.9853525107,-0.6968128737
H,0,2.7669871758,-2.4049306741,-2.5058869145
H,0,4.6550994387,-3.4197915875,1.2309777184
H,0,4.6550994387,-3.4197915875,-1.2309777184
C,0,-0.3817359101,2.4837480186,0.7029483403
C,0,-0.1527240659,3.6495193083,1.4153917515
C,0,-0.3817359101,2.4837480186,-0.7029483403
C,0,0.0825537139,4.8315453661,0.6960577891
H,0,-0.1332114984,3.6480637927,2.5005217668
C,0,-0.1527240659,3.6495193083,-1.4153917515
C,0,0.0825537139,4.8315453661,-0.6960577891
H,0,0.2715563999,5.7554191305,1.233149741
H,0,-0.1332114984,3.6480637927,-2.5005217668
H,0,0.2715563999,5.7554191305,-1.233149741
C,0,-1.6457345898,-2.8475744918,1.4205016412
H,0,-1.6463012679,-2.8513469398,2.5058805174
C,0,-3.2179051387,0.4407631551,1.4151212523
H,0,-3.2192089555,0.4434096036,2.5005606383
C,0,0.3701829329,0.1832731341,1.4170134232
C,0,0.3701829329,0.1832731341,-1.4170134232
C,0,1.717826146,0.8142698938,1.7239716895
O,0,2.0562589438,0.942765419,2.8864659136
C,0,1.717826146,0.8142698938,-1.7239716895
O,0,2.0562589438,0.942765419,-2.8864659136
C,0,2.6668380402,1.2944713314,0.673023324
H,0,3.5430278915,1.7271554549,1.1508539174
C,0,2.6668380402,1.2944713314,-0.673023324
H,0,3.5430278915,1.7271554549,-1.1508539174
```

Ar = benzene-1,2-diyl, R<sup>1</sup> = -NHCONH-, R<sup>2</sup> = -, localised structure

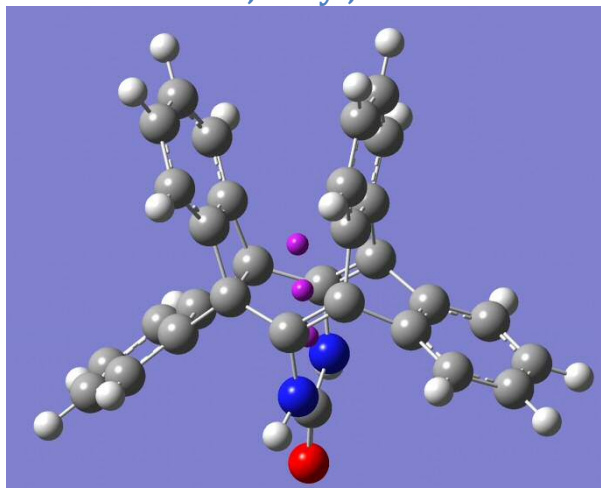

**RB3LYP/6-311+G(d) level:**  
**Allyl-allyl C–C bond length:** 1.74720 Å  
**Distance between terminal allyl C atoms:** 2.41841 Å  
**Sum of bond angles for terminal allyl C:** 348.979°  
**Electronic energy:** -1376.997905 Hartrees  
**Gibbs free energy:** -1376.650074 Hartrees  
**No imaginary frequencies**  
**Point group:** *C<sub>s</sub>*

**UB3LYP/6-311+G(d)//RB3LYP/6-311+G(d) level:**  
**Electronic energy (singlet):** -1376.997905 Hartrees  
**<S<sup>2</sup>> (singlet):** 0.0000  
**NICS(0):** -4.0101 ppm  
**NICS(1):** -0.1161 ppm  
**NICS(-1):** -3.7916 ppm  
**Isotropic magnetic susceptibility:** -99.6966 cgs-ppm

**Cartesian coordinates:**

```
C,0,1.3480893182,1.2092062848,0.0467577306
C,0,1.3480893182,-1.2092062848,0.0467577306
C,0,-1.1529725358,-0.8736002674,0.0075382412
C,0,-1.1529725358,0.8736002674,0.0075382412
C,0,-1.4561892275,0.6965395319,-1.4764232276
C,0,-1.4561892275,-0.6965395319,-1.4764232276
C,0,-1.8431500822,-1.4334367528,-2.5826391347
C,0,-2.2185964063,0.6994732878,-3.716942909
C,0,-2.2185964063,-0.6994732878,-3.716942909
H,0,-2.523575526,1.2262595482,-4.6157297223
H,0,-2.523575526,-1.2262595482,-4.6157297223
C,0,1.527175585,-0.7067409018,-1.3594233288
C,0,1.527175585,0.7067409018,-1.3594233288
C,0,1.7870795381,-1.407401584,-2.5269851254
C,0,2.037837017,-0.6961105514,-3.7058514463
C,0,2.037837017,0.6961105514,-3.7058514463
H,0,2.2405923889,-1.2357201304,-4.6253518586
H,0,2.2405923889,1.2357201304,-4.6253518586
H,0,-1.8596642951,-2.5185900072,-2.5904200425
H,0,1.7961041492,-2.4926700736,-2.5267714465
C,0,-2.4160819187,0.6960496688,0.8561371676
C,0,-2.4160819187,-0.6960496688,0.8561371676
C,0,-3.4194876891,1.4334978794,1.4603485869
C,0,-3.4194876891,-1.4334978794,1.4603485869
C,0,-4.4375351949,0.6991870487,2.0869099618
H,0,-3.4306669312,2.5189840203,1.4689231063
C,0,-4.4375351949,-0.6991870487,2.0869099618
H,0,-3.4306669312,-2.5189840203,1.4689231063
H,0,-5.2441956996,1.2260262963,2.5866531565
H,0,-5.2441956996,-1.2260262963,2.5866531565
C,0,2.5163977403,0.7074106725,0.8704408747
C,0,3.5135112747,1.4079457163,1.5307649539
C,0,2.5163977403,-0.7074106725,0.8704408747
C,0,4.5169731048,0.6961696336,2.198104589
H,0,3.5106528104,2.4932098113,1.5386424972
C,0,3.5135112747,-1.4079457163,1.5307649539
C,0,4.5169731048,-0.6961696336,2.198104589
H,0,5.3004339171,1.2359470229,2.7201728029
H,0,3.5106528104,-2.4932098113,1.5386424972
H,0,5.3004339171,-1.2359470229,2.7201728029
C,0,-1.8431500822,1.4334367528,-2.5826391347
H,0,-1.8596642951,2.5185900072,-2.5904200425
C,0,1.7870795381,1.407401584,-2.5269851254
H,0,1.7961041492,2.4926700736,-2.5267714465
C,0,0.1319938263,1.3066268746,0.6394155518
C,0,0.1319938263,-1.3066268746,0.6394155518
C,0,-0.0324975185,0.,2.7818222495
O,0,-0.2479057277,0.,3.9824547088
N,0,0.1058083461,1.1945201286,2.0775685838
H,0,-0.1903317682,1.9859307177,2.6300760358
N,0,0.1058083461,-1.1945201286,2.0775685838
H,0,-0.1903317682,-1.9859307177,2.6300760358
Bq,0,0.10903687,0.,0.231237175
Bq,0,0.130948177,0.,-0.768522744
Bq,0,0.087125563,0.,1.230997093
```

Ar = benzene-1,2-diyl, R<sup>1</sup> = -NHCONH-, R<sup>2</sup> = -, delocalised structure

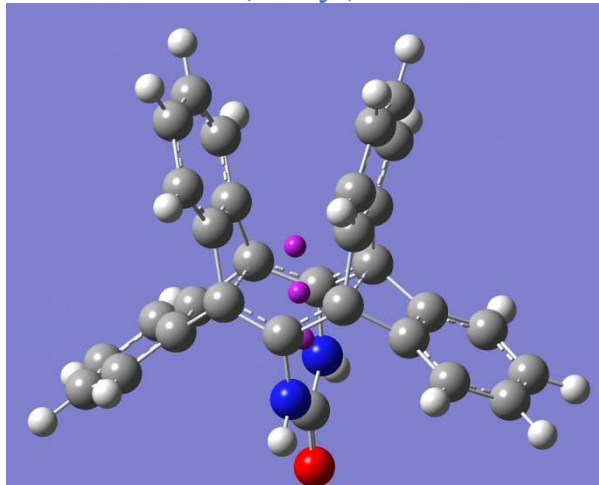

**RB3LYP/6-311+G(d) level:**  
**C<sup>∞</sup>C bond length:** 2.23683 Å  
**Electronic energy:** -1376.993923 Hartrees  
**Gibbs free energy:** -1376.647414 Hartrees  
**Imaginary frequency:** 49.7i cm<sup>-1</sup>  
**Point group:** C<sub>2v</sub>

**UB3LYP/6-311+G(d)//RB3LYP/6-311+G(d) level:**  
**Electronic energy (singlet):** -1376.994387 Hartrees  
**<S<sup>2</sup>> (singlet):** 0.1850  
**NICS(0):** -10.7371 ppm  
**NICS(1):** -2.0451 ppm  
**NICS(-1):** -6.1570 ppm  
**Isotropic magnetic susceptibility:** -118.2847 cgs-ppm  
**Electronic energy (triplet):** -1376.962508 Hartrees  
**<S<sup>2</sup>> (triplet):** 2.0680

**Cartesian coordinates:**

```
C,0,1.2499613848,1.1184174737,0.0158826407
C,0,1.2499613848,-1.1184174737,0.0158826407
C,0,-1.2499613848,-1.1184174737,0.0158826407
C,0,-1.2499613848,1.1184174737,0.0158826407
C,0,-1.4821346796,0.6995619746,-1.417399934
C,0,-1.4821346796,-0.6995619746,-1.417399934
C,0,-1.8078894134,-1.4165275689,-2.5578884933
C,0,-2.1248883793,0.6973770461,-3.7173142177
C,0,-2.1248883793,-0.6973770461,-3.7173142177
H,0,-2.3789424134,1.2321906418,-4.6269114537
H,0,-2.3789424134,-1.2321906418,-4.6269114537
C,0,1.4821346796,-0.6995619746,-1.417399934
C,0,1.4821346796,0.6995619746,-1.417399934
C,0,1.8078894134,-1.4165275689,-2.5578884933
C,0,2.1248883793,-0.6973770461,-3.7173142177
C,0,2.1248883793,0.6973770461,-3.7173142177
H,0,2.3789424134,-1.2321906418,-4.6269114537
H,0,2.3789424134,1.2321906418,-4.6269114537
H,0,-1.817096063,-2.5020136067,-2.5588159928
H,0,1.817096063,-2.5020136067,-2.5588159928
C,0,-2.4422818527,0.6988096747,0.8585632488
C,0,-2.4422818527,-0.6988096747,0.8585632488
C,0,-3.4393280996,1.4171554953,1.4992432066
C,0,-3.4393280996,-1.4171554953,1.4992432066
C,0,-4.4474305097,0.6974056275,2.1539267256
H,0,-3.4379198478,2.5028461945,1.5081562825
C,0,-4.4474305097,-0.6974056275,2.1539267256
H,0,-3.4379198478,-2.5028461945,1.5081562825
H,0,-5.237483994,1.2322016631,2.6712056872
H,0,-5.237483994,-1.2322016631,2.6712056872
C,0,2.4422818527,0.6988096747,0.8585632488
C,0,3.4393280996,1.4171554953,1.4992432066
C,0,2.4422818527,-0.6988096747,0.8585632488
C,0,4.4474305097,0.6974056275,2.1539267256
H,0,3.4379198478,2.5028461945,1.5081562825
C,0,3.4393280996,-1.4171554953,1.4992432066
C,0,4.4474305097,-0.6974056275,2.1539267256
H,0,5.237483994,1.2322016631,2.6712056872
H,0,3.4379198478,-2.5028461945,1.5081562825
H,0,5.237483994,-1.2322016631,2.6712056872
C,0,-1.8078894134,1.4165275689,-2.5578884933
H,0,-1.817096063,2.5020136067,-2.5588159928
C,0,1.8078894134,1.4165275689,-2.5578884933
H,0,1.817096063,2.5020136067,-2.5588159928
C,0,0.,1.3223893687,0.6211370705
C,0,0.,-1.3223893687,0.6211370705
C,0,0.,0.,2.7721374089
O,0,0.,0.,3.9939513719
N,0,0.,1.1913938641,2.0588015279
H,0,0.,2.0052759965,2.6537755784
N,0,0.,-1.1913938641,2.0588015279
H,0,0.,-2.0052759965,2.6537755784
Bq,0,0.,0.,0.217634117
Bq,0,0.,0.,-0.782365883
Bq,0,0.,0.,1.217634117
```

Ar = benzene-1,2-diyl, R<sup>1</sup> = naphthalene-1,8-diyl, R<sup>2</sup> = -, localised structure

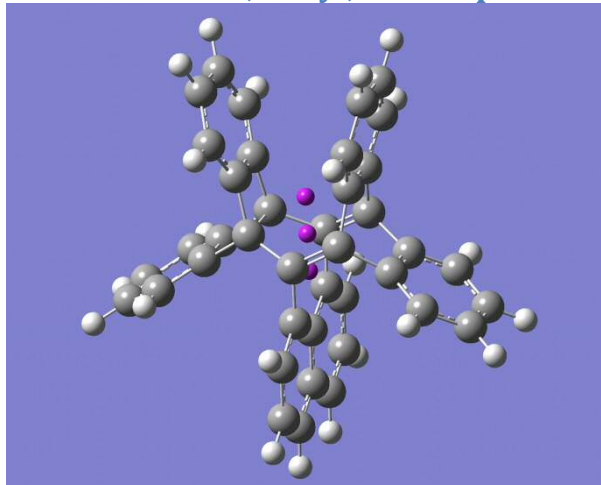

**RB3LYP/6-311+G(d) level:**  
**Allyl-allyl C–C bond length:** 1.73410 Å  
**Distance between terminal allyl C atoms:** 2.43140 Å  
**Sum of bond angles for terminal allyl C:** 348.982°  
**Electronic energy:** -1537.655178 Hartrees  
**Gibbs free energy:** -1537.227713 Hartrees  
**No imaginary frequencies**  
**Point group:** C<sub>s</sub>

**UB3LYP/6-311+G(d)//RB3LYP/6-311+G(d) level:**  
**Electronic energy (singlet):** -1537.655178 Hartrees  
**<S<sup>2</sup>> (singlet):** 0.0000  
**NICS(0):** -3.5382 ppm  
**NICS(1):** 0.5747 ppm  
**NICS(-1):** 0.3569 ppm  
**Isotropic magnetic susceptibility:** -86.6448 cgs-ppm

**Cartesian coordinates:**

```
C,0,0.5598587175,-1.3317958695,1.2156991318
C,0,0.5598587175,-1.3317958695,-1.2156991318
C,0,-0.0398600295,-0.1187727285,-1.3211233195
C,0,0.5934384893,1.1589685683,-0.8670517716
C,0,0.5934384893,1.1589685683,0.8670517716
C,0,-0.0398600295,-0.1187727285,1.3211233195
C,0,-1.5442020734,-0.0685280394,-1.272916156
C,0,-2.2193244355,-0.0324513631,0.
C,0,-2.2747746974,-0.0563693066,-2.440060946
C,0,-1.5442020734,-0.0685280394,1.272916156
C,0,-3.652135456,0.0133701276,0.
C,0,-3.6858205885,-0.0064881329,-2.4272226906
H,0,-1.7491879081,-0.0881663264,-3.3893269346
C,0,-2.2747746974,-0.0563693066,2.440060946
C,0,-4.357006419,0.0298472191,1.2324772334
C,0,-4.357006419,0.0298472191,-1.2324772334
H,0,-4.2316400048,0.0013323083,-3.365325269
C,0,-3.6858205885,-0.0064881329,2.4272226906
H,0,-1.7491879081,-0.0881663264,3.3893269346
H,0,-5.4422231506,0.0672807197,1.210608658
H,0,-5.4422231506,0.0672807197,-1.210608658
H,0,-4.2316400048,0.0013323083,3.365325269
C,0,2.0807839138,1.4622680306,0.6961358066
C,0,2.0807839138,1.4622680306,-0.6961358066
C,0,3.1852176885,1.8524307427,-1.4335398164
C,0,4.3189597433,2.230137797,0.6995242856
C,0,4.3189597433,2.230137797,-0.6995242856
H,0,5.2174798226,2.536578213,1.2262161672
H,0,5.2174798226,2.536578213,-1.2262161672
C,0,1.9643702477,-1.5127451196,-0.7056490056
C,0,1.9643702477,-1.5127451196,0.7056490056
C,0,3.1315398955,-1.7761041423,-1.4067911028
C,0,4.3103371624,-2.0297044553,-0.6962505536
C,0,4.3103371624,-2.0297044553,0.6962505536
H,0,5.2296298214,-2.2338865828,-1.2360238761
H,0,5.2296298214,-2.2338865828,1.2360238761
H,0,3.192266202,1.8693488301,-2.5187437512
H,0,3.1310647136,-1.7845495764,-2.4922729972
C,0,-0.2381041748,2.4360119345,0.6960843795
C,0,-0.2381041748,2.4360119345,-0.6960843795
C,0,-0.8244826187,3.449908118,1.4336053223
C,0,-0.8244826187,3.449908118,-1.4336053223
C,0,-1.4310282825,4.4802261882,0.6993376746
H,0,-0.8374250425,3.4575193459,2.5187853317
C,0,-1.4310282825,4.4802261882,-0.6993376746
H,0,-0.8374250425,3.4575193459,-2.5187853317
H,0,-1.9145643023,5.2969465112,1.2263478361
H,0,-1.9145643023,5.2969465112,-1.2263478361
C,0,-0.2572680924,-2.5057339209,0.7089825557
C,0,-0.9184797203,-3.5041664492,1.407115698
C,0,-0.2572680924,-2.5057339209,-0.7089825557
C,0,-1.587821526,-4.5079226889,0.6958837845
H,0,-0.9256782855,-3.5023207426,2.492377741
C,0,-0.9184797203,-3.5041664492,-1.407115698
C,0,-1.587821526,-4.5079226889,-0.6958837845
H,0,-2.1087791837,-5.2920099205,1.2362448573
H,0,-0.9256782855,-3.5023207426,-2.492377741
H,0,-2.1087791837,-5.2920099205,-1.2362448573
C,0,3.1852176885,1.8524307427,1.4335398164
H,0,3.192266202,1.8693488301,2.5187437512
C,0,3.1315398955,-1.7761041423,1.4067911028
H,0,3.1310647136,-1.7845495764,2.4922729972
Bq,0,0.371145726,-0.09720001,0.
Bq,0,1.370958727,-0.116538143,0.
Bq,0,-0.628667275,-0.077861877,0.
```

Ar = benzene-1,2-diyl, R<sup>1</sup> = naphthalene-1,8-diyl, R<sup>2</sup> = -, delocalised structure

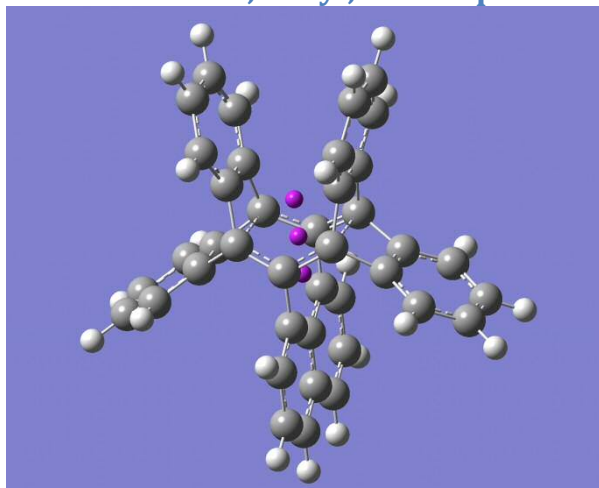

**RB3LYP/6-311+G(d) level:**  
**C<sup>∞</sup>C bond length:** 2.23698 Å  
**Electronic energy:** -1537.650608 Hartrees  
**Gibbs free energy:** -1537.224130 Hartrees  
**Imaginary frequency:** 18.6i cm<sup>-1</sup>  
**Point group:** C<sub>2v</sub>

**UB3LYP/6-311+G(d)//RB3LYP/6-311+G(d) level:**  
**Electronic energy (singlet):** -1537.650900 Hartrees  
**<S<sup>2</sup>> (singlet):** 0.1810  
**NICS(0):** -12.1676 ppm  
**NICS(1):** -1.6852 ppm  
**NICS(-1):** -2.0465 ppm  
**Isotropic magnetic susceptibility:** -8.0513 cgs-ppm  
**Electronic energy (triplet):** -1537.619680 Hartrees  
**<S<sup>2</sup>> (triplet):** 2.0654

**Cartesian coordinates:**

```
C,0,1.2507633752,0.5616748629,1.1184908443
C,0,1.2507633752,0.5616748629,-1.1184908443
C,0,-0.0024300356,-0.0291139559,-1.339829806
C,0,-1.2366622695,0.6003281585,-1.1184892266
C,0,-1.2366622695,0.6003281585,1.1184892266
C,0,-0.0024300356,-0.0291139559,1.339829806
C,0,-0.0258952749,-1.5391396776,-1.2769364788
C,0,-0.0363130036,-2.2095351724,0.
C,0,-0.0373025849,-2.2732179941,-2.4413866918
C,0,-0.0258952749,-1.5391396776,1.2769364788
C,0,-0.0586022947,-3.6438813006,0.
C,0,-0.0592320766,-3.6844117131,-2.427433258
H,0,-0.0291532453,-1.7487987899,-3.391987945
C,0,-0.0373025849,-2.2732179941,2.4413866918
C,0,-0.0696091728,-4.3521908955,1.2306195094
C,0,-0.0696091728,-4.3521908955,-1.2306195094
H,0,-0.0677453031,-4.2322522856,-3.3643305701
C,0,-0.0592320766,-3.6844117131,2.427433258
H,0,-0.0291532453,-1.7487987899,3.391987945
H,0,-0.0864799379,-5.4378498175,1.2048478108
H,0,-0.0864799379,-5.4378498175,-1.2048478108
H,0,-0.0677453031,-4.2322522856,3.3643305701
C,0,-1.4460162211,2.0386540244,0.6986229155
C,0,-1.4460162211,2.0386540244,-0.6986229155
C,0,-1.7540933301,3.1838705026,-1.4162813887
C,0,-2.0533605538,4.3483226816,0.6974919238
C,0,-2.0533605538,4.3483226816,-0.6974919238
H,0,-2.2928622174,5.2620295628,1.2323296982
H,0,-2.2928622174,5.2620295628,-1.2323296982
C,0,1.5047062931,1.9928009422,-0.6986229916
C,0,1.5047062931,1.9928009422,0.6986229916
C,0,1.8482174205,3.1278924398,-1.4162812585
C,0,2.1835206206,4.2824839921,-0.6974919133
C,0,2.1835206206,4.2824839921,0.6974919133
H,0,2.4512962541,5.1883081842,-1.2323297437
H,0,2.4512962541,5.1883081842,1.2323297437
H,0,-1.762358541,3.1848936925,-2.5019441589
H,0,1.8565104077,3.1286582971,-2.5019440283
C,0,-2.4542700537,-0.208399809,0.6994113812
C,0,-2.4542700537,-0.208399809,-0.6994113812
C,0,-3.4717701557,-0.8173465561,1.4167762705
C,0,-3.4717701557,-0.8173465561,-1.4167762705
C,0,-4.5007109211,-1.4404714617,0.6972761408
H,0,-3.4692665496,-0.8284214068,2.5022900669
C,0,-4.5007109211,-1.4404714617,-0.6972761408
H,0,-3.4692665496,-0.8284214068,-2.5022900669
H,0,-5.3073596832,-1.9314987141,1.2325165975
H,0,-5.3073596832,-1.9314987141,-1.2325165975
C,0,2.4426545073,-0.284495203,0.6994114669
C,0,3.4407424714,-0.9247633911,1.4167761428
C,0,2.4426545073,-0.284495203,-0.6994114669
C,0,4.4498249592,-1.5795583289,0.6972761238
H,0,3.4378959177,-0.9357550848,2.5022899397
C,0,3.4407424714,-0.9247633911,-1.4167761428
C,0,4.4498249592,-1.5795583289,-0.6972761238
H,0,5.2408271984,-2.0954123553,1.2325166463
H,0,3.4378959177,-0.9357550848,-2.5022899397
H,0,5.2408271984,-2.0954123553,-1.2325166463
C,0,-1.7540933301,3.1838705026,1.4162813887
H,0,-1.762358541,3.1848936925,2.5019441589
C,0,1.8482174205,3.1278924398,1.4162812585
H,0,1.8565104077,3.1286582971,2.5019440283
Bq,0,0.003890357,0.377629689,0.
Bq,0,-0.011647245,-0.622249596,0.
Bq,0,0.019427959,1.377508973,0.
```



Ar = benzene-1,2-diyl, R<sup>1</sup> = -COOCO-, R<sup>2</sup> = -, localised structure

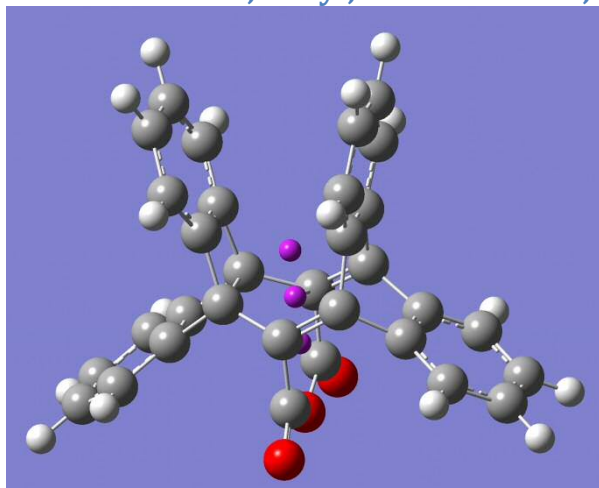

**RB3LYP/6-311+G(d) level:**  
**Allyl-allyl C–C bond length:** 1.73282 Å  
**Distance between terminal allyl C atoms:** 2.41028 Å  
**Sum of bond angles for terminal allyl C:** 349.728°  
**Electronic energy:** -1454.858697 Hartrees  
**Gibbs free energy:** -1454.531940 Hartrees  
**No imaginary frequencies**  
**Point group:** *C<sub>s</sub>*

**UB3LYP/6-311+G(d)//RB3LYP/6-311+G(d) level:**  
**Electronic energy (singlet):** -1454.858697 Hartrees  
**<S<sup>2</sup>> (singlet):** 0.0000  
**NICS(0):** -4.0922 ppm  
**NICS(1):** 0.5517 ppm  
**NICS(-1):** -3.0021 ppm  
**Isotropic magnetic susceptibility:** -57.4671 cgs-ppm

**Cartesian coordinates:**

```
C,0,1.1713902731,0.8664115158,-0.0654158312
C,0,1.1713902731,-0.8664115158,-0.0654158312
C,0,-1.3350675711,-1.205139207,-0.0302078323
C,0,-1.3350675711,1.205139207,-0.0302078323
C,0,-1.5327934492,0.7045196935,-1.4349586648
C,0,-1.5327934492,-0.7045196935,-1.4349586648
C,0,-1.7944226604,-1.4089717807,-2.6001483082
C,0,-2.0492653014,0.6964000044,-3.7770639457
C,0,-2.0492653014,-0.6964000044,-3.7770639457
H,0,-2.2547380444,1.2353655578,-4.6962093403
H,0,-2.2547380444,-1.2353655578,-4.6962093403
C,0,1.4799715219,-0.6959134653,-1.5500871264
C,0,1.4799715219,0.6959134653,-1.5500871264
C,0,1.8623549439,-1.434983119,-2.6560948251
C,0,2.2333716983,-0.6996898211,-3.7907601405
C,0,2.2333716983,0.6996898211,-3.7907601405
H,0,2.5351852354,-1.2258775346,-4.6908554763
H,0,2.5351852354,1.2258775346,-4.6908554763
H,0,-1.8007736903,-2.4941255165,-2.5994019323
H,0,1.877837098,-2.5199075131,-2.6633180351
C,0,-2.4872180663,0.7083664986,0.8229023689
C,0,-2.4872180663,-0.7083664986,0.8229023689
C,0,-3.4463969087,1.4109668056,1.5348157921
C,0,-3.4463969087,-1.4109668056,1.5348157921
C,0,-4.4144526063,0.6958317768,2.2511510346
H,0,-3.4359978402,2.4955583952,1.551709058
C,0,-4.4144526063,-0.6958317768,2.2511510346
H,0,-3.4359978402,-2.4955583952,1.551709058
H,0,-5.1672376661,1.2349200183,2.8167373028
H,0,-5.1672376661,-1.2349200183,2.8167373028
C,0,2.4253605347,0.6963642142,0.799682186
C,0,3.4051242956,1.4365542996,1.4374216782
C,0,2.4253605347,-0.6963642142,0.799682186
C,0,4.4037092018,0.6991966958,2.0917499939
H,0,3.4053675493,2.5211401758,1.4593131245
C,0,3.4051242956,-1.4365542996,1.4374216782
C,0,4.4037092018,-0.6991966958,2.0917499939
H,0,5.1928720913,1.2251920467,2.619319049
H,0,3.4053675493,-2.5211401758,1.4593131245
H,0,5.1928720913,-1.2251920467,2.619319049
C,0,-1.7944226604,1.4089717807,-2.6001483082
H,0,-1.8007736903,2.4941255165,-2.5994019323
C,0,1.8623549439,1.434983119,-2.6560948251
H,0,1.877837098,2.5199075131,-2.6633180351
C,0,-0.1115920446,1.3244471207,0.5396973903
C,0,-0.1115920446,-1.3244471207,0.5396973903
C,0,-0.0738696526,1.2711586085,2.0474690799
O,0,-0.0943191153,2.2133027178,2.7776460465
C,0,-0.0738696526,-1.2711586085,2.0474690799
O,0,-0.0943191153,-2.2133027178,2.7776460465
O,0,0.0112001664,0.,2.6396327696
Bq,0,-0.091756448,0.,0.148024576
Bq,0,-0.11090661,0.,-0.851792043
Bq,0,-0.072606285,0.,1.147841194
```

Ar = benzene-1,2-diyl, R<sup>1</sup> = -COOCO-, R<sup>2</sup> = -, delocalised structure

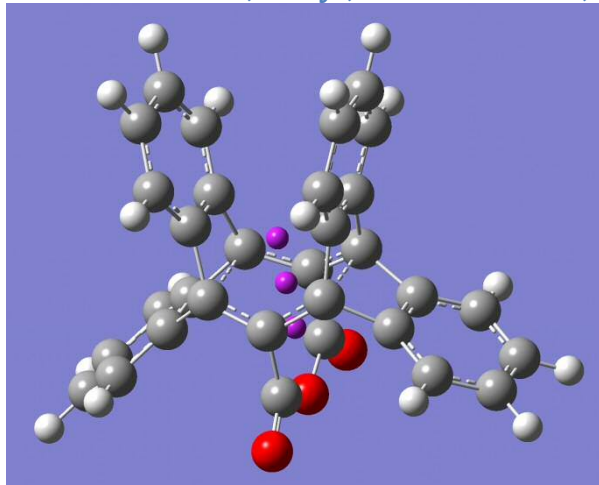

**RB3LYP/6-311+G(d) level:**  
**C<sup>∞</sup>C bond length:** 2.21731 Å  
**Electronic energy:** -1454.854174 Hartrees  
**Gibbs free energy:** -1454.528214 Hartrees  
**Imaginary frequency:** 100.7*i* cm<sup>-1</sup>  
**Point group:** C<sub>2v</sub>

**UB3LYP/6-311+G(d)//RB3LYP/6-311+G(d) level:**  
**Electronic energy (singlet):** -1454.854325 Hartrees  
**<S<sup>2</sup>> (singlet):** 0.0866  
**NICS(0):** -12.8286 ppm  
**NICS(1):** -2.5498 ppm  
**NICS(-1):** -6.2439 ppm  
**Isotropic magnetic susceptibility:** -117.8085 cgs-ppm  
**Electronic energy (triplet):** -1454.819775 Hartrees  
**<S<sup>2</sup>> (triplet):** 2.0647

**Cartesian coordinates:**

```
C,0,1.2528154122,1.1086534118,-0.051973859
C,0,1.2528154122,-1.1086534118,-0.051973859
C,0,-1.2528154122,-1.1086534118,-0.051973859
C,0,-1.2528154122,1.1086534118,-0.051973859
C,0,-1.4993141869,0.6980040993,-1.4857699528
C,0,-1.4993141869,-0.6980040993,-1.4857699528
C,0,-1.8221903313,-1.4184411006,-2.6249330778
C,0,-2.1387806293,0.6977046074,-3.7832713426
C,0,-2.1387806293,-0.6977046074,-3.7832713426
H,0,-2.3922802421,1.2316943543,-4.6934024956
H,0,-2.3922802421,-1.2316943543,-4.6934024956
C,0,1.4993141869,-0.6980040993,-1.4857699528
C,0,1.4993141869,0.6980040993,-1.4857699528
C,0,1.8221903313,-1.4184411006,-2.6249330778
C,0,2.1387806293,-0.6977046074,-3.7832713426
C,0,2.1387806293,0.6977046074,-3.7832713426
H,0,2.3922802421,-1.2316943543,-4.6934024956
H,0,2.3922802421,1.2316943543,-4.6934024956
H,0,-1.8292348203,-2.5037595995,-2.6259364946
H,0,1.8292348203,-2.5037595995,-2.6259364946
C,0,-2.4329961299,0.699465196,0.8142103932
C,0,-2.4329961299,-0.699465196,0.8142103932
C,0,-3.3970594618,1.4204945362,1.4994323148
C,0,-3.3970594618,-1.4204945362,1.4994323148
C,0,-4.3762620489,0.6971157778,2.1951792099
H,0,-3.3854130965,2.5052585545,1.5212094874
C,0,-4.3762620489,-0.6971157778,2.1951792099
H,0,-3.3854130965,-2.5052585545,1.5212094874
H,0,-5.1399109585,1.2311834723,2.7510481717
H,0,-5.1399109585,-1.2311834723,2.7510481717
C,0,2.4329961299,0.699465196,0.8142103932
C,0,3.3970594618,1.4204945362,1.4994323148
C,0,2.4329961299,-0.699465196,0.8142103932
C,0,4.3762620489,0.6971157778,2.1951792099
H,0,3.3854130965,2.5052585545,1.5212094874
C,0,3.3970594618,-1.4204945362,1.4994323148
C,0,4.3762620489,-0.6971157778,2.1951792099
H,0,5.1399109585,1.2311834723,2.7510481717
H,0,3.3854130965,-2.5052585545,1.5212094874
H,0,5.1399109585,-1.2311834723,2.7510481717
C,0,-1.8221903313,1.4184411006,-2.6249330778
H,0,-1.8292348203,2.5037595995,-2.6259364946
C,0,1.8221903313,1.4184411006,-2.6249330778
H,0,1.8292348203,2.5037595995,-2.6259364946
C,0,0.,1.3400577435,0.5275342128
C,0,0.,-1.3400577435,0.5275342128
C,0,0.,1.275673997,2.0411170364
O,0,0.,2.2135676363,2.776326062
C,0,0.,-1.275673997,2.0411170364
O,0,0.,-2.2135676363,2.776326062
O,0,0.,0.,2.6304486696
Bq,0,0.,0.,0.141195498
Bq,0,0.,0.,-0.858804502
Bq,0,0.,0.,1.141195498
```

Ar = R<sup>1</sup> = benzene-1,2-diyl, R<sup>2</sup> = -, localised structure

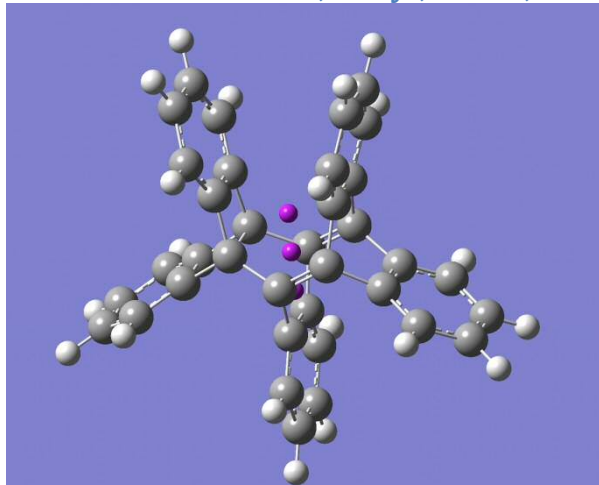

**RB3LYP/6-311+G(d) level:**  
**Allyl-allyl C–C bond length:** 1.73159 Å  
**Distance between terminal allyl C atoms:** 2.41017 Å  
**Sum of bond angles for terminal allyl C:** 348.078°  
**Electronic energy:** -1383.955487 Hartrees  
**Gibbs free energy:** -1383.572198 Hartrees  
**No imaginary frequencies**  
**Point group:** C<sub>s</sub>

**UB3LYP/6-311+G(d)//RB3LYP/6-311+G(d) level:**  
**Electronic energy (singlet):** -1383.955487 Hartrees  
**<S<sup>2</sup>> (singlet):** 0.0000  
**NICS(0):** -6.5249 ppm  
**NICS(1):** 0.4163 ppm  
**NICS(-1):** -5.9224 ppm  
**Isotropic magnetic susceptibility:** -44.1553 cgs-ppm

**Cartesian coordinates:**

```
C,0,-0.5588722134,-1.063919325,0.8657971139
C,0,-0.5588722134,-1.063919325,-0.8657971139
C,0,-0.3034041446,0.3610640742,-1.2556163855
C,0,0.9287912935,0.9405456454,-1.2050844185
C,0,0.9287912935,0.9405456454,1.2050844185
C,0,-0.3034041446,0.3610640742,1.2556163855
C,0,-1.436521451,1.203002755,-0.7147761378
C,0,-1.436521451,1.203002755,0.7147761378
C,0,-2.4029379349,1.9190039631,-1.403095306
C,0,-3.3679148685,2.6447748348,-0.6951962817
H,0,-2.4056010432,1.9217945955,-2.4884099098
C,0,-3.3679148685,2.6447748348,0.6951962817
H,0,-4.1202524283,3.2088992664,-1.2372403959
H,0,-4.1202524283,3.2088992664,1.2372403959
C,0,2.1628939745,0.2202806668,0.7094371767
C,0,2.1628939745,0.2202806668,-0.7094371767
C,0,3.2544450728,-0.2712448567,-1.4071070282
C,0,4.346580697,-0.783029533,0.6957927201
C,0,4.346580697,-0.783029533,-0.6957927201
H,0,5.2027182471,-1.1749394546,1.2357195976
H,0,5.2027182471,-1.1749394546,-1.2357195976
C,0,0.4498991478,-2.1981033349,-0.6967936186
C,0,0.4498991478,-2.1981033349,0.6967936186
C,0,1.0936784214,-3.1775031302,-1.4332968601
C,0,1.7696087691,-4.1628564534,-0.6994291915
C,0,1.7696087691,-4.1628564534,0.6994291915
H,0,2.2993283936,-4.9506453347,-1.2261029372
H,0,2.2993283936,-4.9506453347,1.2261029372
H,0,3.2615314979,-0.2619240013,-2.492519708
H,0,1.086224135,-3.1974249414,-2.518461963
C,0,1.0302855165,2.3684050389,0.7065752439
C,0,1.0302855165,2.3684050389,-0.7065752439
C,0,1.1496626115,3.556426702,1.4089197379
C,0,1.1496626115,3.556426702,-1.4089197379
C,0,1.270744173,4.7568674772,0.6959339317
H,0,1.1451056887,3.558880237,2.4944895248
C,0,1.270744173,4.7568674772,-0.6959339317
H,0,1.1451056887,3.558880237,-2.4944895248
H,0,1.367427004,5.6938040311,1.2353779927
H,0,1.367427004,5.6938040311,-1.2353779927
C,0,-1.9904738406,-1.5865713963,0.6960142824
C,0,-3.0698591295,-2.0379229257,1.4342786043
C,0,-1.9904738406,-1.5865713963,-0.6960142824
C,0,-4.1752926405,-2.4944643992,0.6992506814
H,0,-3.0840273181,-2.037342338,2.5196949897
C,0,-3.0698591295,-2.0379229257,-1.4342786043
C,0,-4.1752926405,-2.4944643992,-0.6992506814
H,0,-5.0530663628,-2.8559452286,1.2260148477
H,0,-3.0840273181,-2.037342338,-2.5196949897
H,0,-5.0530663628,-2.8559452286,-1.2260148477
C,0,3.2544450728,-0.2712448567,1.4071070282
H,0,3.2615314979,-0.2619240013,2.492519708
C,0,1.0936784214,-3.1775031302,1.4332968601
H,0,1.086224135,-3.1974249414,2.518461963
C,0,-2.4029379349,1.9190039631,1.403095306
H,0,-2.4056010432,1.9217945955,2.4884099098
Bq,0,0.022171645,0.079230132,0.
Bq,0,0.829518281,-0.510847329,0.
Bq,0,-0.78517499,0.669307593,0.
```

Ar = R<sup>1</sup> = benzene-1,2-diyl, R<sup>2</sup> = -, delocalised structure

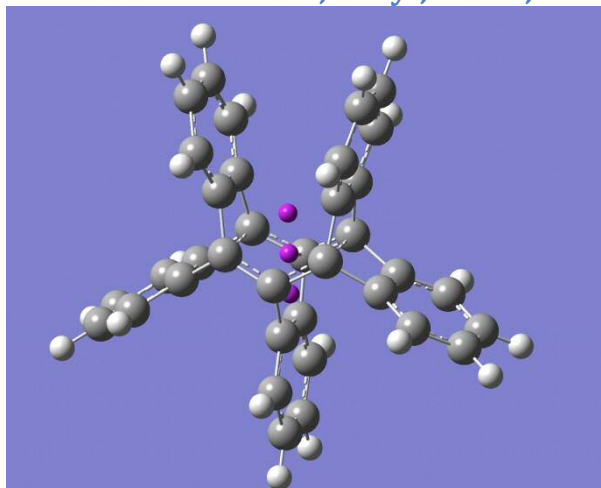

**RB3LYP/6-311+G(d) level:**  
**C<sup>∞</sup>C bond length:** 2.20657 Å  
**Electronic energy:** -1383.950399 Hartrees  
**Gibbs free energy:** -1383.567467 Hartrees  
**Imaginary frequency:** 175.7i cm<sup>-1</sup>  
**Point group:** C<sub>2v</sub>

**UB3LYP/6-311+G(d)//RB3LYP/6-311+G(d) level:**  
**Electronic energy (singlet):** -1383.950600 Hartrees  
**<S<sup>2</sup>> (singlet):** 0.0000  
**NICS(0):** -15.6918 ppm  
**NICS(1):** -2.5996 ppm  
**NICS(-1):** -10.0839 ppm  
**Isotropic magnetic susceptibility:** 93.7166 cgs-ppm  
**Electronic energy (triplet):** -1383.911798 Hartrees  
**<S<sup>2</sup>> (triplet):** 2.0736

**Cartesian coordinates:**

C,0,-1.2462190327,-1.103286123,-0.2000696093  
C,0,-1.2462190327,1.103286123,-0.2000696093  
C,0,0.,1.2698345866,0.4347864865  
C,0,1.2462190327,1.103286123,-0.2000696093  
C,0,1.2462190327,-1.103286123,-0.2000696093  
C,0,0.,-1.2698345866,0.4347864865  
C,0,0.,0.7163201987,1.8462425792  
C,0,0.,-0.7163201987,1.8462425792  
C,0,0.,1.4022287775,3.0491087624  
C,0,0.,0.6945625528,4.2581304731  
H,0,0.,2.4875450661,3.053629027  
C,0,0.,-0.6945625528,4.2581304731  
H,0,0.,1.2373109488,5.1981280566  
H,0,0.,-1.2373109488,5.1981280566  
C,0,1.4745701782,-0.700771051,-1.6448714821  
C,0,1.4745701782,0.700771051,-1.6448714821  
C,0,1.8019249923,1.4168469585,-2.7849321319  
C,0,2.1180250028,-0.6973511569,-3.9447824949  
C,0,2.1180250028,0.6973511569,-3.9447824949  
H,0,2.3722499328,-1.2320799454,-4.854539703  
H,0,2.3722499328,1.2320799454,-4.854539703  
C,0,-1.4745701782,0.700771051,-1.6448714821  
C,0,-1.4745701782,-0.700771051,-1.6448714821  
C,0,-1.8019249923,1.4168469585,-2.7849321319  
C,0,-2.1180250028,0.6973511569,-3.9447824949  
C,0,-2.1180250028,-0.6973511569,-3.9447824949  
H,0,-2.3722499328,1.2320799454,-4.854539703  
H,0,-2.3722499328,-1.2320799454,-4.854539703  
H,0,1.81331088,2.5024265215,-2.785854937  
H,0,-1.81331088,2.5024265215,-2.785854937  
C,0,2.4677337758,-0.6979965482,0.6081897432  
C,0,2.4677337758,0.6979965482,0.6081897432  
C,0,3.4791473548,-1.4187008051,1.2212263521  
C,0,3.4791473548,1.4187008051,1.2212263521  
C,0,4.5074292238,-0.6973703488,1.8450122696  
H,0,3.4767997027,-2.5044477611,1.23152613  
C,0,4.5074292238,0.6973703488,1.8450122696  
H,0,3.4767997027,2.5044477611,1.23152613  
H,0,5.3145209467,-1.2315838504,2.3364495312  
H,0,5.3145209467,1.2315838504,2.3364495312  
C,0,-2.4677337758,-0.6979965482,0.6081897432  
C,0,-3.4791473548,-1.4187008051,1.2212263521  
C,0,-2.4677337758,0.6979965482,0.6081897432  
C,0,-4.5074292238,-0.6973703488,1.8450122696  
H,0,-3.4767997027,-2.5044477611,1.23152613  
C,0,-3.4791473548,1.4187008051,1.2212263521  
C,0,-4.5074292238,0.6973703488,1.8450122696  
H,0,-5.3145209467,-1.2315838504,2.3364495312  
H,0,-3.4767997027,2.5044477611,1.23152613  
H,0,-5.3145209467,1.2315838504,2.3364495312  
C,0,1.8019249923,-1.4168469585,-2.7849321319  
H,0,1.81331088,-2.5024265215,-2.785854937  
C,0,-1.8019249923,-1.4168469585,-2.7849321319  
H,0,-1.81331088,-2.5024265215,-2.785854937  
C,0,0.,-1.4022287775,3.0491087624  
H,0,0.,-2.4875450661,3.053629027  
Bq,0,0.,0.,0.011549089  
Bq,0,0.,0.,-0.988450911  
Bq,0,0.,0.,1.011549089

Ar = benzene-1,2-diyl, R<sup>1</sup> = phenanthrene-4,5-diyl, R<sup>2</sup> = -, localised structure

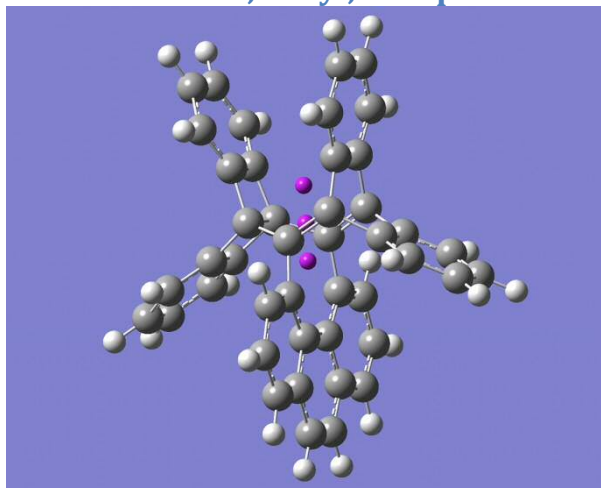

**RB3LYP/6-311+G(d) level:**  
**Allyl-allyl C–C bond length:** 1.71663 Å  
**Distance between terminal allyl C atoms:**  
 2.43227 Å  
**Sum of bond angles for terminal allyl C:**  
 349.138°  
**Electronic energy:** -1691.315812 Hartrees  
**Gibbs free energy:** -1690.845597 Hartrees  
**No imaginary frequencies**  
**Point group:** *C<sub>s</sub>*

**UB3LYP/6-311+G(d)//RB3LYP/6-311+G(d) level:**  
**Electronic energy (singlet):** -1691.315812 Hartrees  
**<S<sup>2</sup>> (singlet):** 0.0000  
**NICS(0):** -24.0643 ppm  
**NICS(1):** -0.6730 ppm  
**NICS(-1):** 1.0442 ppm  
**Isotropic magnetic susceptibility:** -190.8229 cgs-ppm

**Cartesian coordinates:**

```
C,0,1.1218125758,0.926267929,0.8583147853
C,0,1.1218125758,0.926267929,-0.8583147853
C,0,-0.1504847912,0.3016104886,-1.3333697304
C,0,-1.3707120405,0.8765164973,-1.2161327728
C,0,-1.3707120405,0.8765164973,1.2161327728
C,0,-0.1504847912,0.3016104886,1.3333697304
C,0,0.0676646735,-2.2821268435,-0.7481407355
C,0,0.0676646735,-2.2821268435,0.7481407355
C,0,0.1882561116,-3.560645804,-1.4054366495
C,0,0.3264662327,-4.7795481623,-0.6726487718
C,0,0.3264662327,-4.7795481623,0.6726487718
H,0,0.4242483916,-5.7054933469,-1.2305361915
H,0,0.4242483916,-5.7054933469,1.2305361915
C,0,-1.5651435585,2.2725144751,0.7031503323
C,0,-1.5651435585,2.2725144751,-0.7031503323
C,0,-1.8284678941,3.439196226,-1.4070127727
C,0,-2.0853292321,4.6167013253,0.6966347668
C,0,-2.0853292321,4.6167013253,-0.6966347668
H,0,-2.2907545673,5.5360640041,1.2359218219
H,0,-2.2907545673,5.5360640041,-1.2359218219
C,0,1.4294744638,2.41467087,-0.6959197503
C,0,1.4294744638,2.41467087,0.6959197503
C,0,1.8113531415,3.5215657015,-1.4340986222
C,0,2.1836444688,4.6568356282,-0.6995928962
C,0,2.1836444688,4.6568356282,0.6995928962
H,0,2.4847107222,5.5572670002,-1.226127517
H,0,2.4847107222,5.5572670002,1.226127517
H,0,-1.8352640003,3.4389562608,-2.4925627697
H,0,1.8258836753,3.5305466565,-2.5193517909
C,0,-2.5233358311,0.027919875,0.7103737183
C,0,-2.5233358311,0.027919875,-0.7103737183
C,0,-3.5049035282,-0.6608713816,1.4066338474
C,0,-3.5049035282,-0.6608713816,-1.4066338474
C,0,-4.4893762358,-1.3584430799,0.6957926593
H,0,-3.5032697625,-0.6688822315,2.4917658366
C,0,-4.4893762358,-1.3584430799,-0.6957926593
H,0,-3.5032697625,-0.6688822315,-2.4917658366
H,0,-5.2581961089,-1.9012673732,1.2366491227
H,0,-5.2581961089,-1.9012673732,-1.2366491227
C,0,2.3925288262,0.0839527847,0.6959477511
C,0,3.4047252487,-0.5062283426,1.4341323923
C,0,2.3925288262,0.0839527847,-0.6959477511
C,0,4.4310385422,-1.1177796361,0.69962541
H,0,3.4119101621,-0.5199665893,2.5191116601
C,0,3.4047252487,-0.5062283426,-1.4341323923
C,0,4.4310385422,-1.1177796361,-0.69962541
H,0,5.2452264773,-1.6059052662,1.2263933845
H,0,3.4119101621,-0.5199665893,-2.5191116601
H,0,5.2452264773,-1.6059052662,-1.2263933845
C,0,-1.8284678941,3.439196226,1.4070127727
H,0,-1.8352640003,3.4389562608,2.4925627697
C,0,1.8113531415,3.5215657015,1.4340986222
H,0,1.8258836753,3.5305466565,2.5193517909
C,0,0.1882561116,-3.560645804,1.4054366495
C,0,0.1715546227,-3.6997075786,-2.8105175964
C,0,0.0275742392,-2.6127663822,-3.6313581965
H,0,0.2689582684,-4.6980431752,-3.2254802406
H,0,0.0042483076,-2.7156017489,-4.7112568115
C,0,0.1715546227,-3.6997075786,2.8105175964
C,0,0.0275742392,-2.6127663822,3.6313581965
H,0,0.2689582684,-4.6980431752,3.2254802406
H,0,0.0042483076,-2.7156017489,4.7112568115
C,0,-0.0876765846,-1.3581963195,-3.0322643172
C,0,-0.0633465188,-1.1649386055,-1.6525575158
H,0,-0.1951335413,-0.4809419604,-3.6605242905
C,0,-0.0876765846,-1.3581963195,3.0322643172
C,0,-0.0633465188,-1.1649386055,1.6525575158
H,0,-0.1951335413,-0.4809419604,3.6605242905
Bq,0,-0.133128085,0.701464972,0.
Bq,0,-0.271416271,1.688129999,-0.085839973
Bq,0,0.005160101,-0.285200056,0.085839973
```

Ar = benzene-1,2-diyl, R<sup>1</sup> = phenanthrene-4,5-diyl, R<sup>2</sup> = -, delocalised structure

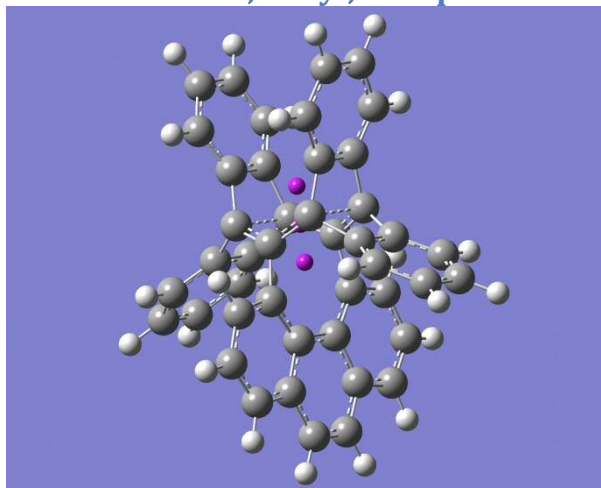

**RB3LYP/6-311+G(d) level:**  
**C<sup>∞</sup>C bond length:** 2.23458 Å  
**Electronic energy:** -1691.310281 Hartrees  
**Gibbs free energy:** -1690.840263 Hartrees  
**Imaginary frequency:** 68.6i cm<sup>-1</sup>  
**Point group:** C<sub>2v</sub>

**UB3LYP/6-311+G(d)//RB3LYP/6-311+G(d) level:**  
**Electronic energy (singlet):** -1691.310790 Hartrees  
**<S<sup>2</sup>> (singlet):** 0.2052  
**NICS(0):** -8.1157 ppm  
**NICS(1):** -0.4546 ppm  
**NICS(-1):** -2.4491 ppm  
**Isotropic magnetic susceptibility:** -120.4407 cgs-ppm  
**Electronic energy (triplet):** -1691.280651 Hartrees  
**<S<sup>2</sup>> (triplet):** 2.0635

**Cartesian coordinates:**

```
C,0,-1.244691001,1.1172875868,0.9143907224
C,0,-1.244691001,-1.1172875868,0.9143907224
C,0,0,-1.3563931555,0.3220076971
C,0,1.244691001,-1.1172875868,0.9143907224
C,0,1.244691001,1.1172875868,0.9143907224
C,0,0,1.3563931555,0.3220076971
C,0,0,-0.7496524845,-2.2751171495
C,0,0,0.7496524845,-2.2751171495
C,0,0,-1.4052300497,-3.5620742941
C,0,0,-0.6722021909,-4.7890505534
C,0,0,0.6722021909,-4.7890505534
H,0,0,-1.2303331591,-5.7199756074
H,0,0,1.2303331591,-5.7199756074
C,0,1.4852061514,0.6970536773,2.3442676393
C,0,1.4852061514,-0.6970536773,2.3442676393
C,0,1.8100081494,-1.416731233,3.4842150759
C,0,2.1282527698,0.6977382959,4.6432101116
C,0,2.1282527698,-0.6977382959,4.6432101116
H,0,2.3818863565,1.2321621529,5.5533697588
H,0,2.3818863565,-1.2321621529,5.5533697588
C,0,-1.4852061514,-0.6970536773,2.3442676393
C,0,-1.4852061514,0.6970536773,2.3442676393
C,0,-1.8100081494,-1.416731233,3.4842150759
C,0,-2.1282527698,-0.6977382959,4.6432101116
C,0,-2.1282527698,0.6977382959,4.6432101116
H,0,-2.3818863565,-1.2321621529,5.5533697588
H,0,-2.3818863565,1.2321621529,5.5533697588
H,0,1.8166243374,-2.5024443931,3.4854730716
H,0,-1.8166243374,-2.5024443931,3.4854730716
C,0,2.4331997491,0.6998366641,0.0622087005
C,0,2.4331997491,-0.6998366641,0.0622087005
C,0,3.4284780563,1.4167037491,-0.5843007001
C,0,3.4284780563,-1.4167037491,-0.5843007001
C,0,4.4322584964,0.6973284428,-1.2466360193
H,0,3.4245105583,2.5019907165,-0.597309392
C,0,4.4322584964,-0.6973284428,-1.2466360193
H,0,3.4245105583,-2.5019907165,-0.597309392
H,0,5.2184599425,1.232662647,-1.7697062553
H,0,5.2184599425,-1.232662647,-1.7697062553
C,0,-2.4331997491,0.6998366641,0.0622087005
C,0,-3.4284780563,1.4167037491,-0.5843007001
C,0,-2.4331997491,-0.6998366641,0.0622087005
C,0,-4.4322584964,0.6973284428,-1.2466360193
H,0,-3.4245105583,2.5019907165,-0.597309392
C,0,-3.4284780563,-1.4167037491,-0.5843007001
C,0,-4.4322584964,-0.6973284428,-1.2466360193
H,0,-3.4245105583,-2.5019907165,-0.597309392
H,0,-5.2184599425,1.232662647,-1.7697062553
H,0,-3.4245105583,-2.5019907165,-0.597309392
H,0,-5.2184599425,-1.232662647,-1.7697062553
C,0,1.8100081494,1.416731233,3.4842150759
H,0,1.8166243374,2.5024443931,3.4854730716
C,0,-1.8100081494,1.416731233,3.4842150759
H,0,-1.8166243374,2.5024443931,3.4854730716
C,0,0,1.4052300497,-3.5620742941
C,0,0,-2.8095063282,-3.7045833496
C,0,0,-3.636638146,-2.612436978
H,0,0,-3.2195465897,-4.709641369
H,0,0,-4.7166271312,-2.7167429769
C,0,0,2.8095063282,-3.7045833496
C,0,0,3.636638146,-2.612436978
H,0,0,3.2195465897,-4.709641369
H,0,0,4.7166271312,-2.7167429769
C,0,0,-3.0406833794,-1.3524723921
C,0,0,-1.6612477936,-1.1568286955
H,0,0,-3.6719397786,-0.4703577004
C,0,0,3.0406833794,-1.3524723921
C,0,0,1.6612477936,-1.1568286955
H,0,0,3.6719397786,-0.4703577004
Bq,0,0,0,0.716929714
Bq,0,0,1.00547222,-0.063327458,1.709844559
Bq,0,0,-1.00547222,0.063327458,-0.275985131
```

Ar = naphthalene-1,8-diyl, R<sup>1</sup> = R<sup>2</sup> = H, localised structure

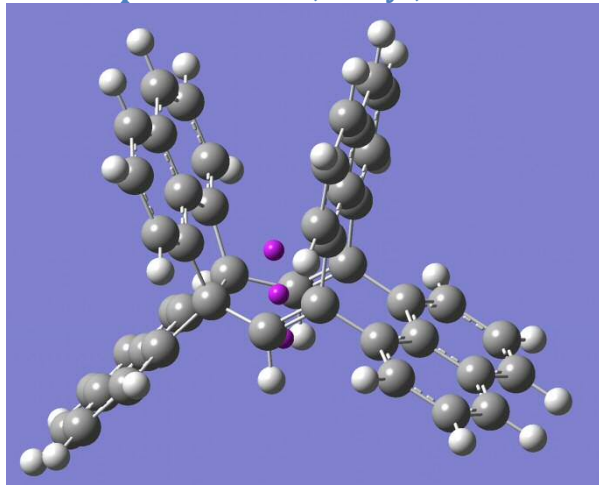

**RB3LYP/6-311+G(d) level:**  
**Allyl-allyl C–C bond length:** 1.74009 Å  
**Distance between terminal allyl C atoms:** 2.64978 Å  
**Sum of bond angles for terminal allyl C:** 359.909°  
**Electronic energy:** -1768.901955 Hartrees  
**Gibbs free energy:** -1768.396714 Hartrees  
**No imaginary frequencies**  
**Point group:** C<sub>s</sub>

**UB3LYP/6-311+G(d)//RB3LYP/6-311+G(d) level:**  
**Electronic energy (singlet):** -1768.901955 Hartrees  
**<S<sup>2</sup>> (singlet):** 0.0000  
**NICS(0):** -2.8998 ppm  
**NICS(1):** 0.7162 ppm  
**NICS(-1):** -3.7283 ppm  
**Isotropic magnetic susceptibility:** -91.6831 cgs-ppm

**Cartesian coordinates:**

```
C,0,0.8700463567,1.2766810262,-0.4083397065
C,0,-0.8700463567,1.2766810262,-0.4083397065
C,0,-1.3248880849,-1.2452639868,-0.4438762958
C,0,1.3248880849,-1.2452639868,-0.4438762958
C,0,1.2740399563,-2.4386661994,-1.3568658118
C,0,0,-2.9848000147,-1.7546710708
C,0,2.4403165102,-3.0145689171,-1.8154139241
C,0,-1.2740399563,-2.4386661994,-1.3568658118
C,0,0,-4.1251456408,-2.6278120137
C,0,2.426371085,-4.1348424164,-2.6735069642
H,0,3.3916042203,-2.5921047474,-1.5083442185
C,0,-2.4403165102,-3.0145689171,-1.8154139241
C,0,-1.2311792895,-4.6792663138,-3.0662120638
C,0,1.2311792895,-4.6792663138,-3.0662120638
H,0,3.3641670659,-4.5593761603,-3.0174704361
C,0,-2.426371085,-4.1348424164,-2.6735069642
H,0,-3.3916042203,-2.5921047474,-1.5083442185
H,0,-1.2077501541,-5.5417017053,-3.7258600826
H,0,1.2077501541,-5.5417017053,-3.7258600826
H,0,-3.3641670659,-4.5593761603,-3.0174704361
C,0,-1.2498495428,-1.5752367058,1.0161845316
C,0,0,-1.7776448474,1.6764358828
C,0,-2.425977071,-1.7773194762,1.7098070379
C,0,1.2498495428,-1.5752367058,1.0161845316
C,0,0,-2.1763215491,3.0536266359
C,0,-2.4237740761,-2.1708197826,3.064404118
H,0,-3.3731519856,-1.6268699631,1.2020772993
C,0,2.425977071,-1.7773194762,1.7098070379
C,0,1.2357968415,-2.3694669372,3.72197467
C,0,-1.2357968415,-2.3694669372,3.72197467
H,0,-3.367631467,-2.315218338,3.5804758036
C,0,2.4237740761,-2.1708197826,3.064404118
H,0,3.3731519856,-1.6268699631,1.2020772993
H,0,1.2252744573,-2.6742608021,4.7643277124
H,0,-1.2252744573,-2.6742608021,4.7643277124
H,0,3.367631467,-2.315218338,3.5804758036
C,0,-1.1815955507,2.4563326084,-1.3241847422
C,0,0,3.0713668659,-1.7830159587
C,0,-2.3952994176,2.9503786711,-1.7417846238
C,0,1.1815955507,2.4563326084,-1.3241847422
C,0,0,4.1861902744,-2.6558247354
C,0,-2.4236211361,4.0736557803,-2.610285295
H,0,-3.3298377015,2.4994433414,-1.4233457488
C,0,2.3952994176,2.9503786711,-1.7417846238
C,0,1.2685861861,4.681791577,-3.0573067279
C,0,-1.2685861861,4.681791577,-3.0573067279
H,0,-3.3860749071,4.4591466837,-2.9326307864
C,0,2.4236211361,4.0736557803,-2.610285295
H,0,3.3298377015,2.4994433414,-1.4233457488
H,0,1.3257270781,5.5364274301,-3.72501385
H,0,-1.3257270781,5.5364274301,-3.72501385
H,0,3.3860749071,4.4591466837,-2.9326307864
C,0,-1.1825881638,1.6093485773,1.0443742467
C,0,0,1.8219773757,1.7804232697
C,0,-2.3955996373,1.7940503045,1.6643690419
C,0,1.1825881638,1.6093485773,1.0443742467
C,0,0,2.219981785,3.1385418968
C,0,-2.4235522577,2.1897355614,3.0267943237
H,0,-3.3303675573,1.6408893541,1.1350188829
C,0,2.3955996373,1.7940503045,1.6643690419
C,0,1.2680579358,2.4011145779,3.7506570219
C,0,-1.2680579358,2.4011145779,3.7506570219
H,0,-3.3861684253,2.3302941862,3.5089988449
C,0,2.4235522577,2.1897355614,3.0267943237
H,0,3.3303675573,1.6408893541,1.1350188829
H,0,1.3242382918,2.7051515145,4.7918035444
H,0,-1.3242382918,2.7051515145,4.7918035444
H,0,3.3861684253,2.3302941862,3.5089988449
C,0,1.363113696,-0.0172877857,-0.9864882036
H,0,1.4449956558,0.0100269267,-2.0719175723
C,0,-1.363113696,-0.0172877857,-0.9864882036
H,0,-1.4449956558,0.0100269267,-2.0719175723
Bq,0,0,0.004709751,-0.612901402
Bq,0,0,0.014512367,0.386913836
Bq,0,0,0.023931869,-1.61271664
```

Ar = naphthalene-1,8-diyl, R<sup>1</sup> = R<sup>2</sup> = H, delocalised structure

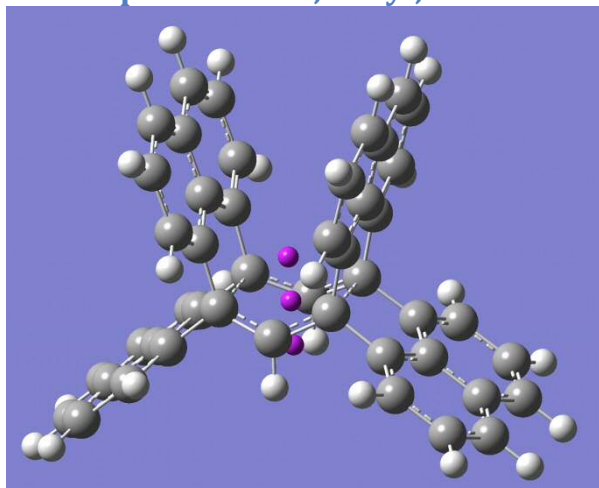

**RB3LYP/6-311+G(d) level:**  
**C<sup>∞</sup>C bond length:** 2.33282 Å  
**Electronic energy (RB3LYP, singlet state):**  
 -1768.890778 Hartrees  
**Electronic energy (UB3LYP, singlet state):**  
 -1768.890778 Hartrees  
**<S<sup>2</sup>> (UB3LYP, singlet state):** 0.0000  
**Electronic energy (UB3LYP, triplet state):**  
 -1768.793522 Hartrees  
**<S<sup>2</sup>> (UB3LYP, triplet state):** 2.0661  
**Gibbs free energy:** -1768.386045 Hartrees  
**Imaginary frequency:** 276.9i cm<sup>-1</sup>  
**Point group:** C<sub>2v</sub>

**UB3LYP/6-311+G(d)//RB3LYP/6-311+G(d) level:**  
**Electronic energy (singlet):** -1768.891065 Hartrees  
**<S<sup>2</sup>> (singlet):** 0.0000  
**NICS(0):** -15.3263 ppm  
**NICS(1):** -6.0956 ppm  
**NICS(-1):** -10.3720 ppm  
**Isotropic magnetic susceptibility:** -101.6509 cgs-ppm  
**Electronic energy (triplet):** -1768.793522 Hartrees  
**<S<sup>2</sup>> (triplet):** 2.0635

**Cartesian coordinates:**

```
C,0,1.1664118272,1.2585385944,-0.4298423076
C,0,-1.1664118272,1.2585385944,-0.4298423076
C,0,-1.1664118272,-1.2585385944,-0.4298423076
C,0,1.1664118272,-1.2585385944,-0.4298423076
C,0,1.2321994011,-2.4463649132,-1.3469362388
C,0,0,-3.0299491803,-1.7647767553
C,0,2.4190819745,-2.9872170375,-1.7952085183
C,0,-1.2321994011,-2.4463649132,-1.3469362388
C,0,0,-4.1629400751,-2.6330234806
C,0,2.4246942656,-4.1144762721,-2.6498936677
H,0,3.3629251228,-2.5474680358,-1.488886836
C,0,-2.4190819745,-2.9872170375,-1.7952085183
C,0,-1.246332435,-4.6928128165,-3.0571228497
C,0,1.246332435,-4.6928128165,-3.0571228497
H,0,3.3736509208,-4.5203610462,-2.98626002
C,0,-2.4246942656,-4.1144762721,-2.6498936677
H,0,-3.3629251228,-2.5474680358,-1.488886836
H,0,-1.2559047414,-5.5554522198,-3.7169388603
H,0,1.2559047414,-5.5554522198,-3.7169388603
H,0,-3.3736509208,-4.5203610462,-2.98626002
C,0,-1.222011405,-1.5931536901,1.030309902
C,0,0,-1.810574626,1.7202594451
C,0,-2.413092159,-1.7811959521,1.6997123468
C,0,1.222011405,-1.5931536901,1.030309902
C,0,0,-2.2142924331,3.0877530777
C,0,-2.4236822704,-2.1859369065,3.054232998
H,0,-3.3547696217,-1.6199998363,1.185229258
C,0,2.413092159,-1.7811959521,1.6997123468
C,0,1.248412293,-2.4015210712,3.7348307333
C,0,-1.248412293,-2.4015210712,3.7348307333
H,0,-3.375373183,-2.3259883577,3.5573551412
C,0,2.4236822704,-2.1859369065,3.054232998
H,0,3.3547696217,-1.6199998363,1.185229258
H,0,1.263765167,-2.7106863913,4.7758828354
H,0,-1.263765167,-2.7106863913,4.7758828354
H,0,3.375373183,-2.3259883577,3.5573551412
C,0,-1.2321994011,2.4463649132,-1.3469362388
C,0,0,3.0299491803,-1.7647767553
C,0,-2.4190819745,2.9872170375,-1.7952085183
C,0,1.2321994011,2.4463649132,-1.3469362388
C,0,0,4.1629400751,-2.6330234806
C,0,-2.4246942656,4.1144762721,-2.6498936677
H,0,-3.3629251228,2.5474680358,-1.488886836
C,0,2.4190819745,2.9872170375,-1.7952085183
C,0,1.246332435,4.6928128165,-3.0571228497
C,0,-1.246332435,4.6928128165,-3.0571228497
H,0,-3.3736509208,4.5203610462,-2.98626002
C,0,2.4246942656,4.1144762721,-2.6498936677
H,0,3.3629251228,2.5474680358,-1.488886836
H,0,1.2559047414,5.5554522198,-3.7169388603
H,0,-1.2559047414,5.5554522198,-3.7169388603
H,0,3.3736509208,4.5203610462,-2.98626002
C,0,-1.222011405,1.5931536901,1.030309902
C,0,0,1.810574626,1.7202594451
C,0,-2.413092159,1.7811959521,1.6997123468
C,0,1.222011405,1.5931536901,1.030309902
C,0,0,-2.2142924331,3.0877530777
C,0,-2.4236822704,2.1859369065,3.054232998
H,0,-3.3547696217,1.6199998363,1.185229258
C,0,2.413092159,1.7811959521,1.6997123468
C,0,1.248412293,2.4015210712,3.7348307333
C,0,-1.248412293,2.4015210712,3.7348307333
H,0,-3.375373183,2.3259883577,3.5573551412
C,0,2.4236822704,2.1859369065,3.054232998
H,0,3.3547696217,1.6199998363,1.185229258
H,0,1.263765167,2.7106863913,4.7758828354
H,0,-1.263765167,2.7106863913,4.7758828354
H,0,3.375373183,2.3259883577,3.5573551412
C,0,1.4308784997,0,-0.9763609907
H,0,1.5283211225,0,-2.0611571319
C,0,-1.4308784997,0,-0.9763609907
H,0,-1.5283211225,0,-2.0611571319
Bq,0,0,0,-0.612015202
Bq,0,0,0,0.387984798
Bq,0,0,0,-1.612015202
```



## Ar = naphthalene-2,3-diyl, R<sup>1</sup> = R<sup>2</sup> = H, localised structure

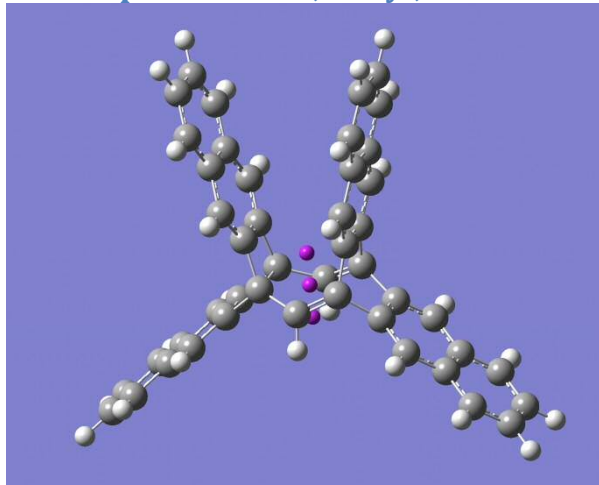

**RB3LYP/6-311+G(d) level:**  
**Allyl-allyl C–C bond length:** 1.81935 Å  
**Distance between terminal allyl C atoms:** 2.45432 Å  
**Sum of bond angles for terminal allyl C:** 351.589°  
**Electronic energy:** -1768.803499 Hartrees  
**Gibbs free energy:** -1768.303637 Hartrees  
**No imaginary frequencies**  
**Point group:** *C<sub>s</sub>*

**UB3LYP/6-311+G(d)//RB3LYP/6-311+G(d) level:**  
**Electronic energy (singlet):** -1768.803499 Hartrees  
**<S<sup>2</sup>> (singlet):** 0.0000  
**NICS(0):** -2.2315 ppm  
**NICS(1):** 0.2657 ppm  
**NICS(-1):** -3.0380 ppm  
**Isotropic magnetic susceptibility:** -193.0071 cgs-ppm

### Cartesian coordinates:

```
C,0,-1.1017453605,0.9096752808,-0.5226547162
C,0,-1.1017453605,-0.9096752808,-0.5226547162
C,0,1.3871034913,-1.2271600742,-0.5633229426
C,0,1.3871034913,1.2271600742,-0.5633229426
C,0,1.6149915676,0.7118946482,0.8229748193
C,0,1.6149915676,-0.7118946482,0.8229748193
C,0,1.8651413467,-1.4138316499,1.9709143414
C,0,2.1260555108,0.7165401206,3.1844039705
C,0,-1.477561499,-0.705782356,0.9378411876
C,0,-1.477561499,0.705782356,0.9378411876
C,0,-1.8471837922,-1.438059051,2.0282014207
C,0,-2.2273542045,0.7198679538,3.203147848
H,0,1.8634302027,-2.5000709745,1.97012093
H,0,-1.8487694638,-2.5240890194,2.0376470587
C,0,2.4797104284,0.7235611567,-1.4814087444
C,0,2.4797104284,-0.7235611567,-1.4814087444
C,0,3.3538378686,1.4140403637,-2.2726341255
C,0,4.2765722891,0.7154568705,-3.10758103
H,0,3.3471534942,2.5004143543,-2.2840996103
C,0,4.2765722891,-0.7154568705,-3.10758103
C,0,-2.2982640402,0.7071714616,-1.4467271059
C,0,-3.2039376032,1.4377582759,-2.158671551
C,0,-2.2982640402,-0.7071714616,-1.4467271059
C,0,-4.1786998283,0.719395496,-2.9206110671
H,0,-3.200684035,-2.5239870682,-2.1792210901
C,0,-3.2039376032,-1.4377582759,-2.158671551
H,0,-3.200684035,-2.5239870682,-2.1792210901
C,0,1.8651413467,1.4138316499,1.9709143414
H,0,1.8634302027,2.5000709745,1.97012093
C,0,-1.8471837922,1.438059051,2.0282014207
H,0,-1.8487694638,2.5240890194,2.0376470587
C,0,0.1537074628,1.4464772776,-1.0791370738
H,0,0.1071617358,1.637259122,-2.1498483542
C,0,0.1537074628,-1.4464772776,-1.0791370738
H,0,0.1071617358,-1.637259122,-2.1498483542
C,0,-4.1786998283,-0.719395496,-2.9206110671
C,0,-5.1562497283,-1.3973498615,-3.6924397443
C,0,-6.092781063,-0.7059697326,-4.4263206475
H,0,-5.1562903722,-2.4836444929,-3.6942576757
C,0,-5.1562497283,1.3973498615,-3.6924397443
C,0,-6.092781063,0.7059697326,-4.4263206475
H,0,-6.8338463604,-1.2449653993,-5.0078320406
H,0,-5.1562903722,2.4836444929,-3.6942576757
H,0,-6.8338463604,1.2449653993,-5.0078320406
C,0,-2.2273542045,-0.7198679538,3.203147848
C,0,-2.6137512591,-1.3975340608,4.3878905238
C,0,-2.9841368527,-0.7062421807,5.5180077843
H,0,-2.6135376168,-2.4838358494,4.3891083163
C,0,-2.6137512591,1.3975340608,4.3878905238
C,0,-2.9841368527,0.7062421807,5.5180077843
H,0,-3.2769094981,-1.2449998063,6.4135481443
H,0,-2.6135376168,2.4838358494,4.3891083163
H,0,-3.2769094981,1.2449998063,6.4135481443
C,0,2.1260555108,-0.7165401206,3.1844039705
C,0,2.3929131515,-1.3991160273,4.3985446375
C,0,2.6490471852,-0.7066097724,5.5592941409
H,0,2.3935941453,-2.4854098193,4.3984619027
C,0,2.3929131515,1.3991160273,4.3985446375
C,0,2.6490471852,0.7066097724,5.5592941409
H,0,2.8522495278,-1.2443289147,6.4799190371
H,0,2.3935941453,2.4854098193,4.3984619027
H,0,2.8522495278,1.2443289147,6.4799190371
C,0,5.1964112458,1.3982832375,-3.9415893603
C,0,5.1964112458,-1.3982832375,-3.9415893603
C,0,6.0790222884,0.7059822041,-4.7400885457
H,0,5.1960473417,2.4846142196,-3.9418163695
C,0,6.0790222884,-0.7059822041,-4.7400885457
H,0,5.1960473417,-2.4846142196,-3.9418163695
H,0,6.7775523075,1.2445045556,-5.372536434
H,0,6.7775523075,-1.2445045556,-5.372536434
C,0,3.3538378686,-1.4140403637,-2.2726341255
H,0,3.3471534942,-2.5004143543,-2.2840996103
Bq,0,0.146355198,0,-0.721704911
Bq,0,0.165124674,0,-0.278118927
Bq,0,0.127585722,0,-1.721528749
```

Ar = naphthalene-2,3-diyl, R<sup>1</sup> = R<sup>2</sup> = H, delocalised structure

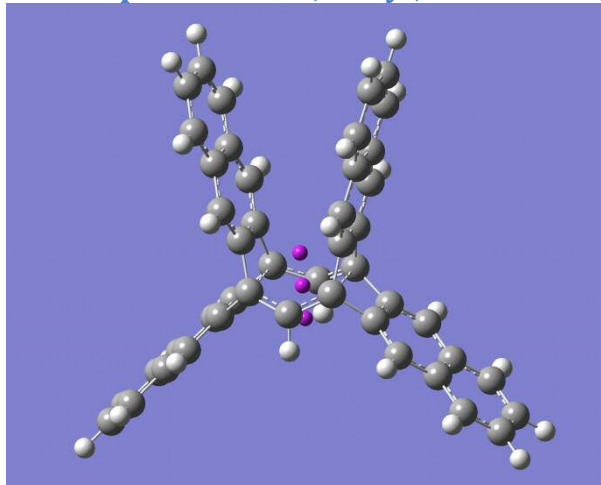

**RB3LYP/6-311+G(d) level:**  
**C<sup>∞</sup>C bond length:** 2.32570 Å  
**Electronic energy (RB3LYP, singlet state):**  
 -1768.804786 Hartrees  
**Electronic energy (UB3LYP, singlet state):**  
 -1768.804786 Hartrees  
**<S<sup>2</sup>> (UB3LYP, singlet state):** 0.0000  
**Electronic energy (UB3LYP, triplet state):**  
 -1768.793970 Hartrees  
**<S<sup>2</sup>> (UB3LYP, triplet state):** 2.0628  
**Gibbs free energy:** -1768.304341 Hartrees  
**No imaginary frequencies**  
**Point group:** C<sub>2v</sub>

**UB3LYP/6-311+G(d)//RB3LYP/6-311+G(d) level:**  
**Electronic energy (singlet):** -1768.809338 Hartrees  
**<S<sup>2</sup>> (singlet):** 0.6128  
**NICS(0):** -4.9050 ppm  
**NICS(1):** -3.3774 ppm  
**NICS(-1):** -4.8506 ppm  
**Isotropic magnetic susceptibility:** -146.2267 cgs-ppm  
**Electronic energy (triplet):** -1768.793970 Hartrees  
**<S<sup>2</sup>> (triplet):** 2.0628

**Cartesian coordinates:**

```
C,0,-1.1628488539,1.2489212905,0.4769380358
C,0,1.1628488539,1.2489212905,0.4769380358
C,0,1.1628488539,-1.2489212905,0.4769380358
C,0,-1.1628488539,-1.2489212905,0.4769380358
C,0,-0.7078976784,-1.5280329708,-0.9275915773
C,0,0.7078976784,-1.5280329708,-0.9275915773
C,0,1.4203229494,-1.8301534529,-2.0550571514
C,0,-0.7174615934,-2.147323168,-3.2543933702
C,0,0.7078976784,1.5280329708,-0.9275915773
C,0,-0.7078976784,1.5280329708,-0.9275915773
C,0,1.4203229494,1.8301534529,-2.0550571514
C,0,-0.7174615934,2.147323168,-3.2543933702
H,0,2.5067109848,-1.8217218676,-2.0577848668
H,0,2.5067109848,1.8217218676,-2.0577848668
C,0,-0.7141822334,-2.3489450386,1.4148452467
C,0,0.7141822334,-2.3489450386,1.4148452467
C,0,-1.4203686034,-3.2015419491,2.214958948
C,0,-0.7164919843,-4.1172349975,3.0570073961
H,0,-2.5065969103,-3.1806487516,2.2402022133
C,0,0.7164919843,-4.1172349975,3.0570073961
C,0,-0.7141822334,2.3489450386,1.4148452467
C,0,-1.4203686034,3.2015419491,2.214958948
C,0,0.7141822334,2.3489450386,1.4148452467
C,0,-0.7164919843,4.1172349975,3.0570073961
H,0,-2.5065969103,3.1806487516,2.2402022133
C,0,1.4203686034,3.2015419491,2.214958948
H,0,2.5065969103,3.1806487516,2.2402022133
C,0,-1.4203229494,-1.8301534529,-2.0550571514
H,0,-2.5067109848,-1.8217218676,-2.0577848668
C,0,-1.4203229494,1.8301534529,-2.0550571514
H,0,-2.5067109848,1.8217218676,-2.0577848668
C,0,-1.4904738313,0.,1.0095913665
H,0,-1.6759951158,0.,2.0820026471
C,0,1.4904738313,0.,1.0095913665
H,0,1.6759951158,0.,2.0820026471
C,0,0.7164919843,4.1172349975,3.0570073961
C,0,1.3978764524,5.0234934943,3.9059605007
C,0,0.7055465479,5.8957593144,4.7167230286
H,0,2.4841661229,5.0221865652,3.9080299504
C,0,-1.3978764524,5.0234934943,3.9059605007
C,0,-0.7055465479,5.8957593144,4.7167230286
H,0,1.2443769571,6.5851728594,5.3588014108
H,0,-2.4841661229,5.0221865652,3.9080299504
H,0,-1.2443769571,6.5851728594,5.3588014108
C,0,0.7174615934,2.147323168,-3.2543933702
C,0,1.3985389354,2.4663309894,-4.4560725482
C,0,0.706184761,2.7745389603,-5.6048134378
H,0,2.4848131074,2.4657570181,-4.4566316113
C,0,-1.3985389354,2.4663309894,-4.4560725482
C,0,-0.706184761,2.7745389603,-5.6048134378
H,0,1.2443762311,3.0179863992,-6.5153236433
H,0,-2.4848131074,2.4657570181,-4.4566316113
H,0,-1.2443762311,3.0179863992,-6.5153236433
C,0,0.7174615934,-2.147323168,-3.2543933702
C,0,1.3985389354,-2.4663309894,-4.4560725482
C,0,0.706184761,-2.7745389603,-5.6048134378
H,0,2.4848131074,-2.4657570181,-4.4566316113
C,0,-1.3985389354,-2.4663309894,-4.4560725482
C,0,-0.706184761,-2.7745389603,-5.6048134378
H,0,1.2443762311,-3.0179863992,-6.5153236433
H,0,-2.4848131074,-2.4657570181,-4.4566316113
H,0,-1.2443762311,-3.0179863992,-6.5153236433
C,0,-1.3978764524,-5.0234934943,3.9059605007
C,0,1.3978764524,-5.0234934943,3.9059605007
C,0,-0.7055465479,-5.8957593144,4.7167230286
H,0,-2.4841661229,-5.0221865652,3.9080299504
C,0,0.7055465479,-5.8957593144,4.7167230286
H,0,2.4841661229,-5.0221865652,3.9080299504
H,0,-1.2443769571,-6.5851728594,5.3588014108
H,0,1.2443769571,-6.5851728594,5.3588014108
C,0,1.4203686034,-3.2015419491,2.214958948
H,0,2.5065969103,-3.1806487516,2.2402022133
Bq,0,0.,0.,0.654489146
Bq,0,0.,0.,1.654489146
Bq,0,0.,0.,-0.345510854
```

Ar = naphthalene-2,3-diyl, R<sup>1</sup> = R<sup>2</sup> = H, localised  $\rightleftharpoons$  delocalised TS

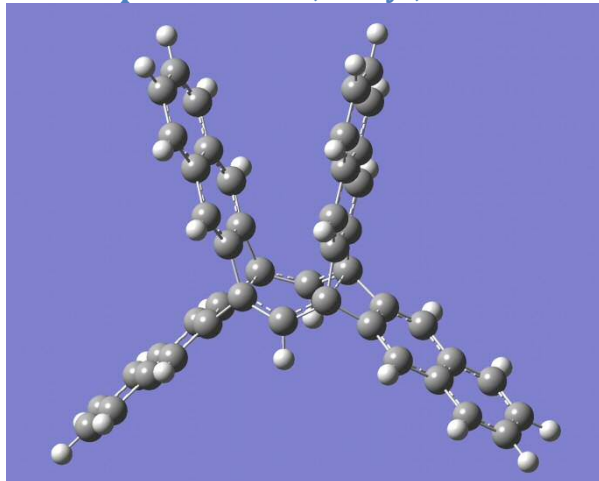

**RB3LYP/6-311+G(d) level:**  
**C<sup>••</sup>C bond lengths:** 1.99903 Å, 2.42696 Å  
**Electronic energy:** -1768.803050 Hartrees  
**Gibbs free energy:** -1768.303543 Hartrees  
**Imaginary frequency:** 220.7i cm<sup>-1</sup>  
**Point group:** C<sub>s</sub>

**UB3LYP/6-311+G(d)//RB3LYP/6-311+G(d) level:**  
**Electronic energy (singlet):** -1768.803050 Hartrees  
**<S<sup>2</sup>> (singlet):** 0.0000  
**Electronic energy (triplet):** -1768.744474 Hartrees  
**<S<sup>2</sup>> (triplet):** 2.0437

**Cartesian coordinates:**

```
C,0,-1.179798654,-0.4203189868,0.9995140834
C,0,-1.179798654,-0.4203189868,-0.9995140834
C,0,0.6035077722,1.3182488196,-1.2134776832
C,0,0.6035077722,1.3182488196,1.2134776832
C,0,1.7353057512,0.4736006422,0.7106211044
C,0,1.7353057512,0.4736006422,-0.7106211044
C,0,2.7108029282,-0.1775957914,-1.415344896
C,0,3.7402350388,-0.8709751918,0.7167819008
C,0,-0.4370321863,-1.7051594874,-0.7053787379
C,0,-0.4370321863,-1.7051594874,0.7053787379
C,0,0.0605340795,-2.7482309569,-1.4326789625
C,0,0.6022407582,-3.860106015,0.7191814961
H,0,2.7070194939,-0.1811264533,-2.5016973722
H,0,0.0673838443,-2.751799524,-2.518820193
C,0,0.7595459608,2.7408175574,0.7200331923
C,0,0.7595459608,2.7408175574,-0.7200331923
C,0,0.8493388591,3.9134752143,1.4155790264
C,0,0.9489473372,5.1539042985,0.7158021356
H,0,0.8323472944,3.9166610556,2.5020294698
C,0,0.9489473372,5.1539042985,-0.7158021356
C,0,-2.6645915845,-0.5544137757,0.7084225858
C,0,-3.819038544,-0.6280461275,1.4323083823
C,0,-2.6645915845,-0.5544137757,-0.7084225858
C,0,-5.0555161047,-0.7160346489,0.7184667196
H,0,-3.8278006821,-0.6010423465,2.5184427621
C,0,-3.819038544,-0.6280461275,-1.4323083823
H,0,-3.8278006821,-0.6010423465,-2.5184427621
C,0,2.7108029282,-0.1775957914,1.415344896
H,0,2.7070194939,-0.1811264533,2.5016973722
C,0,0.0605340795,-2.7482309569,1.4326789625
H,0,0.0673838443,-2.751799524,2.518820193
C,0,-0.6514477298,0.8411946985,1.4625177153
H,0,-1.4151604517,1.5947531399,1.6461932361
C,0,-0.6514477298,0.8411946985,-1.4625177153
H,0,-1.4151604517,1.5947531399,-1.6461932361
C,0,-5.0555161047,-0.7160346489,-0.7184667196
C,0,-6.2972525828,-0.7945710907,-1.3974639521
C,0,-7.4847796227,-0.8746128782,-0.7057844777
H,0,-6.2982521016,-0.7927402209,-2.48374578
C,0,-6.2972525828,-0.7945710907,1.3974639521
C,0,-7.4847796227,-0.8746128782,0.7057844777
H,0,-8.424701086,-0.9367692331,-1.2447897454
H,0,-6.2982521016,-0.7927402209,2.48374578
H,0,-8.424701086,-0.9367692331,1.2447897454
C,0,0.6022407582,-3.860106015,-0.7191814961
C,0,1.1422334881,-4.9822476492,-1.3977731901
C,0,1.6536523288,-6.0560045918,-0.7062006951
H,0,1.1435228924,-4.9827543064,-2.484065529
C,0,1.1422334881,-4.9822476492,1.3977731901
C,0,1.6536523288,-6.0560045918,0.7062006951
H,0,2.0592666615,-6.9064083191,-1.244936827
H,0,1.1435228924,-4.9827543064,2.484065529
H,0,2.0592666615,-6.9064083191,1.244936827
C,0,3.7402350388,-0.8709751918,-0.7167819008
C,0,4.7728049513,-1.5633702484,-1.3988731415
C,0,5.7608492768,-2.2246504636,-0.7064840538
H,0,4.77338507,-1.5629273369,-2.4851782354
C,0,4.7728049513,-1.5633702484,1.3988731415
C,0,5.7608492768,-2.2246504636,0.7064840538
H,0,6.5440129739,-2.7492957133,-1.2444032047
H,0,4.77338507,-1.5629273369,2.4851782354
H,0,6.5440129739,-2.7492957133,1.2444032047
C,0,1.047208733,6.3917787131,1.3981722759
C,0,1.047208733,6.3917787131,-1.3981722759
C,0,1.144359785,7.5781890334,0.7058802439
H,0,1.0466121858,6.391847076,2.4845022812
C,0,1.144359785,7.5781890334,-0.7058802439
H,0,1.0466121858,6.391847076,-2.4845022812
H,0,1.2206428174,8.5173290676,1.2445301507
H,0,1.2206428174,8.5173290676,-1.2445301507
C,0,0.8493388591,3.9134752143,-1.4155790264
H,0,0.8323472944,3.9166610556,-2.5020294698
```

Ar = thiophene-3,4-diyl, R<sup>1</sup> = R<sup>2</sup> = H, localised structure

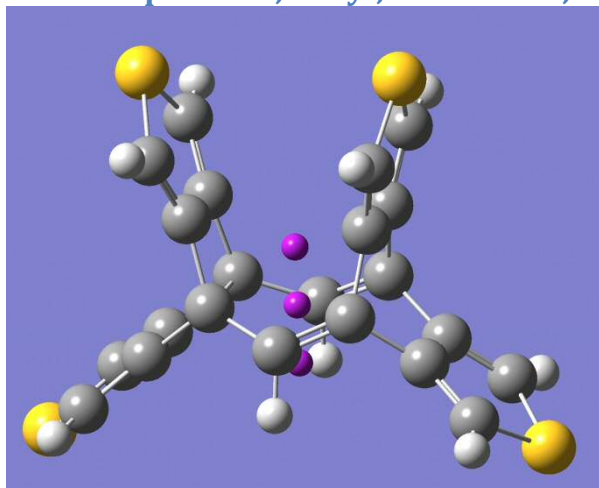

**RB3LYP/6-311+G(d) level:**  
**Allyl-allyl C–C bond length:** 1.87569 Å  
**Distance between terminal allyl C atoms:** 2.52583 Å  
**Sum of bonds for terminal allyl C:** 349.554°  
**Electronic energy:** -2437.134620 Hartrees  
**Gibbs free energy:** -2436.940774 Hartrees  
**No imaginary frequencies**  
**Point group:** *C<sub>s</sub>*

**UB3LYP/6-311+G(d)//RB3LYP/6-311+G(d) level:**  
**Electronic energy (singlet):** -2437.134620 Hartrees  
**<S<sup>2</sup>> (singlet):** 0.0000  
**NICS(0):** -0.2888 ppm  
**NICS(1):** 1.4980 ppm  
**NICS(-1):** -1.5031 ppm  
**Isotropic magnetic susceptibility:** -126.0942 cgs-ppm

**Cartesian coordinates:**

```
C,0,0.2183127211,1.3672651064,1.2629151702
C,0,0.2183127211,1.3672651064,-1.2629151702
C,0,0.4324144764,-1.1155601399,-0.9378458623
C,0,0.4324144764,-1.1155601399,0.9378458623
C,0,-0.9784726834,-1.6332301834,0.7076259615
C,0,-0.9784726834,-1.6332301834,-0.7076259615
C,0,-2.0925717099,-2.1685227361,-1.272393512
C,0,-1.1702674641,1.4444660528,-0.7169116701
C,0,-1.1702674641,1.4444660528,0.7169116701
H,0,-2.3816299823,-2.2974621221,-2.3050748037
C,0,1.4735926177,-2.2060075316,0.7088461957
C,0,1.4735926177,-2.2060075316,-0.7088461957
C,0,2.3285073474,-3.0990546833,1.272282384
H,0,2.5590317088,-3.3161455306,2.3052597156
C,0,1.0116527887,2.5371002831,0.7282128848
C,0,1.0116527887,2.5371002831,-0.7282128848
C,0,1.7369840773,3.5566586721,-1.2551641223
H,0,1.9189549754,3.7962381524,-2.2928824855
C,0,-2.4118001658,1.5828723488,1.2539051161
H,0,-2.7097748804,1.6097735743,2.291857229
C,0,2.3285073474,-3.0990546833,-1.272282384
H,0,2.5590317088,-3.3161455306,-2.3052597156
C,0,-2.0925717099,-2.1685227361,1.272393512
H,0,-2.3816299823,-2.2974621221,2.3050748037
C,0,1.7369840773,3.5566586721,1.2551641223
H,0,1.9189549754,3.7962381524,2.2928824855
C,0,-2.4118001658,1.5828723488,-1.2539051161
H,0,-2.7097748804,1.6097735743,-2.291857229
S,0,-3.6141172057,1.7088362789,0.
S,0,3.1634262758,-3.9678391855,0.
S,0,2.4456800862,4.5411884967,0.
S,0,-3.1847617361,-2.6706936163,0.
C,0,0.8610750709,0.1905354384,1.4614155418
H,0,1.9314590625,0.2516650144,1.6462122369
C,0,0.8610750709,0.1905354384,-1.4614155418
H,0,1.9314590625,0.2516650144,-1.6462122369
Bq,0,0.503934089,0.147413468,0.
Bq,0,-0.492561271,0.06376542,0.
Bq,0,1.50042945,0.231061516,0.
```

Ar = thiophene-3,4-diyl, R<sup>1</sup> = R<sup>2</sup> = H, delocalised structure

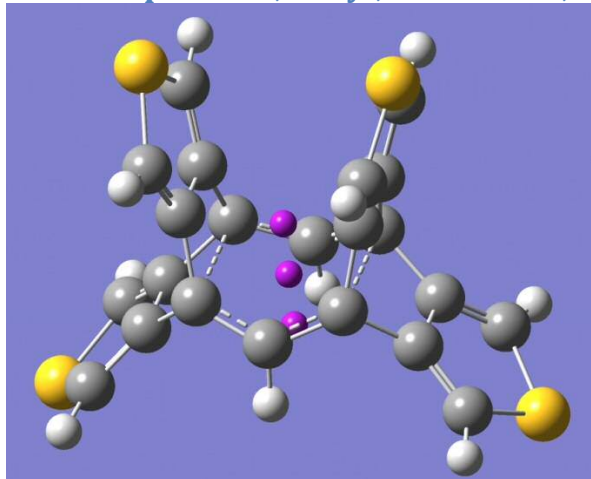

**RB3LYP/6-311+G(d) level:**  
**C-C bond length:** 2.44110 Å  
**Electronic energy:** -2437.139563 Hartrees  
**Gibbs free energy:** -2436.944656 Hartrees  
**No imaginary frequencies**  
**Point group:** C<sub>2v</sub>

**UB3LYP/6-311+G(d)//RB3LYP/6-311+G(d) level:**  
**Electronic energy (singlet):** -2437.157937 Hartrees  
**<S<sup>2</sup>> (singlet):** 0.9879  
**NICS(0):** -3.6276 ppm  
**NICS(1):** -0.8905 ppm  
**NICS(-1):** -2.8090 ppm  
**Isotropic magnetic susceptibility:** -147.1796 cgs-ppm  
**Electronic energy (triplet):** -2437.155377 Hartrees  
**<S<sup>2</sup>> (triplet):** 2.0644

**Cartesian coordinates:**

```
C,0,-1.2205475236,-1.2528851527,-0.2861026306
C,0,1.2205475236,-1.2528851527,-0.2861026306
C,0,1.2205475236,1.2528851527,-0.2861026306
C,0,-1.2205475236,1.2528851527,-0.2861026306
C,0,-0.7118017776,1.5182587646,1.0993288119
C,0,0.7118017776,1.5182587646,1.0993288119
C,0,1.2578932301,1.8408845177,2.302592226
C,0,0.7118017776,-1.5182587646,1.0993288119
C,0,-0.7118017776,-1.5182587646,1.0993288119
H,0,2.2952879519,1.9016891208,2.5983941213
C,0,-0.7177871025,2.3239714255,-1.2270048398
C,0,0.7177871025,2.3239714255,-1.2270048398
C,0,-1.2587348163,3.2261995898,-2.0870212711
H,0,-2.2960626002,3.4237353204,-2.3173541476
C,0,-0.7177871025,-2.3239714255,-1.2270048398
C,0,0.7177871025,-2.3239714255,-1.2270048398
C,0,1.2587348163,-3.2261995898,-2.0870212711
H,0,2.2960626002,-3.4237353204,-2.3173541476
C,0,-1.2578932301,-1.8408845177,2.302592226
H,0,-2.2952879519,-1.9016891208,2.5983941213
C,0,-1.5344441639,0,-0.8189596399
H,0,-1.723926123,0,-1.8900156412
C,0,1.5344441639,0,-0.8189596399
H,0,1.723926123,0,-1.8900156412
C,0,1.2587348163,3.2261995898,-2.0870212711
H,0,2.2960626002,3.4237353204,-2.3173541476
C,0,-1.2578932301,1.8408845177,2.302592226
H,0,-2.2952879519,1.9016891208,2.5983941213
C,0,-1.2587348163,-3.2261995898,-2.0870212711
H,0,-2.2960626002,-3.4237353204,-2.3173541476
C,0,1.2578932301,-1.8408845177,2.302592226
H,0,2.2952879519,-1.9016891208,2.5983941213
S,0,0,-2.1507747898,3.4716589347
S,0,0,4.1100980749,-2.9195476584
S,0,0,-4.1100980749,-2.9195476584
S,0,0,2.1507747898,3.4716589347
Bq,0,0,0,-0.463721634
Bq,0,0,0,0.536278366
Bq,0,0,0,-1.463721634
```

Ar = thiophene-3,4-diyl, R<sup>1</sup> = R<sup>2</sup> = H, localised  $\rightleftharpoons$  delocalised TS

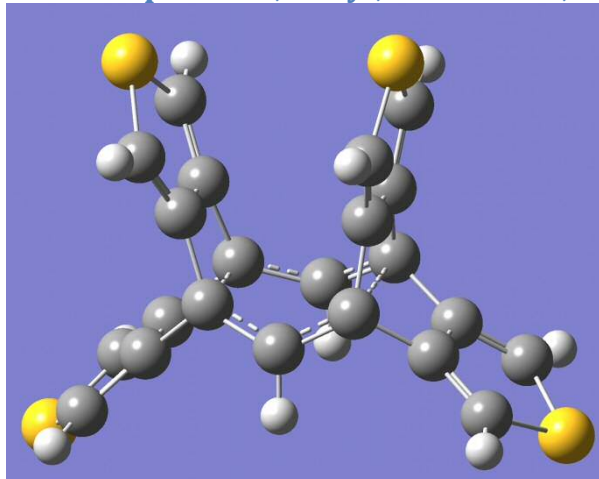

**RB3LYP/6-311+G(d) level:**  
**C<sup>≡</sup>C bond lengths:** 1.90915 Å, 2.52292 Å  
**Electronic energy:** -2437.134616 Hartrees  
**Gibbs free energy:** -2436.940197 Hartrees  
**Imaginary frequency:** 104.8*i* cm<sup>-1</sup>  
**Point group:** C<sub>s</sub>

**UB3LYP/6-311+G(d)//RB3LYP/6-311+G(d) level:**  
**Electronic energy (singlet):** -2437.158508 Hartrees  
**<S<sup>2</sup>> (singlet):** 0.9878  
**Electronic energy (triplet):** -2437.06124 Hartrees  
**<S<sup>2</sup>> (triplet):** 2.0255

**Cartesian coordinates:**

```
C,0,0.3477286985,1.3289928519,1.2614596776
C,0,0.3477286985,1.3289928519,-1.2614596776
C,0,0.307932277,-1.1630376567,-0.9545750057
C,0,0.307932277,-1.1630376567,0.9545750057
C,0,-1.1451971576,-1.5282028866,0.7075323171
C,0,-1.1451971576,-1.5282028866,-0.7075323171
C,0,-2.3103635739,-1.9418414558,-1.2717461992
C,0,-1.0263113559,1.5499387593,-0.7166157444
C,0,-1.0263113559,1.5499387593,0.7166157444
H,0,-2.6111286551,-2.0381316924,-2.3046585597
C,0,1.2318461199,-2.3493030351,0.7090307978
C,0,1.2318461199,-2.3493030351,-0.7090307978
C,0,1.9958217203,-3.3218052983,1.2716652844
H,0,2.2047958176,-3.5588266335,2.3048651339
C,0,1.2584653563,2.4106791331,0.727511444
C,0,1.2584653563,2.4106791331,-0.727511444
C,0,2.0858576822,3.3489273691,-1.2553470704
H,0,2.2925271707,3.567609192,-2.2930790966
C,0,-2.246293122,1.8177822284,1.2540913558
H,0,-2.539971975,1.8754711611,2.2920331761
C,0,0.86677798,0.0918673613,1.4654579319
H,0,1.9380559825,0.0451020579,1.6492461691
C,0,0.86677798,0.0918673613,-1.4654579319
H,0,1.9380559825,0.0451020579,-1.6492461691
C,0,1.9958217203,-3.3218052983,-1.2716652844
H,0,2.2047958176,-3.5588266335,-2.3048651339
C,0,-2.3103635739,-1.9418414558,1.2717461992
H,0,-2.6111286551,-2.0381316924,2.3046585597
C,0,2.0858576822,3.3489273691,1.2553470704
H,0,2.2925271707,3.567609192,2.2930790966
C,0,-2.246293122,1.8177822284,-1.2540913558
H,0,-2.539971975,1.8754711611,-2.2920331761
S,0,-3.4287859756,2.0692440645,0.
S,0,2.7417173057,-4.2686847472,0.
S,0,2.8928856147,4.2546648231,0.
S,0,-3.4498482556,-2.3256663727,0.
```

Ar = pyrrole-3,4-diyl, R<sup>1</sup> = R<sup>2</sup> = H, delocalised structure

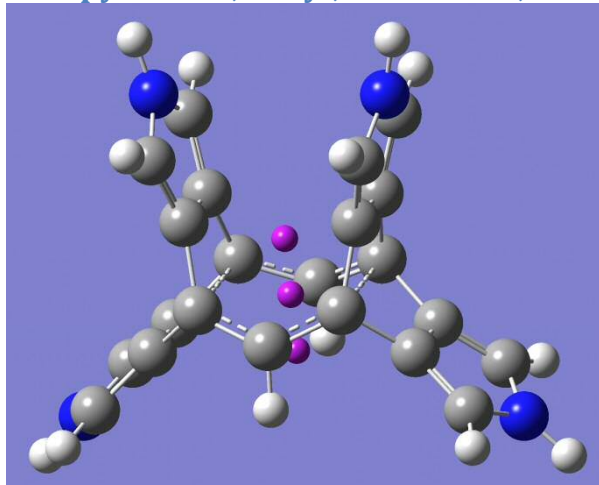

**RB3LYP/6-311+G(d) level:**  
**C<sup>∞</sup>C bond length:** 2.49995 Å  
**Electronic energy:** -1065.726548 Hartrees  
**Gibbs free energy:** -1065.467186 Hartrees  
**No imaginary frequencies**  
**Point group:** C<sub>2v</sub>

**UB3LYP/6-311+G(d)//RB3LYP/6-311+G(d) level:**  
**Electronic energy (singlet):** -1065.756895 Hartrees  
**<S<sup>2</sup>> (singlet):** 1.0634  
**NICS(0):** -3.3994 ppm  
**NICS(1):** -0.8244 ppm  
**NICS(-1):** -3.1432 ppm  
**Isotropic magnetic susceptibility:** -127.6876 cgs-ppm  
**Electronic energy (triplet):** -1065.756693 Hartrees  
**<S<sup>2</sup>> (triplet):** 2.0649

**Cartesian coordinates:**

```
C,0,1.2499761855,1.2601411718,-0.2388555267
C,0,-1.2499761855,1.2601411718,-0.2388555267
C,0,-1.2499761855,-1.2601411718,-0.2388555267
C,0,1.2499761855,-1.2601411718,-0.2388555267
C,0,0.708068076,-1.5086821055,1.1341707218
C,0,-0.708068076,-1.5086821055,1.1341707218
C,0,-1.1376367829,-1.8334711394,2.3957226846
C,0,-0.708068076,1.5086821055,1.1341707218
C,0,0.708068076,1.5086821055,1.1341707218
H,0,-2.1213287693,-1.9243309172,2.8311904959
C,0,0.7131584116,-2.3057684332,-1.1883843636
C,0,-0.7131584116,-2.3057684332,-1.1883843636
C,0,1.1380755955,-3.2749823732,-2.0609939593
H,0,2.122078419,-3.5901513693,-2.3747923829
C,0,0.7131584116,2.3057684332,-1.1883843636
C,0,-0.7131584116,2.3057684332,-1.1883843636
C,0,-1.1380755955,3.2749823732,-2.0609939593
H,0,-2.122078419,3.5901513693,-2.3747923829
C,0,1.1376367829,1.8334711394,2.3957226846
H,0,2.1213287693,1.9243309172,2.8311904959
C,0,1.5501744893,0,-0.7690844112
H,0,1.7369372517,0,-1.8406026134
C,0,-1.5501744893,0,-0.7690844112
H,0,-1.7369372517,0,-1.8406026134
C,0,-1.1380755955,-3.2749823732,-2.0609939593
H,0,-2.122078419,-3.5901513693,-2.3747923829
C,0,1.1376367829,-1.8334711394,2.3957226846
H,0,2.1213287693,-1.9243309172,2.8311904959
C,0,1.1380755955,3.2749823732,-2.0609939593
H,0,2.122078419,3.5901513693,-2.3747923829
C,0,-1.1376367829,1.8334711394,2.3957226846
H,0,-2.1213287693,1.9243309172,2.8311904959
N,0,0,-3.8647709497,-2.588291936
H,0,0,-4.580912534,-3.2944902666
N,0,0,-2.027010455,3.1611335086
H,0,0,-2.2589400613,4.1398221461
N,0,0,2.027010455,3.1611335086
H,0,0,2.2589400613,4.1398221461
N,0,0,3.8647709497,-2.588291936
H,0,0,4.580912534,-3.2944902666
Bq,0,0,0,-0.415598488
Bq,0,0,0,0.584401512
Bq,0,0,0,-1.415598488
```

Ar = furan-3,4-diyl, R<sup>1</sup> = R<sup>2</sup> = H, delocalised structure

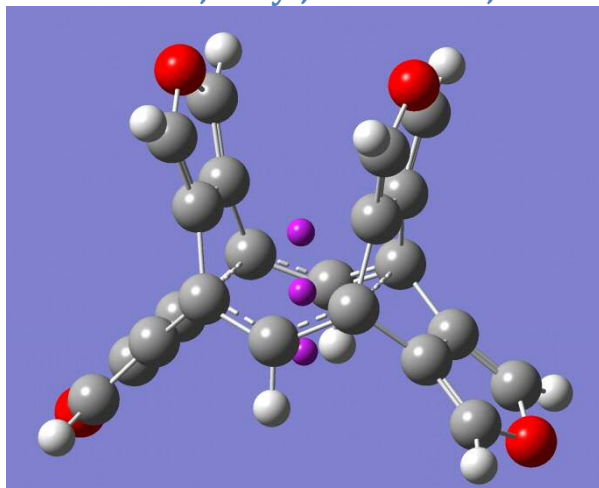

**RB3LYP/6-311+G(d) level:**  
**C<sup>∞</sup>C bond length:** 2.54486 Å  
**Electronic energy:** -1145.172640 Hartrees  
**Gibbs free energy:** -1145.016116 Hartrees  
**No imaginary frequencies**  
**Point group:** C<sub>2v</sub>

**UB3LYP/6-311+G(d)//RB3LYP/6-311+G(d) level:**  
**Electronic energy (singlet):** -1145.208567 Hartrees  
**<S<sup>2</sup>> (singlet):** 1.0699  
**NICS(0):** -4.6707 ppm  
**NICS(1):** -2.1237 ppm  
**NICS(-1):** -3.8957 ppm  
**Isotropic magnetic susceptibility:** -109.2152 cgs-ppm  
**Electronic energy (triplet):** -1145.208434 Hartrees  
**<S<sup>2</sup>> (triplet):** 2.0661

**Cartesian coordinates:**

```
C,0,1.2724307421,1.2570191051,-0.2137488906
C,0,-1.2724307421,1.2570191051,-0.2137488906
C,0,-1.2724307421,-1.2570191051,-0.2137488906
C,0,1.2724307421,-1.2570191051,-0.2137488906
C,0,0.7141095752,-1.4990891486,1.1494302758
C,0,-0.7141095752,-1.4990891486,1.1494302758
C,0,-1.1075783864,-1.7871899502,2.4128769303
C,0,-0.7141095752,1.4990891486,1.1494302758
C,0,0.7141095752,1.4990891486,1.1494302758
H,0,-2.0559097329,-1.8766696533,2.9175495482
C,0,0.7200158669,-2.2877963552,-1.1628510453
C,0,-0.7200158669,-2.2877963552,-1.1628510453
C,0,1.1086252196,-3.2068973578,-2.0775237742
H,0,2.0573518509,-3.5473473233,-2.4603880065
C,0,0.7200158669,2.2877963552,-1.1628510453
C,0,-0.7200158669,2.2877963552,-1.1628510453
H,0,-1.1086252196,3.2068973578,-2.0775237742
H,0,-2.0573518509,3.5473473233,-2.4603880065
C,0,1.1075783864,1.7871899502,2.4128769303
H,0,2.0559097329,1.8766696533,2.9175495482
C,0,1.5886345425,0,-0.7421971104
H,0,1.7909265181,0,-1.8102451529
C,0,-1.5886345425,0,-0.7421971104
H,0,-1.7909265181,0,-1.8102451529
C,0,-1.1086252196,-3.2068973578,-2.0775237742
H,0,-2.0573518509,-3.5473473233,-2.4603880065
C,0,1.1075783864,-1.7871899502,2.4128769303
H,0,2.0559097329,-1.8766696533,2.9175495482
C,0,1.1086252196,3.2068973578,-2.0775237742
H,0,2.0573518509,3.5473473233,-2.4603880065
C,0,-1.1075783864,1.7871899502,2.4128769303
H,0,-2.0559097329,1.8766696533,2.9175495482
O,0,0,-1.9643433292,3.2030839858
O,0,0,-3.7850703037,-2.6477544413
O,0,0,1.9643433292,3.2030839858
O,0,0,3.7850703037,-2.6477544413
Bq,0,0,0,-0.389898297
Bq,0,0,0,0.610101703
Bq,0,0,0,-1.389898297
```



Diazaderivative, Ar = benzene-1,2-diyl, R<sup>1</sup> = R<sup>2</sup> = -, localised structure

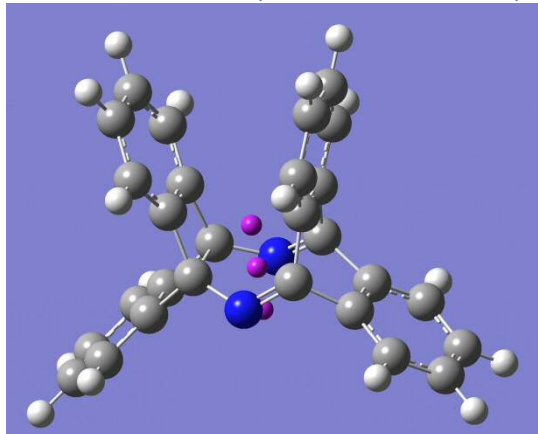

**RB3LYP/6-311+G(d) level:**  
**Allyl-allyl C–C bond length:** 1.75449 Å  
**Distance between terminal allyl C atoms:**  
2.36523 Å  
**Sum of bond angles for terminal allyl C:**  
352.908 Å  
**Electronic energy:** -1186.177220 Hartrees  
**Gibbs free energy:** -1185.873497 Hartrees  
**No imaginary frequencies**  
**Point group:** *C<sub>s</sub>*

**UB3LYP/6-311+G(d)//RB3LYP/6-311+G(d) level:**  
**Electronic energy (singlet):** -1186.177220 Hartrees  
**<S<sup>2</sup>> (singlet):** 0.0000  
**NICS(0):** -6.2368 ppm  
**NICS(1):** 0.6406 ppm  
**NICS(-1):** -5.1293 ppm  
**Isotropic magnetic susceptibility:** -140.6809 cgs-ppm

**Cartesian coordinates:**

```
C,0,0.1676688693,1.2794674433,1.1826143389
C,0,0.1676688693,1.2794674433,-1.1826143389
C,0,0.4494182114,-1.0473187162,-0.8772468416
C,0,0.4494182114,-1.0473187162,0.8772468416
C,0,-0.9558633916,-1.6367126059,0.69691672
C,0,-0.9558633916,-1.6367126059,-0.69691672
C,0,-1.9784300741,-2.2112246843,-1.4324703309
C,0,-3.0327847595,-2.7753798134,0.6993041622
C,0,-3.0327847595,-2.7753798134,-0.6993041622
H,0,-3.8663965313,-3.2290011184,1.226476956
H,0,-3.8663965313,-3.2290011184,-1.226476956
C,0,-1.2612333263,1.3510245847,-0.6999468506
C,0,-1.2612333263,1.3510245847,0.6999468506
C,0,-2.4444489044,1.4811253809,-1.4110307482
C,0,-3.6411313952,1.608144449,-0.6969085917
C,0,-3.6411313952,1.608144449,0.6969085917
H,0,-4.5783424856,1.7099013204,-1.2344153258
H,0,-4.5783424856,1.7099013204,1.2344153258
H,0,-1.9837988625,-2.227961986,-2.5177534667
H,0,-2.4462144151,1.4828842265,-2.4964164429
C,0,1.5484548091,-2.0950574862,0.6964236962
C,0,1.5484548091,-2.0950574862,-0.6964236962
C,0,2.3852049671,-2.9133914223,1.4334334307
C,0,2.3852049671,-2.9133914223,-1.4334334307
C,0,3.2437091843,-3.7463638793,0.6990804379
H,0,2.4060378821,-2.9075776402,2.5184545207
C,0,3.2437091843,-3.7463638793,-0.6990804379
H,0,2.4060378821,-2.9075776402,-2.5184545207
H,0,3.9306513727,-4.4013191179,1.2261136397
H,0,3.9306513727,-4.4013191179,-1.2261136397
C,0,0.9297479841,2.5133953133,0.7098008412
C,0,1.5909106275,3.5064624305,1.4101797513
C,0,0.9297479841,2.5133953133,-0.7098008412
C,0,2.2528025211,4.5144636915,0.6956459393
H,0,1.6105334928,3.4961399626,2.4951836164
C,0,1.5909106275,3.5064624305,-1.4101797513
C,0,2.2528025211,4.5144636915,-0.6956459393
H,0,2.7737391755,5.2990111057,1.234984544
H,0,1.6105334928,3.4961399626,-2.4951836164
H,0,2.7737391755,5.2990111057,-1.234984544
C,0,-1.9784300741,-2.2112246843,1.4324703309
H,0,-1.9837988625,-2.227961986,2.5177534667
C,0,-2.4444489044,1.4811253809,1.4110307482
H,0,-2.4462144151,1.4828842265,2.4964164429
N,0,0.8580950131,0.2132527032,1.3769386088
N,0,0.8580950131,0.2132527032,-1.3769386088
Bq,0,0.491727365,0.148467143,0.
Bq,0,-0.501545758,0.03267205,0.
Bq,0,1.485000487,0.264262237,0.
```

**Diazaderivative, Ar = benzene-1,2-diyl, R<sup>1</sup> = R<sup>2</sup> = -, delocalised structure**

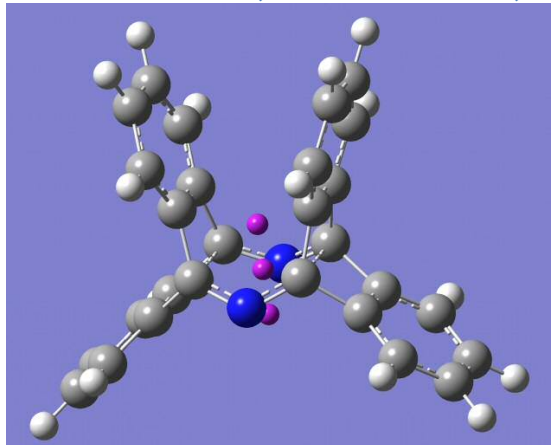

**RB3LYP/6-311+G(d) level:**  
**C<sup>≡</sup>C bond length:** 2.20491 Å  
**Electronic energy:** -1186.174768 Hartrees  
**Gibbs free energy:** -1185.872330 Hartrees  
**No imaginary frequencies**  
**Point group:** C<sub>2v</sub>

**UB3LYP/6-311+G(d)//RB3LYP/6-311+G(d) level:**  
**Electronic energy (singlet):** -1186.174965 Hartrees  
**<S<sup>2</sup>> (singlet):** 0.0777  
**NICS(0):** -10.8860 ppm  
**NICS(1):** -0.7230 ppm  
**NICS(-1):** -6.9455 ppm  
**Isotropic magnetic susceptibility:** -147.1611 cgs-ppm  
**Electronic energy (triplet):** -1186.139607 Hartrees  
**<S<sup>2</sup>> (triplet):** 2.0537

**Cartesian coordinates:**

```
C,0,-1.1771873711,1.1024551098,-0.3107305384
C,0,-1.1771873711,-1.1024551098,-0.3107305384
C,0,1.1771873711,-1.1024551098,-0.3107305384
C,0,1.1771873711,1.1024551098,-0.3107305384
C,0,1.491524373,0.6964805695,1.1176484074
C,0,1.491524373,-0.6964805695,1.1176484074
C,0,1.8452858748,-1.4185241782,2.2470829912
C,0,2.193307255,0.6978143198,3.3967170775
C,0,2.193307255,-0.6978143198,3.3967170775
H,0,2.4701307184,1.231429066,4.3004074515
H,0,2.4701307184,-1.231429066,4.3004074515
C,0,-1.491524373,-0.6964805695,1.1176484074
C,0,-1.491524373,0.6964805695,1.1176484074
C,0,-1.8452858748,-1.4185241782,2.2470829912
C,0,-2.193307255,-0.6978143198,3.3967170775
C,0,-2.193307255,0.6978143198,3.3967170775
H,0,-2.4701307184,-1.231429066,4.3004074515
H,0,-2.4701307184,1.231429066,4.3004074515
H,0,1.8499027347,-2.5041299291,2.2499719233
H,0,-1.8499027347,-2.5041299291,2.2499719233
C,0,2.3014432389,0.7006480105,-1.2566168085
C,0,2.3014432389,-0.7006480105,-1.2566168085
C,0,3.195422111,1.4185153075,-2.0317594234
C,0,3.195422111,-1.4185153075,-2.0317594234
C,0,4.1058393637,0.696920568,-2.8181168976
H,0,3.1804987048,2.5036690983,-2.0535612138
C,0,4.1058393637,-0.696920568,-2.8181168976
H,0,3.1804987048,-2.5036690983,-2.0535612138
H,0,4.814547854,1.2314815606,-3.4426851776
H,0,4.814547854,-1.2314815606,-3.4426851776
C,0,-2.3014432389,0.7006480105,-1.2566168085
C,0,-3.195422111,1.4185153075,-2.0317594234
C,0,-2.3014432389,-0.7006480105,-1.2566168085
C,0,-4.1058393637,0.696920568,-2.8181168976
H,0,-3.1804987048,2.5036690983,-2.0535612138
C,0,-3.195422111,-1.4185153075,-2.0317594234
C,0,-4.1058393637,-0.696920568,-2.8181168976
H,0,-4.814547854,1.2314815606,-3.4426851776
H,0,-3.1804987048,-2.5036690983,-2.0535612138
H,0,-4.814547854,-1.2314815606,-3.4426851776
C,0,1.8452858748,1.4185241782,2.2470829912
H,0,1.8499027347,2.5041299291,2.2499719233
C,0,-1.8452858748,1.4185241782,2.2470829912
H,0,-1.8499027347,2.5041299291,2.2499719233
N,0,0.,1.3861291178,-0.8564330631
N,0,0.,-1.3861291178,-0.8564330631
Bq,0,0.,0.,-0.49263138
Bq,0,0.,0.,0.50736862
Bq,0,0.,0.,-1.49263138
```

Diazaderivative, Ar = benzene-1,2-diyl, R<sup>1</sup> = R<sup>2</sup> = -, localised  $\rightleftharpoons$  delocalised TS

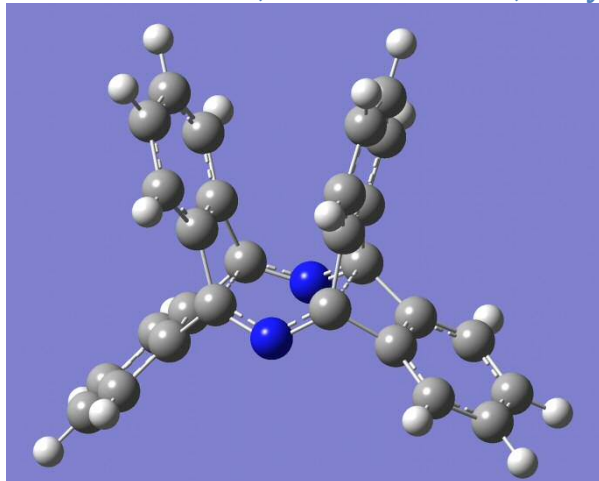

**RB3LYP/6-311+G(d) level:**  
**C<sup>≡</sup>C bond lengths:** 2.12399 Å, 2.26079 Å  
**Electronic energy:** -1186.174739 Hartrees  
**Gibbs free energy:** -1185.872147 Hartrees  
**Imaginary frequency:** 113.3*i* cm<sup>-1</sup>  
**Point group:** C<sub>s</sub>

**UB3LYP/6-311+G(d)//RB3LYP/6-311+G(d) level:**  
**Electronic energy (singlet):** -1186.174965 Hartrees  
**<S<sup>2</sup>> (singlet):** 0.0777  
**Electronic energy (triplet):** -1186.133714 Hartrees  
**<S<sup>2</sup>> (triplet):** 2.0518

**Cartesian coordinates:**

```
C,0,0.2274987768,1.2042358084,1.1303941268
C,0,0.2274987768,1.2042358084,-1.1303941268
C,0,0.3725523111,-1.1444923094,-1.061996944
C,0,0.3725523111,-1.1444923094,1.061996944
C,0,-1.040715594,-1.567263438,0.6959138382
C,0,-1.040715594,-1.567263438,-0.6959138382
C,0,-2.1367370718,-2.0071842705,-1.4216017033
C,0,-3.2552051793,-2.4420345927,0.6981311681
C,0,-3.2552051793,-2.4420345927,-0.6981311681
H,0,-4.1357105061,-2.7878855322,1.2303157993
H,0,-4.1357105061,-2.7878855322,-1.2303157993
C,0,-1.210626628,1.4125045562,-0.6971763943
C,0,-1.210626628,1.4125045562,0.6971763943
C,0,-2.3658328394,1.678980142,-1.4161709872
C,0,-3.5393153492,1.9390755397,-0.6975731168
C,0,-3.5393153492,1.9390755397,0.6975731168
H,0,-4.4607135276,2.1465612381,-1.2322994863
H,0,-4.4607135276,2.1465612381,1.2322994863
H,0,-2.1405323362,-2.012929529,-2.507157592
H,0,-2.3681023657,1.6832246917,-2.5017790349
C,0,1.3910838376,-2.2166143664,0.6990999715
C,0,1.3910838376,-2.2166143664,-0.6990999715
C,0,2.2122771271,-3.064359679,1.4216871678
C,0,2.2122771271,-3.064359679,-1.4216871678
C,0,3.0477163732,-3.9280883989,0.697336181
H,0,2.2339086112,-3.0493702198,2.5068018705
C,0,3.0477163732,-3.9280883989,-0.697336181
H,0,2.2339086112,-3.0493702198,-2.5068018705
H,0,3.7123019117,-4.6007821224,1.2302551757
H,0,3.7123019117,-4.6007821224,-1.2302551757
C,0,1.0955553742,2.3815267455,0.7023705433
C,0,1.8172582225,3.3223404245,1.4160489063
C,0,1.0955553742,2.3815267455,-0.7023705433
C,0,2.5474023875,4.2796424797,0.6966034679
H,0,1.8389572927,3.3085931443,2.5012221836
C,0,1.8172582225,3.3223404245,-1.4160489063
C,0,2.5474023875,4.2796424797,-0.6966034679
H,0,3.1264485537,5.025015316,1.232484193
H,0,1.8389572927,3.3085931443,-2.5012221836
H,0,3.1264485537,5.025015316,-1.232484193
C,0,-2.1367370718,-2.0071842705,1.4216017033
H,0,-2.1405323362,-2.012929529,2.507157592
C,0,-2.3658328394,1.678980142,1.4161709872
H,0,-2.3681023657,1.6832246917,2.5017790349
N,0,0.8447046399,0.0703595656,1.3845844113
N,0,0.8447046399,0.0703595656,-1.3845844113
```

Azaderivative, Ar = furan-3,4-diyl, R<sup>1</sup> = -, R<sup>2</sup> = H, delocalised structure

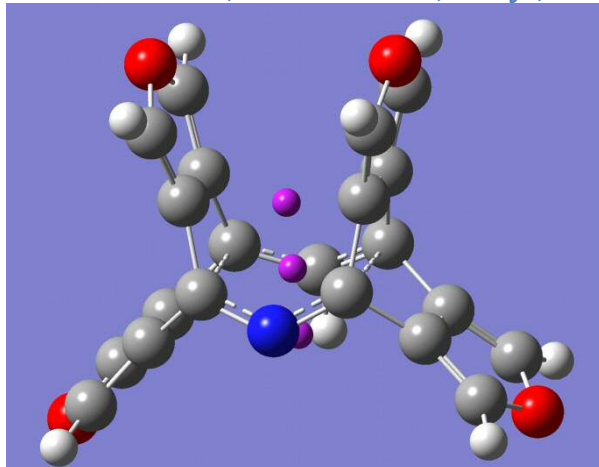

**RB3LYP/6-311+G(d) level:**  
**C<sup>≡</sup>C bond length:** 2.48888 Å  
**Electronic energy:** -1161.207209 Hartrees  
**Gibbs free energy:** -1161.008440 Hartrees  
**No imaginary frequencies**  
**Point group:** C<sub>s</sub>

**UB3LYP/6-311+G(d)//RB3LYP/6-311+G(d) level:**  
**Electronic energy (singlet):** -1161.236655 Hartrees  
**<S<sup>2</sup>> (singlet):** 1.0570  
**NICS(0):** -3.5243 ppm  
**NICS(1):** -2.3474 ppm  
**NICS(-1):** -3.5716 ppm  
**Isotropic magnetic susceptibility:** -112.8256 cgs-ppm  
**SCF convergence not achieved for triplet UB3LYP wavefunction.**

**Cartesian coordinates:**

```
C,0,1.2269819908,1.1868357428,-0.2358796809
C,0,-1.2610353352,1.2497757256,-0.2180266873
C,0,-1.2610353352,-1.2497757256,-0.2180266873
C,0,1.2269819908,-1.1868357428,-0.2358796809
C,0,0.7128890616,-1.4721181453,1.1505641807
C,0,-0.7146871994,-1.4912402514,1.1509772924
C,0,-1.1064487783,-1.8134010247,2.4070356611
C,0,-0.7146871994,1.4912402514,1.1509772924
C,0,0.7128890616,1.4721181453,1.1505641807
H,0,-2.0531612974,-1.9326307752,2.9084928871
C,0,0.7234286543,-2.2562535783,-1.1758074204
C,0,-0.7141344239,-2.283152394,-1.168605839
C,0,1.1244811273,-3.1803705981,-2.0771208731
H,0,2.0759238867,-3.5045754761,-2.466194003
C,0,0.7234286543,2.2562535783,-1.1758074204
C,0,-0.7141344239,2.283152394,-1.168605839
C,0,-1.0942323178,3.2186047384,-2.0707898719
H,0,-2.0380746313,3.582464832,-2.443793444
C,0,1.1104445994,1.7899113783,2.4045072816
H,0,2.0585471733,1.8842949226,2.9085099357
C,0,-1.6037022443,0,-0.7465172771
H,0,-1.8076217784,0,-1.8134271884
C,0,-1.0942323178,-3.2186047384,-2.0707898719
H,0,-2.0380746313,-3.582464832,-2.443793444
C,0,1.1104445994,-1.7899113783,2.4045072816
H,0,2.0585471733,-1.8842949226,2.9085099357
C,0,1.1244811273,3.1803705981,-2.0771208731
H,0,2.0759238867,3.5045754761,-2.466194003
C,0,-1.1064487783,1.8134010247,2.4070356611
H,0,-2.0531612974,1.9326307752,2.9084928871
O,0,0.0036780574,-1.9955785765,3.1903067722
O,0,0.0220475103,-3.7843059363,-2.6341661439
O,0,0.0036780574,1.9955785765,3.1903067722
O,0,0.0220475103,3.7843059363,-2.6341661439
N,0,1.4671008673,0,-0.7802716323
Bq,0,-0.0328341,0,-0.22683976
Bq,0,-0.02665034,0,0.86692582
Bq,0,-0.03901786,0,-1.32060533
```

## Diazaderivative, Ar = furan-3,4-diyl, R<sup>1</sup> = R<sup>2</sup> = -, localised structure

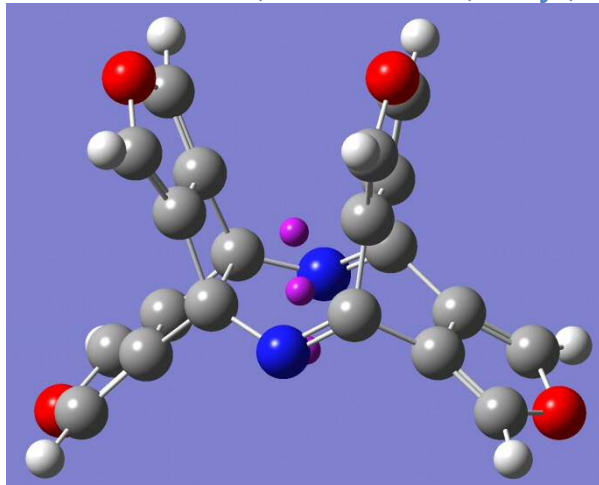

**RB3LYP/6-311+G(d) level:**  
**Allyl-allyl C–C bond length:** 1.81371 Å  
**Distance between terminal allyl C atoms:** 2.48414 Å  
**Sum of bond angles for terminal azaallyl C:** 350.258°  
**Electronic energy:** -1177.235771 Hartrees  
**Gibbs free energy:** -1177.048379 Hartrees  
**No imaginary frequencies**  
**Point group:** C<sub>s</sub>

**UB3LYP/6-311+G(d)//RB3LYP/6-311+G(d) level:**  
**Electronic energy (singlet):** -1177.235771 Hartrees  
**<S<sup>2</sup>> (singlet):** 0.0000  
**NICS(0):** -3.8005 ppm  
**NICS(1):** 1.2497 ppm  
**NICS(-1):** -2.8549 ppm  
**Isotropic magnetic susceptibility:** -83.6701 cgs-ppm

### Cartesian coordinates:

```
C,0,0.1925180585,1.2648347407,1.242071977
C,0,0.1925180585,1.2648347407,-1.242071977
C,0,0.3454308895,-1.0718294756,-0.9068531734
C,0,0.3454308895,-1.0718294756,0.9068531734
C,0,-1.0859750849,-1.5723728205,0.7115453028
C,0,-1.0859750849,-1.5723728205,-0.7115453028
C,0,-2.2469670007,-2.1354195082,-1.1187655791
C,0,-1.2071493966,1.3983845775,-0.7191688205
C,0,-1.2071493966,1.3983845775,0.7191688205
H,0,-2.7262619751,-2.3548434043,-2.0583665689
C,0,1.3682651026,-2.1805327024,0.7106574778
C,0,1.3682651026,-2.1805327024,-0.7106574778
C,0,2.2344467049,-3.1346086783,1.1194549126
H,0,2.6078181148,-3.505648515,-2.0593273886
C,0,0.9967358683,2.439455413,0.7305838447
C,0,0.9967358683,2.439455413,-0.7305838447
C,0,1.7574578213,3.4886203569,-1.1076534235
H,0,2.0720066336,3.8901090281,-2.0566133547
C,0,-2.4883257932,1.5899324039,1.1061062013
H,0,-2.9931485852,1.6566595529,2.0554829118
C,0,2.2344467049,-3.1346086783,-1.1194549126
H,0,2.6078181148,-3.505648515,-2.0593273886
C,0,-2.2469670007,-2.1354195082,1.1187655791
H,0,-2.7262619751,-2.3548434043,2.0583665689
C,0,1.7574578213,3.4886203569,1.1076534235
H,0,2.0720066336,3.8901090281,2.0566133547
C,0,-2.4883257932,1.5899324039,-1.1061062013
H,0,-2.9931485852,1.6566595529,-2.0554829118
O,0,2.7767790774,-3.7252933655,0.
O,0,-2.9783286533,-2.4643132223,0.
O,0,-3.2870305489,1.7011674665,0.
O,0,2.2309463359,4.1415860564,0.
N,0,0.8263630262,0.1602470382,1.4068568126
N,0,0.8263630262,0.1602470382,-1.4068568126
Bq,0,0.454770658,0.117750768,0.
Bq,0,-0.543348986,0.056454955,0.
Bq,0,1.452890302,0.17904658,0.
```

Diazaderivative, Ar = furan-3,4-diyl, R<sup>1</sup> = R<sup>2</sup> = -, delocalised structure

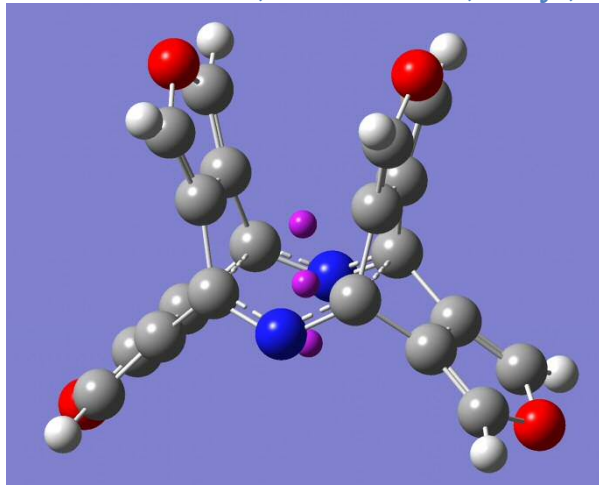

**RB3LYP/6-311+G(d) level:**  
**C-C bond length:** 2.42377 Å  
**Electronic energy:** -1177.239646 Hartrees  
**Gibbs free energy:** -1177.052693 Hartrees  
**No imaginary frequencies**  
**Point group:** C<sub>2v</sub>

**UB3LYP/6-311+G(d)//RB3LYP/6-311+G(d) level:**  
**Electronic energy (singlet):** -1177.262602 Hartrees  
**<S<sup>2</sup>> (singlet):** 1.0101  
**NICS(0):** -4.7020 ppm  
**NICS(1):** -0.6396 ppm  
**NICS(-1):** -3.2132 ppm  
**Isotropic magnetic susceptibility:** -103.9644 cgs-ppm  
**Electronic energy (triplet):** -1177.260914 Hartrees  
**<S<sup>2</sup>> (triplet):** 2.0575

**Cartesian coordinates:**

```
C,0,1.2118853639,1.1810331481,-0.2358606793
C,0,-1.2118853639,1.1810331481,-0.2358606793
C,0,-1.2118853639,-1.1810331481,-0.2358606793
C,0,1.2118853639,-1.1810331481,-0.2358606793
C,0,0.7133525847,-1.4652271855,1.157192437
C,0,-0.7133525847,-1.4652271855,1.157192437
C,0,-1.1094635439,-1.8159960819,2.4031394499
C,0,-0.7133525847,1.4652271855,1.157192437
C,0,0.7133525847,1.4652271855,1.157192437
H,0,-2.0561684285,-1.9394249323,2.9033072566
C,0,0.7181165607,-2.2545999644,-1.1770828032
C,0,-0.7181165607,-2.2545999644,-1.1770828032
C,0,1.1104976678,-3.195229845,-2.0655109143
H,0,2.057573723,-3.5426354625,-2.4447574157
C,0,0.7181165607,2.2545999644,-1.1770828032
C,0,-0.7181165607,2.2545999644,-1.1770828032
C,0,-1.1104976678,3.195229845,-2.0655109143
H,0,-2.057573723,3.5426354625,-2.4447574157
C,0,1.1094635439,1.8159960819,2.4031394499
H,0,2.0561684285,1.9394249323,2.9033072566
C,0,-1.1104976678,-3.195229845,-2.0655109143
H,0,-2.057573723,-3.5426354625,-2.4447574157
C,0,1.1094635439,-1.8159960819,2.4031394499
H,0,2.0561684285,-1.9394249323,2.9033072566
C,0,1.1104976678,3.195229845,-2.0655109143
H,0,2.057573723,3.5426354625,-2.4447574157
C,0,-1.1094635439,1.8159960819,2.4031394499
H,0,-2.0561684285,1.9394249323,2.9033072566
O,0,0,-2.0256218819,3.1819255483
O,0,0,-3.786528562,-2.6157492822
O,0,0,2.0256218819,3.1819255483
O,0,0,3.786528562,-2.6157492822
N,0,1.482726113,0,-0.7797548977
N,0,-1.482726113,0,-0.7797548977
Bq,0,0,0,-0.417158752
Bq,0,0,0,0.582841248
Bq,0,0,0,-1.417158752
```

Diazaderivative, Ar = furan-3,4-diyl,  $R^1 = R^2 = -$ , localised  $\rightleftharpoons$  delocalised TS

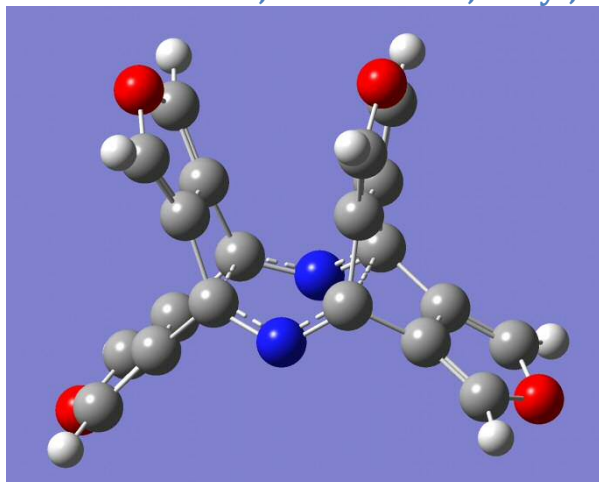

**RB3LYP/6-311+G(d) level:**  
**C<sup>≡</sup>C bond lengths:** 1.96865 Å, 2.47414 Å  
**Electronic energy:** -1177.235432 Hartrees  
**Gibbs free energy:** -1177.048552 Hartrees  
**Imaginary frequency:** 247.3*i* cm<sup>-1</sup>  
**Point group:** *C<sub>s</sub>*

**UB3LYP/6-311+G(d)//RB3LYP/6-311+G(d) level:**  
**Electronic energy (singlet):** -1177.235432 Hartrees  
**<S<sup>2</sup>> (singlet):** 0.0000  
**Electronic energy (triplet):** -1177.181762 Hartrees  
**<S<sup>2</sup>> (triplet):** 2.0333

**Cartesian coordinates:**

```
C,0,0.2034098247,1.2462224683,1.2370684134
C,0,0.2034098247,1.2462224683,-1.2370684134
C,0,0.3458253214,-1.0955224434,-0.9843248002
C,0,0.3458253214,-1.0955224434,0.9843248002
C,0,-1.0755133271,-1.5615969999,0.7106593048
C,0,-1.0755133271,-1.5615969999,-0.7106593048
C,0,-2.2551455165,-2.0859333886,-1.1171995492
C,0,-1.1982732988,1.3996242185,-0.7175377459
C,0,-1.1982732988,1.3996242185,0.7175377459
H,0,-2.7407859533,-2.2851371634,-2.0581676883
C,0,1.3591617939,-2.1889939484,0.7111208787
C,0,1.3591617939,-2.1889939484,-0.7111208787
C,0,2.2404537197,-3.1303569991,1.1178127468
H,0,2.6211409803,-3.490602718,2.0591038754
C,0,1.0291070647,2.4074405737,0.7268321824
C,0,1.0291070647,2.4074405737,-0.7268321824
C,0,1.8067145716,3.4433109517,-1.1084056582
H,0,2.1313587865,3.8380849066,-2.0568989083
C,0,-2.4749299392,1.6173782614,1.1068876473
H,0,-2.9798668394,1.6939203861,2.055611439
C,0,2.2404537197,-3.1303569991,-1.1178127468
H,0,2.6211409803,-3.490602718,-2.0591038754
C,0,-2.2551455165,-2.0859333886,1.1171995492
H,0,-2.7407859533,-2.2851371634,2.0581676883
C,0,1.8067145716,3.4433109517,1.1084056582
H,0,2.1313587865,3.8380849066,2.0568989083
C,0,-2.4749299392,1.6173782614,-1.1068876473
H,0,-2.9798668394,1.6939203861,-2.055611439
O,0,2.7904116143,-3.7153862072,0.
O,0,-2.9960713856,-2.3939725649,0.
O,0,-3.2714091013,1.7442278935,0.
O,0,2.2906101022,4.0888626279,0.
N,0,0.8256271896,0.1289600273,1.4213204597
N,0,0.8256271896,0.1289600273,-1.4213204597
```

## Bisethanosemibullvalene, delocalised structure

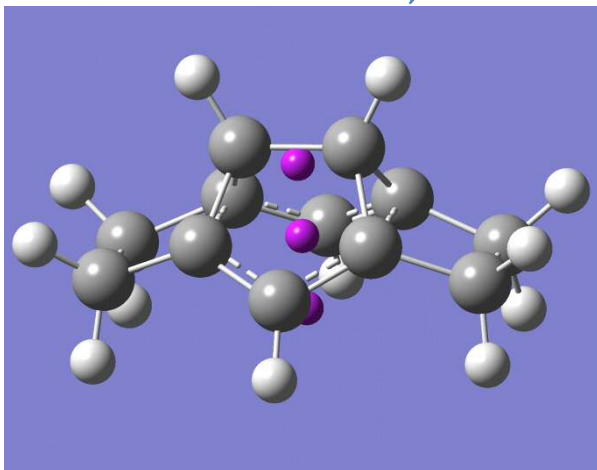

**RB3LYP/6-311+G(d) level:**  
**C<sup>∞</sup>C bond length:** 2.05339 Å  
**Electronic energy:** -464.475021 Hartrees  
**Gibbs free energy:** -464.303564 Hartrees  
**No imaginary frequencies**  
**Point group:**  $C_{2v}$

**UB3LYP/6-311+G(d)//RB3LYP/6-311+G(d) level:**  
**Electronic energy (singlet):** -464.475021 Hartrees  
 **$\langle S^2 \rangle$  (singlet):** 0.0000  
**NICS(0):** -18.6176 ppm  
**NICS(1):** -44.0539 ppm  
**NICS(-1):** -10.7924 ppm  
**Isotropic magnetic susceptibility:** -102.3801 cgs-ppm  
**Electronic energy (triplet):** -464.411842 Hartrees  
 **$\langle S^2 \rangle$  (triplet):** 2.0520

### Cartesian coordinates:

```
C,0,0.,0.7661955499,1.189435542
C,0,0.,-0.7661955499,1.189435542
H,0,0.,1.2858266188,2.1500031003
H,0,0.,-1.2858266188,2.1500031003
C,0,-1.5814943505,0.,-0.414043256
C,0,1.5814943505,0.,-0.414043256
H,0,2.1786466339,0.,-1.320911332
H,0,-2.1786466339,0.,-1.320911332
C,0,-1.0266929298,1.1468556815,0.1517614946
C,0,-1.0266929298,-1.1468556815,0.1517614946
C,0,1.0266929298,-1.1468556815,0.1517614946
C,0,1.0266929298,1.1468556815,0.1517614946
C,0,0.7812236666,-2.5392425585,-0.4041323276
H,0,1.2179667621,-3.3335843944,0.215388364
H,0,1.1792857897,-2.6595291471,-1.4139178109
C,0,0.7812236666,2.5392425585,-0.4041323276
H,0,1.2179667621,3.3335843944,0.215388364
H,0,1.1792857897,2.6595291471,-1.4139178109
C,0,-0.7812236666,2.5392425585,-0.4041323276
H,0,-1.1792857897,2.6595291471,-1.4139178109
H,0,-1.2179667621,3.3335843944,0.215388364
C,0,-0.7812236666,-2.5392425585,-0.4041323276
H,0,-1.1792857897,-2.6595291471,-1.4139178109
H,0,-1.2179667621,-3.3335843944,0.215388364
Bq,0,0.,0.,-0.036840089
Bq,0,0.,0.,0.963159911
Bq,0,0.,0.,-1.036840089
```



## Tetra(methylene)bis(allyl), delocalised structure

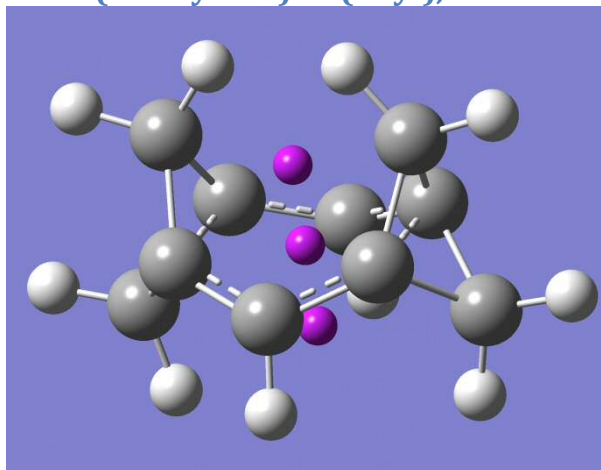

**RB3LYP/6-311+G(d) level:**  
**C<sup>∞</sup>C bond length:** 1.77332 Å  
**Electronic energy:** -386.923824 Hartrees  
**Gibbs free energy:** -386.786481 Hartrees  
**No imaginary frequencies**  
**Point group:**  $C_{2v}$

**UB3LYP/6-311+G(d)//RB3LYP/6-311+G(d) level:**  
**Electronic energy (singlet):** -386.923824 Hartrees  
 **$\langle S^2 \rangle$  (singlet):** 0.0000  
**NICS(0):** -16.0021 ppm  
**NICS(1):** -6.4935 ppm  
**NICS(-1):** -10.5419 ppm  
**Isotropic magnetic susceptibility:** -91.1144 cgs-ppm  
**Electronic energy (triplet):** -386.824367 Hartrees  
 **$\langle S^2 \rangle$  (triplet):** 2.0155

### Cartesian coordinates:

```
C,0,-1.3699055846,0,-0.4044824811
C,0,1.3699055846,0,-0.4044824811
C,0,0.8866621897,-1.2409062072,0.0476836578
C,0,-0.8866621897,-1.2409062072,0.0476836578
H,0,1.6748365568,0,-1.4502301782
C,0,0.8866621897,1.2409062072,0.0476836578
C,0,0,-2.1004315121,-0.8705389469
C,0,0,-1.5004429356,1.2475119053
C,0,-0.8866621897,1.2409062072,0.0476836578
H,0,-1.6748365568,0,-1.4502301782
C,0,0,-2.1004315121,-0.8705389469
C,0,0,1.5004429356,1.2475119053
H,0,0,1.8616658695,-1.9330318066
H,0,0,3.176038863,-0.6829762517
H,0,0,0.8560071248,2.1109722299
H,0,0,2.549474229,1.5547035066
H,0,0,-1.8616658695,-1.9330318066
H,0,0,-3.176038863,-0.6829762517
H,0,0,-0.8560071248,2.1109722299
H,0,0,-2.549474229,1.5547035066
Bq,0,0,0,-0.103038389
Bq,0,0,0,0.896961611
Bq,0,0,0,-1.103038389
```

## Tetra(ethylene)bis(allyl), localised structure

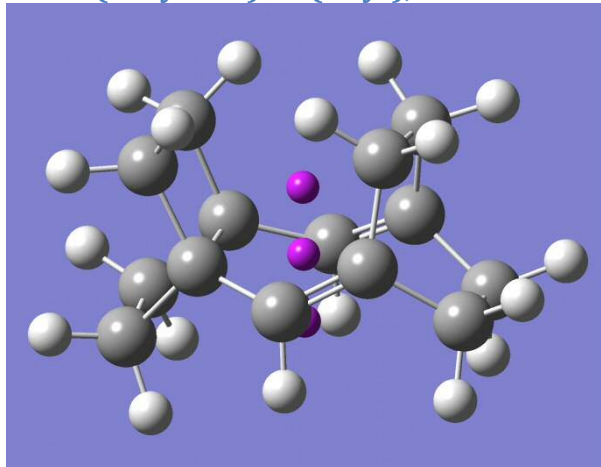

**RB3LYP/6-311+G(d) level:**  
**Electronic energy:** -544.292422 Hartrees  
**Gibbs free energy:** -544.043458 Hartrees  
**No imaginary frequencies**  
**Point group:**  $C_1$

**UB3LYP/6-311+G(d)//RB3LYP/6-311+G(d) level:**  
**Electronic energy (singlet):** -544.292422 Hartrees  
 **$\langle S^2 \rangle$  (singlet):** 0.0000  
**NICS(0):** -2.8446 ppm  
**NICS(1):** -2.8022 ppm  
**NICS(-1):** -0.0977 ppm  
**Isotropic magnetic susceptibility:** -105.8671 cgs-ppm

### Cartesian coordinates:

```
C,0,-0.0603599301,-0.5671932649,-1.4235554957
C,0,-0.0596612105,-0.590271343,1.3929351841
C,0,-1.3093983305,-0.1117106104,1.2196815739
C,0,-1.2767807288,-0.0265971215,-1.204864267
H,0,-0.0006281458,-1.6695119894,1.5472279549
C,0,1.2141445126,-0.0411609646,0.8328970084
C,0,-1.6421029458,1.3143865099,0.8393580663
C,0,-2.4494120401,-0.9264237955,-0.8382907837
C,0,-2.4171816781,-1.0503768088,0.7626962419
C,0,-1.5104537762,1.3891286291,-0.72262397
C,0,1.2372819841,-0.1098671823,-0.8329041639
H,0,-0.0613650678,-1.6311613377,-1.6661194759
H,0,-3.4084615671,-0.5102940952,-1.1644213988
H,0,-2.3510045185,-1.9182312109,-1.2850416007
H,0,-3.3953075214,-0.7879039745,1.1799497298
H,0,-2.2013887857,-2.0836749682,1.0434565581
H,0,-0.7099700557,2.0630718661,-1.0164716835
H,0,-2.4286054641,1.7855000737,-1.1700404047
H,0,-1.0049149632,2.0442038656,1.3337755142
H,0,-2.6670138658,1.5416851612,1.1501196237
C,0,2.3708991346,-1.1606979846,-0.7270659244
C,0,2.4365291413,-1.0045984889,0.8195496918
C,0,1.7971588657,1.3436480143,-0.8171146933
C,0,1.6521594896,1.4444615962,0.7308290504
H,0,2.2701968429,-1.9358116156,1.3660471097
H,0,3.3575880321,-0.5557891356,1.2015864235
H,0,2.044430394,-2.1589440774,-1.0300785946
H,0,3.2843173393,-0.92355995,-1.2808533061
H,0,0.8968617173,2.1628559555,1.0399852475
H,0,2.5676967243,1.6761464387,1.2829262625
H,0,1.2217894158,2.0749875016,-1.3821801496
H,0,2.8272044815,1.3947539972,-1.1813952988
Bq,0,-0.042462284,-0.241133414,-0.002635027
Bq,0,0.061761044,-1.233294557,0.066312521
Bq,0,-0.146685612,0.751027728,-0.071582575
```

## Tetra(ethylene)bis(allyl), delocalised structure

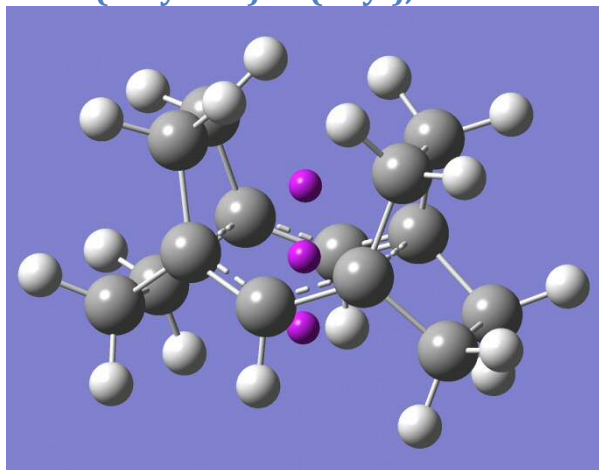

**RB3LYP/6-311+G(d) level:**  
**C<sup>∞</sup>C bond length:** 2.15694 Å  
**Electronic energy:** -544.279219 Hartrees  
**Gibbs free energy:** -544.030120 Hartrees  
**Imaginary frequency:** 376.1i cm<sup>-1</sup>  
**Point group:** C<sub>2</sub>

**UB3LYP/6-311+G(d)//RB3LYP/6-311+G(d) level:**  
**Electronic energy (singlet):** -544.2792223 Hartrees  
**<S<sup>2</sup>> (singlet):** 0.0000  
**NICS(0):** -12.2735 ppm  
**NICS(1):** -2.8646 ppm  
**NICS(-1):** -6.9919 ppm  
**Isotropic magnetic susceptibility:** -108.3894 cgs-ppm  
**Electronic energy (triplet):** -544.231671 Hartrees  
**<S<sup>2</sup>> (triplet):** 2.0587

### Cartesian coordinates:

```
C,0,1.435357388,0.0026447168,-0.5697383523
C,0,-1.435357388,-0.0026447168,-0.5697383523
C,0,-1.0805962125,1.2410222229,-0.0412835497
C,0,1.0752271726,1.2712525739,-0.1038080276
H,0,-1.6109263525,0.0248359577,-1.6468600748
C,0,-1.0752271726,-1.2712525739,-0.1038080276
C,0,-0.7399490939,1.5724797027,1.4104550729
C,0,0.7378444321,2.3872015651,-1.0982346439
C,0,-0.8185657746,2.4264746269,-0.9815569225
C,0,0.8003812243,1.7062944284,1.3374858948
C,0,1.0805962125,-1.2410222229,-0.0412835497
H,0,1.6109263525,-0.0248359577,-1.6468600748
H,0,1.2210262593,3.3421627895,-0.8531364813
H,0,1.0460936481,2.1169563248,-2.1114139325
H,0,-1.1960239387,3.3709736831,-0.5704883168
H,0,-1.2983370471,2.2846068593,-1.9532261082
H,0,1.323284497,1.1089473474,2.0820035871
H,0,1.1423715538,2.7380480885,1.4816388103
H,0,-1.0491172901,0.7946725956,2.1031718859
H,0,-1.2455067427,2.4918936172,1.7320103287
C,0,0.8185657746,-2.4264746269,-0.9815569225
C,0,-0.7378444321,-2.3872015651,-1.0982346439
C,0,0.7399490939,-1.5724797027,1.4104550729
C,0,-0.8003812243,-1.7062944284,1.3374858948
H,0,-1.0460936481,-2.1169563248,-2.1114139325
H,0,-1.2210262593,-3.3421627895,-0.8531364813
H,0,1.2983370471,-2.2846068593,-1.9532261082
H,0,1.1960239387,-3.3709736831,-0.5704883168
H,0,-1.323284497,-1.1089473474,2.0820035871
H,0,-1.1423715538,-2.7380480885,1.4816388103
H,0,1.0491172901,-0.7946725956,2.1031718859
H,0,1.2455067427,-2.4918936172,1.7320103287
```

## References

- (S1) J. Gräfenstein, A. M. Hjerpe, E. Kraka, D. Cremer, *J. Phys. Chem. A* 2000, **104**, 1748.  
(S2) Z. Chen, C. S. Wannere, C. Corminboeuf, R. Puchta, P. v. R. Schleyer, *Chem. Rev.* 2005, **105**, 3842.
